# Supplementary material
Source: publisher figshare collection journal article supplement (https://acs.figshare.com/ndownloader/files/9589378)
Supplement: Supplementary file 1 [file 9589378]

 
data_shelxl
 
_audit_creation_method            SHELXL-2013
_chemical_name_systematic
;
 ?
;
_chemical_name_common             ?
_chemical_melting_point           ?
_chemical_formula_moiety          ?
_chemical_formula_sum
 'C27 H23 Cl Fe N2' 
_chemical_formula_weight          466.77

loop_
 _atom_type_symbol
 _atom_type_description
 _atom_type_scat_dispersion_real
 _atom_type_scat_dispersion_imag
 _atom_type_scat_source
 'C'  'C'   0.0181   0.0091
 'International Tables Vol C Tables 4.2.6.8 and 6.1.1.4'
 'H'  'H'   0.0000   0.0000
 'International Tables Vol C Tables 4.2.6.8 and 6.1.1.4'
 'N'  'N'   0.0311   0.0180
 'International Tables Vol C Tables 4.2.6.8 and 6.1.1.4'
 'Cl'  'Cl'   0.3639   0.7018
 'International Tables Vol C Tables 4.2.6.8 and 6.1.1.4'
 'Fe'  'Fe'  -1.1336   3.1974
 'International Tables Vol C Tables 4.2.6.8 and 6.1.1.4'
 
_space_group_crystal_system       orthorhombic
_space_group_IT_number            19
_space_group_name_H-M_alt         'P 21 21 21'
_space_group_name_Hall            'P 2ac 2ab'
 
_shelx_space_group_comment
;
The symmetry employed for this shelxl refinement is uniquely defined
by the following loop, which should always be used as a source of
symmetry information in preference to the above space-group names.
They are only intended as comments.
;
 
loop_
 _space_group_symop_operation_xyz
 'x, y, z'
 '-x+1/2, -y, z+1/2'
 '-x, y+1/2, -z+1/2'
 'x+1/2, -y+1/2, -z'
 
_cell_length_a                    7.3285(2)
_cell_length_b                    9.4849(2)
_cell_length_c                    40.0645(8)
_cell_angle_alpha                 90
_cell_angle_beta                  90
_cell_angle_gamma                 90
_cell_volume                      2784.89(11)
_cell_formula_units_Z             4
_cell_measurement_temperature     291(2)
_cell_measurement_reflns_used     3493
_cell_measurement_theta_min       4.3900
_cell_measurement_theta_max       70.4750
 
_exptl_crystal_description        block 
_exptl_crystal_colour             ? 
_exptl_crystal_density_meas       ? 
_exptl_crystal_density_method     ?              
_exptl_crystal_density_diffrn     1.113          
_exptl_crystal_F_000              968
_exptl_transmission_factor_min    ?                                             
_exptl_transmission_factor_max    ?                                             
_exptl_crystal_size_max           0.240
_exptl_crystal_size_mid           0.200
_exptl_crystal_size_min           0.190
_exptl_absorpt_coefficient_mu     5.318
_shelx_estimated_absorpt_T_min    0.362
_shelx_estimated_absorpt_T_max    0.431
_exptl_absorpt_correction_T_min                   0.25331
_exptl_absorpt_correction_T_max                   1.00000
_exptl_absorpt_correction_type            multi-scan
_exptl_absorpt_process_details
;
CrysAlisPro 1.171.38.46 (Rigaku Oxford Diffraction, 2015)
Empirical absorption correction using spherical harmonics,
 implemented in SCALE3 ABSPACK scaling algorithm.
;
 
_exptl_special_details
;
 ?
;
 
_diffrn_ambient_temperature       293(2)
_diffrn_radiation_wavelength      1.54184
_diffrn_radiation_type            CuK\a
_diffrn_source                    'micro-focus sealed X-ray tube'                       
_diffrn_measurement_device_type   'SuperNova, Dual, Cu at zero, AtlasS2' 
_diffrn_measurement_method        '\w scans' 
_diffrn_detector_area_resol_mean  5.2169 
_diffrn_reflns_number             6800
_diffrn_reflns_av_unetI/netI      0.0473
_diffrn_reflns_av_R_equivalents   0.0398
_diffrn_reflns_limit_h_min        -7
_diffrn_reflns_limit_h_max        8
_diffrn_reflns_limit_k_min        -10
_diffrn_reflns_limit_k_max        11
_diffrn_reflns_limit_l_min        -48
_diffrn_reflns_limit_l_max        46
_diffrn_reflns_theta_min          4.414
_diffrn_reflns_theta_max          71.396
_diffrn_reflns_theta_full         67.684
_diffrn_measured_fraction_theta_max   0.974
_diffrn_measured_fraction_theta_full  0.997
_diffrn_reflns_Laue_measured_fraction_max    0.974
_diffrn_reflns_Laue_measured_fraction_full   0.997
_diffrn_reflns_point_group_measured_fraction_max   0.878
_diffrn_reflns_point_group_measured_fraction_full  0.911
_reflns_number_total              4747
_reflns_number_gt                 3869
_reflns_threshold_expression      'I > 2\s(I)'
_reflns_Friedel_coverage          0.559
_reflns_Friedel_fraction_max      0.746
_reflns_Friedel_fraction_full     0.792
 
_reflns_special_details
;
 Reflections were merged by SHELXL according to the crystal
 class for the calculation of statistics and refinement.
 
 _reflns_Friedel_fraction is defined as the number of unique
 Friedel pairs measured divided by the number that would be
 possible theoretically, ignoring centric projections and
 systematic absences.
;
 
_computing_data_collection        'CrysAlisPro (Rigaku OD, 2015)'
_computing_cell_refinement        'CrysAlisPro (Rigaku OD, 2015)'
_computing_data_reduction         'CrysAlisPro (Rigaku OD, 2015)'
_computing_structure_solution     'SHELXS-97 (Sheldrick, 1997)'
_computing_structure_refinement   'SHELXL-97 (Sheldrick, 1997)'
_computing_molecular_graphics     'Ortep-3 (L. J. Farrugia, 2001)'
_computing_publication_material   SHELXL-97
 
_refine_special_details
;
 ?
;
_refine_ls_structure_factor_coef  Fsqd
_refine_ls_matrix_type            full
_refine_ls_weighting_scheme       calc
_refine_ls_weighting_details
'w=1/[\s^2^(Fo^2^)+(0.1130P)^2^+2.2446P] where P=(Fo^2^+2Fc^2^)/3'
_atom_sites_solution_primary      ?
_atom_sites_solution_secondary    ?
_atom_sites_solution_hydrogens    geom
_refine_ls_hydrogen_treatment     constr
_refine_ls_extinction_method      none
_refine_ls_extinction_coef        .
_refine_ls_abs_structure_details
;
 Flack x determined using 1205 quotients [(I+)-(I-)]/[(I+)+(I-)]
 (Parsons and Flack (2004), Acta Cryst. A60, s61).
;
_refine_ls_abs_structure_Flack    0.006(11)
_chemical_absolute_configuration  ad
_refine_ls_number_reflns          4747
_refine_ls_number_parameters      281
_refine_ls_number_restraints      0
_refine_ls_R_factor_all           0.0855
_refine_ls_R_factor_gt            0.0708
_refine_ls_wR_factor_ref          0.2090
_refine_ls_wR_factor_gt           0.1946
_refine_ls_goodness_of_fit_ref    1.064
_refine_ls_restrained_S_all       1.064
_refine_ls_shift/su_max           0.000
_refine_ls_shift/su_mean          0.000
 
loop_
 _atom_site_label
 _atom_site_type_symbol
 _atom_site_fract_x
 _atom_site_fract_y
 _atom_site_fract_z
 _atom_site_U_iso_or_equiv
 _atom_site_adp_type
 _atom_site_occupancy
 _atom_site_site_symmetry_order  
 _atom_site_calc_flag
 _atom_site_refinement_flags_posn
 _atom_site_refinement_flags_adp
 _atom_site_refinement_flags_occupancy
 _atom_site_disorder_assembly
 _atom_site_disorder_group
Fe1 Fe 0.31893(15) 0.55826(12) 0.31233(3) 0.0487(3) Uani 1 1 d . . . . .
Cl1 Cl 0.8817(5) -0.1707(4) 0.39992(13) 0.1448(17) Uani 1 1 d . . . . .
N1 N 0.1437(10) 0.2077(7) 0.44617(15) 0.0627(17) Uani 1 1 d . . . . .
N2 N -0.0005(10) 0.2935(8) 0.44011(15) 0.0638(18) Uani 1 1 d . . . . .
H2 H -0.0743 0.3213 0.4554 0.077 Uiso 1 1 calc R U . . .
C18 C 0.1622(11) 0.4346(8) 0.34354(17) 0.0535(17) Uani 1 1 d . . . . .
C8 C 0.1276(10) 0.2692(8) 0.39157(17) 0.0496(16) Uani 1 1 d . . . . .
C4 C 0.3864(12) 0.1066(9) 0.41270(19) 0.060(2) Uani 1 1 d . . . . .
C7 C 0.2224(12) 0.1935(8) 0.41634(17) 0.0569(19) Uani 1 1 d . . . . .
C9 C -0.0175(11) 0.3310(9) 0.40809(18) 0.0562(18) Uani 1 1 d . . . . .
C16 C 0.2102(14) 0.1377(9) 0.3039(2) 0.070(2) Uani 1 1 d . . . . .
H16 H 0.3289 0.1704 0.3011 0.083 Uiso 1 1 calc R U . . .
C11 C 0.1099(11) 0.1808(8) 0.33157(17) 0.0511(17) Uani 1 1 d . . . . .
C10 C 0.1911(11) 0.2872(7) 0.35570(16) 0.0495(16) Uani 1 1 d . . . . .
H10 H 0.3232 0.2712 0.3557 0.059 Uiso 1 1 calc R U . . .
C26 C 0.4450(14) 0.4762(10) 0.2718(2) 0.070(2) Uani 1 1 d . . . . .
H26 H 0.3998 0.4060 0.2578 0.084 Uiso 1 1 calc R U . . .
C3 C 0.5367(13) 0.1189(11) 0.4339(3) 0.077(3) Uani 1 1 d . . . . .
H3 H 0.5347 0.1847 0.4511 0.093 Uiso 1 1 calc R U . . .
C5 C 0.3965(16) 0.0066(10) 0.3875(2) 0.078(3) Uani 1 1 d . . . . .
H5 H 0.2991 -0.0036 0.3728 0.094 Uiso 1 1 calc R U . . .
C19 C 0.2222(11) 0.5618(10) 0.3591(2) 0.065(2) Uani 1 1 d . . . . .
H19 H 0.2947 0.5668 0.3782 0.078 Uiso 1 1 calc R U . . .
C27 C 0.5553(12) 0.4539(12) 0.3014(3) 0.080(3) Uani 1 1 d . . . . .
H27 H 0.5930 0.3679 0.3101 0.096 Uiso 1 1 calc R U . . .
C12 C -0.0632(13) 0.1280(10) 0.3352(2) 0.068(2) Uani 1 1 d . . . . .
H12 H -0.1332 0.1547 0.3535 0.082 Uiso 1 1 calc R U . . .
C23 C 0.5937(11) 0.5893(11) 0.3142(3) 0.076(3) Uani 1 1 d . . . . .
H23 H 0.6618 0.6082 0.3333 0.091 Uiso 1 1 calc R U . . .
C25 C 0.4187(13) 0.6180(11) 0.2679(2) 0.069(2) Uani 1 1 d . . . . .
H25 H 0.3486 0.6625 0.2499 0.083 Uiso 1 1 calc R U . . .
C21 C 0.0574(12) 0.6274(10) 0.3139(3) 0.076(3) Uani 1 1 d . . . . .
H21 H 0.0001 0.6823 0.2978 0.091 Uiso 1 1 calc R U . . .
C1 C 0.6881(17) -0.0673(11) 0.4047(3) 0.090(3) Uani 1 1 d . . . . .
C20 C 0.1540(16) 0.6791(10) 0.3411(3) 0.081(3) Uani 1 1 d . . . . .
H20 H 0.1708 0.7735 0.3466 0.098 Uiso 1 1 calc R U . . .
C22 C 0.0597(10) 0.4787(8) 0.3145(2) 0.0572(18) Uani 1 1 d . . . . .
H22 H 0.0050 0.4194 0.2989 0.069 Uiso 1 1 calc R U . . .
C6 C 0.5479(18) -0.0779(12) 0.3838(3) 0.092(3) Uani 1 1 d . . . . .
H6 H 0.5522 -0.1430 0.3665 0.110 Uiso 1 1 calc R U . . .
C24 C 0.5128(13) 0.6901(11) 0.2937(2) 0.072(2) Uani 1 1 d . . . . .
H24 H 0.5194 0.7874 0.2964 0.086 Uiso 1 1 calc R U . . .
C14 C -0.0366(18) -0.0060(11) 0.2844(2) 0.081(3) Uani 1 1 d . . . . .
H14 H -0.0856 -0.0682 0.2689 0.098 Uiso 1 1 calc R U . . .
C17 C -0.1714(13) 0.4218(10) 0.3966(2) 0.074(2) Uani 1 1 d . . . . .
H17A H -0.2852 0.3782 0.4024 0.111 Uiso 1 1 calc R U . . .
H17B H -0.1648 0.4333 0.3728 0.111 Uiso 1 1 calc R U . . .
H17C H -0.1631 0.5124 0.4072 0.111 Uiso 1 1 calc R U . . .
C13 C -0.1351(14) 0.0350(10) 0.3118(2) 0.080(3) Uani 1 1 d . . . . .
H13 H -0.2525 0.0000 0.3148 0.096 Uiso 1 1 calc R U . . .
C15 C 0.1359(17) 0.0469(12) 0.2805(2) 0.084(3) Uani 1 1 d . . . . .
H15 H 0.2039 0.0215 0.2618 0.101 Uiso 1 1 calc R U . . .
C2 C 0.6866(16) 0.0352(12) 0.4297(3) 0.096(3) Uani 1 1 d . . . . .
H2A H 0.7877 0.0465 0.4435 0.115 Uiso 1 1 calc R U . . .
 
loop_
 _atom_site_aniso_label
 _atom_site_aniso_U_11
 _atom_site_aniso_U_22
 _atom_site_aniso_U_33
 _atom_site_aniso_U_23
 _atom_site_aniso_U_13
 _atom_site_aniso_U_12
Fe1 0.0442(6) 0.0513(5) 0.0504(6) 0.0035(6) 0.0072(5) -0.0030(5)
Cl1 0.100(2) 0.125(3) 0.209(4) 0.027(3) 0.044(3) 0.051(2)
N1 0.076(5) 0.072(4) 0.040(3) 0.004(3) -0.001(3) 0.004(4)
N2 0.072(4) 0.080(4) 0.040(3) -0.003(3) 0.014(3) 0.006(4)
C18 0.057(4) 0.056(4) 0.048(3) 0.001(3) 0.016(3) 0.006(4)
C8 0.050(4) 0.055(4) 0.043(3) 0.002(3) -0.006(3) 0.002(3)
C4 0.072(5) 0.057(4) 0.052(4) 0.008(3) -0.005(4) -0.002(4)
C7 0.077(5) 0.052(4) 0.042(4) 0.000(3) -0.001(4) 0.000(4)
C9 0.061(5) 0.064(4) 0.044(3) 0.005(3) 0.006(4) 0.006(4)
C16 0.073(6) 0.074(5) 0.062(5) -0.011(4) 0.010(4) 0.000(4)
C11 0.062(5) 0.050(4) 0.042(3) 0.008(3) 0.004(3) -0.001(3)
C10 0.048(4) 0.057(4) 0.043(3) 0.002(3) 0.006(3) 0.002(4)
C26 0.074(6) 0.081(6) 0.054(4) -0.011(4) 0.022(4) -0.013(5)
C3 0.059(5) 0.077(6) 0.096(7) -0.015(5) -0.019(5) 0.004(5)
C5 0.108(8) 0.069(5) 0.057(5) -0.009(4) -0.009(5) 0.023(5)
C19 0.058(5) 0.078(5) 0.060(4) -0.014(4) 0.028(4) -0.008(5)
C27 0.047(4) 0.086(6) 0.106(8) 0.009(6) 0.019(5) 0.013(5)
C12 0.066(5) 0.084(6) 0.055(4) -0.005(4) 0.008(4) -0.016(5)
C23 0.037(4) 0.113(8) 0.078(5) -0.008(6) 0.006(4) -0.011(4)
C25 0.059(5) 0.098(7) 0.052(4) 0.009(4) 0.013(4) -0.014(5)
C21 0.054(5) 0.068(5) 0.106(7) 0.026(6) 0.013(6) 0.012(4)
C1 0.092(7) 0.068(6) 0.111(8) 0.010(6) 0.029(7) 0.016(6)
C20 0.093(7) 0.050(4) 0.101(7) -0.010(5) 0.041(7) -0.001(5)
C22 0.047(4) 0.057(4) 0.067(5) 0.012(4) 0.013(4) -0.001(3)
C6 0.114(9) 0.082(7) 0.079(6) -0.009(5) 0.016(7) 0.028(7)
C24 0.064(5) 0.072(5) 0.081(6) 0.005(5) 0.011(5) -0.022(5)
C14 0.110(9) 0.071(5) 0.063(5) -0.011(4) -0.019(6) -0.001(6)
C17 0.072(5) 0.083(6) 0.067(5) 0.014(4) 0.019(5) 0.007(5)
C13 0.083(6) 0.086(6) 0.071(5) 0.000(5) -0.009(5) -0.019(5)
C15 0.104(8) 0.088(6) 0.060(5) -0.018(5) -0.002(5) 0.011(7)
C2 0.064(6) 0.097(8) 0.126(9) 0.003(7) -0.020(7) -0.004(6)
 
_geom_special_details
;
 All esds (except the esd in the dihedral angle between two l.s. planes)
 are estimated using the full covariance matrix.  The cell esds are taken
 into account individually in the estimation of esds in distances, angles
 and torsion angles; correlations between esds in cell parameters are only
 used when they are defined by crystal symmetry.  An approximate (isotropic)
 treatment of cell esds is used for estimating esds involving l.s. planes.
;
 
loop_
 _geom_bond_atom_site_label_1
 _geom_bond_atom_site_label_2
 _geom_bond_distance
 _geom_bond_site_symmetry_2
 _geom_bond_publ_flag
Fe1 C19 2.005(7) . ?
Fe1 C25 2.007(8) . ?
Fe1 C26 2.024(8) . ?
Fe1 C21 2.026(9) . ?
Fe1 C20 2.027(9) . ?
Fe1 C24 2.035(8) . ?
Fe1 C23 2.036(8) . ?
Fe1 C27 2.043(9) . ?
Fe1 C22 2.046(8) . ?
Fe1 C18 2.064(7) . ?
Cl1 C1 1.735(11) . ?
N1 C7 1.334(10) . ?
N1 N2 1.356(10) . ?
N2 C9 1.337(9) . ?
N2 H2 0.8600 . ?
C18 C19 1.428(12) . ?
C18 C22 1.448(11) . ?
C18 C10 1.495(10) . ?
C8 C9 1.383(11) . ?
C8 C7 1.408(10) . ?
C8 C10 1.520(9) . ?
C4 C5 1.388(12) . ?
C4 C3 1.397(13) . ?
C4 C7 1.464(12) . ?
C9 C17 1.491(12) . ?
C16 C15 1.387(13) . ?
C16 C11 1.391(11) . ?
C16 H16 0.9300 . ?
C11 C12 1.371(12) . ?
C11 C10 1.519(11) . ?
C10 H10 0.9800 . ?
C26 C25 1.368(13) . ?
C26 C27 1.451(14) . ?
C26 H26 0.9300 . ?
C3 C2 1.365(15) . ?
C3 H3 0.9300 . ?
C5 C6 1.376(14) . ?
C5 H5 0.9300 . ?
C19 C20 1.417(14) . ?
C19 H19 0.9300 . ?
C27 C23 1.412(14) . ?
C27 H27 0.9300 . ?
C12 C13 1.390(12) . ?
C12 H12 0.9300 . ?
C23 C24 1.394(14) . ?
C23 H23 0.9300 . ?
C25 C24 1.418(13) . ?
C25 H25 0.9800 . ?
C21 C20 1.390(16) . ?
C21 C22 1.411(11) . ?
C21 H21 0.9300 . ?
C1 C6 1.329(17) . ?
C1 C2 1.397(16) . ?
C20 H20 0.9300 . ?
C22 H22 0.9300 . ?
C6 H6 0.9300 . ?
C24 H24 0.9300 . ?
C14 C15 1.369(15) . ?
C14 C13 1.370(14) . ?
C14 H14 0.9300 . ?
C17 H17A 0.9600 . ?
C17 H17B 0.9600 . ?
C17 H17C 0.9600 . ?
C13 H13 0.9300 . ?
C15 H15 0.9300 . ?
C2 H2A 0.9300 . ?
 
loop_
 _geom_angle_atom_site_label_1
 _geom_angle_atom_site_label_2
 _geom_angle_atom_site_label_3
 _geom_angle
 _geom_angle_site_symmetry_1
 _geom_angle_site_symmetry_3
 _geom_angle_publ_flag
C19 Fe1 C25 162.6(4) . . ?
C19 Fe1 C26 156.7(4) . . ?
C25 Fe1 C26 39.7(4) . . ?
C19 Fe1 C21 68.4(5) . . ?
C25 Fe1 C21 106.3(4) . . ?
C26 Fe1 C21 125.5(5) . . ?
C19 Fe1 C20 41.2(4) . . ?
C25 Fe1 C20 124.3(4) . . ?
C26 Fe1 C20 161.2(4) . . ?
C21 Fe1 C20 40.1(5) . . ?
C19 Fe1 C24 125.4(4) . . ?
C25 Fe1 C24 41.1(4) . . ?
C26 Fe1 C24 67.9(4) . . ?
C21 Fe1 C24 118.2(4) . . ?
C20 Fe1 C24 106.1(4) . . ?
C19 Fe1 C23 108.2(4) . . ?
C25 Fe1 C23 68.4(4) . . ?
C26 Fe1 C23 68.6(4) . . ?
C21 Fe1 C23 152.5(4) . . ?
C20 Fe1 C23 119.1(5) . . ?
C24 Fe1 C23 40.0(4) . . ?
C19 Fe1 C27 120.6(4) . . ?
C25 Fe1 C27 68.7(4) . . ?
C26 Fe1 C27 41.8(4) . . ?
C21 Fe1 C27 164.9(5) . . ?
C20 Fe1 C27 154.4(5) . . ?
C24 Fe1 C27 68.1(4) . . ?
C23 Fe1 C27 40.5(4) . . ?
C19 Fe1 C22 68.8(4) . . ?
C25 Fe1 C22 118.6(4) . . ?
C26 Fe1 C22 108.4(4) . . ?
C21 Fe1 C22 40.5(3) . . ?
C20 Fe1 C22 68.4(4) . . ?
C24 Fe1 C22 152.9(4) . . ?
C23 Fe1 C22 165.9(4) . . ?
C27 Fe1 C22 128.1(4) . . ?
C19 Fe1 C18 41.1(3) . . ?
C25 Fe1 C18 154.3(4) . . ?
C26 Fe1 C18 121.4(3) . . ?
C21 Fe1 C18 68.8(4) . . ?
C20 Fe1 C18 69.2(3) . . ?
C24 Fe1 C18 163.8(4) . . ?
C23 Fe1 C18 127.6(4) . . ?
C27 Fe1 C18 109.0(4) . . ?
C22 Fe1 C18 41.3(3) . . ?
C7 N1 N2 103.7(6) . . ?
C9 N2 N1 113.8(6) . . ?
C9 N2 H2 123.1 . . ?
N1 N2 H2 123.1 . . ?
C19 C18 C22 105.5(7) . . ?
C19 C18 C10 127.1(7) . . ?
C22 C18 C10 127.3(7) . . ?
C19 C18 Fe1 67.3(4) . . ?
C22 C18 Fe1 68.7(4) . . ?
C10 C18 Fe1 130.5(5) . . ?
C9 C8 C7 105.0(6) . . ?
C9 C8 C10 129.8(7) . . ?
C7 C8 C10 124.9(7) . . ?
C5 C4 C3 117.2(9) . . ?
C5 C4 C7 120.1(8) . . ?
C3 C4 C7 122.7(8) . . ?
N1 C7 C8 111.5(7) . . ?
N1 C7 C4 120.1(7) . . ?
C8 C7 C4 128.4(7) . . ?
N2 C9 C8 105.9(7) . . ?
N2 C9 C17 121.3(7) . . ?
C8 C9 C17 132.8(7) . . ?
C15 C16 C11 120.9(9) . . ?
C15 C16 H16 119.5 . . ?
C11 C16 H16 119.5 . . ?
C12 C11 C16 117.8(8) . . ?
C12 C11 C10 122.5(7) . . ?
C16 C11 C10 119.7(7) . . ?
C18 C10 C11 111.0(6) . . ?
C18 C10 C8 111.7(6) . . ?
C11 C10 C8 114.0(6) . . ?
C18 C10 H10 106.5 . . ?
C11 C10 H10 106.5 . . ?
C8 C10 H10 106.5 . . ?
C25 C26 C27 108.4(9) . . ?
C25 C26 Fe1 69.5(5) . . ?
C27 C26 Fe1 69.8(5) . . ?
C25 C26 H26 125.8 . . ?
C27 C26 H26 125.8 . . ?
Fe1 C26 H26 126.5 . . ?
C2 C3 C4 120.7(10) . . ?
C2 C3 H3 119.6 . . ?
C4 C3 H3 119.6 . . ?
C6 C5 C4 121.3(10) . . ?
C6 C5 H5 119.3 . . ?
C4 C5 H5 119.3 . . ?
C20 C19 C18 109.4(8) . . ?
C20 C19 Fe1 70.2(5) . . ?
C18 C19 Fe1 71.7(4) . . ?
C20 C19 H19 125.3 . . ?
C18 C19 H19 125.3 . . ?
Fe1 C19 H19 124.4 . . ?
C23 C27 C26 106.0(9) . . ?
C23 C27 Fe1 69.5(5) . . ?
C26 C27 Fe1 68.4(5) . . ?
C23 C27 H27 127.0 . . ?
C26 C27 H27 127.0 . . ?
Fe1 C27 H27 126.6 . . ?
C11 C12 C13 120.7(8) . . ?
C11 C12 H12 119.6 . . ?
C13 C12 H12 119.6 . . ?
C24 C23 C27 108.9(9) . . ?
C24 C23 Fe1 69.9(5) . . ?
C27 C23 Fe1 70.0(5) . . ?
C24 C23 H23 125.5 . . ?
C27 C23 H23 125.5 . . ?
Fe1 C23 H23 126.1 . . ?
C26 C25 C24 108.8(9) . . ?
C26 C25 Fe1 70.9(5) . . ?
C24 C25 Fe1 70.5(5) . . ?
C26 C25 H25 125.6 . . ?
C24 C25 H25 125.6 . . ?
Fe1 C25 H25 125.6 . . ?
C20 C21 C22 109.6(10) . . ?
C20 C21 Fe1 69.9(6) . . ?
C22 C21 Fe1 70.5(5) . . ?
C20 C21 H21 125.2 . . ?
C22 C21 H21 125.2 . . ?
Fe1 C21 H21 125.9 . . ?
C6 C1 C2 119.9(10) . . ?
C6 C1 Cl1 121.3(9) . . ?
C2 C1 Cl1 118.6(11) . . ?
C21 C20 C19 107.6(8) . . ?
C21 C20 Fe1 69.9(5) . . ?
C19 C20 Fe1 68.6(5) . . ?
C21 C20 H20 126.2 . . ?
C19 C20 H20 126.2 . . ?
Fe1 C20 H20 126.8 . . ?
C21 C22 C18 107.9(9) . . ?
C21 C22 Fe1 69.0(5) . . ?
C18 C22 Fe1 70.0(5) . . ?
C21 C22 H22 126.0 . . ?
C18 C22 H22 126.0 . . ?
Fe1 C22 H22 126.5 . . ?
C1 C6 C5 120.7(10) . . ?
C1 C6 H6 119.6 . . ?
C5 C6 H6 119.6 . . ?
C23 C24 C25 107.8(9) . . ?
C23 C24 Fe1 70.0(5) . . ?
C25 C24 Fe1 68.4(5) . . ?
C23 C24 H24 126.1 . . ?
C25 C24 H24 126.1 . . ?
Fe1 C24 H24 127.1 . . ?
C15 C14 C13 118.4(9) . . ?
C15 C14 H14 120.8 . . ?
C13 C14 H14 120.8 . . ?
C9 C17 H17A 109.5 . . ?
C9 C17 H17B 109.5 . . ?
H17A C17 H17B 109.5 . . ?
C9 C17 H17C 109.5 . . ?
H17A C17 H17C 109.5 . . ?
H17B C17 H17C 109.5 . . ?
C14 C13 C12 121.3(9) . . ?
C14 C13 H13 119.3 . . ?
C12 C13 H13 119.3 . . ?
C14 C15 C16 120.8(10) . . ?
C14 C15 H15 119.6 . . ?
C16 C15 H15 119.6 . . ?
C3 C2 C1 120.0(11) . . ?
C3 C2 H2A 120.0 . . ?
C1 C2 H2A 120.0 . . ?
 
loop_
 _geom_torsion_atom_site_label_1
 _geom_torsion_atom_site_label_2
 _geom_torsion_atom_site_label_3
 _geom_torsion_atom_site_label_4
 _geom_torsion
 _geom_torsion_site_symmetry_1
 _geom_torsion_site_symmetry_2
 _geom_torsion_site_symmetry_3
 _geom_torsion_site_symmetry_4
 _geom_torsion_publ_flag
C7 N1 N2 C9 1.2(9) . . . . ?
N2 N1 C7 C8 -0.4(9) . . . . ?
N2 N1 C7 C4 179.9(7) . . . . ?
C9 C8 C7 N1 -0.5(9) . . . . ?
C10 C8 C7 N1 173.7(7) . . . . ?
C9 C8 C7 C4 179.2(8) . . . . ?
C10 C8 C7 C4 -6.6(13) . . . . ?
C5 C4 C7 N1 131.2(9) . . . . ?
C3 C4 C7 N1 -48.4(12) . . . . ?
C5 C4 C7 C8 -48.5(13) . . . . ?
C3 C4 C7 C8 131.9(10) . . . . ?
N1 N2 C9 C8 -1.5(10) . . . . ?
N1 N2 C9 C17 178.3(8) . . . . ?
C7 C8 C9 N2 1.2(9) . . . . ?
C10 C8 C9 N2 -172.6(7) . . . . ?
C7 C8 C9 C17 -178.6(9) . . . . ?
C10 C8 C9 C17 7.7(15) . . . . ?
C15 C16 C11 C12 1.4(13) . . . . ?
C15 C16 C11 C10 -176.4(8) . . . . ?
C19 C18 C10 C11 -178.7(7) . . . . ?
C22 C18 C10 C11 4.7(11) . . . . ?
Fe1 C18 C10 C11 -88.2(9) . . . . ?
C19 C18 C10 C8 52.8(10) . . . . ?
C22 C18 C10 C8 -123.7(8) . . . . ?
Fe1 C18 C10 C8 143.4(6) . . . . ?
C12 C11 C10 C18 -93.8(9) . . . . ?
C16 C11 C10 C18 83.8(9) . . . . ?
C12 C11 C10 C8 33.4(11) . . . . ?
C16 C11 C10 C8 -149.0(7) . . . . ?
C9 C8 C10 C18 34.8(11) . . . . ?
C7 C8 C10 C18 -137.8(8) . . . . ?
C9 C8 C10 C11 -92.0(10) . . . . ?
C7 C8 C10 C11 95.4(9) . . . . ?
C5 C4 C3 C2 0.1(15) . . . . ?
C7 C4 C3 C2 179.7(9) . . . . ?
C3 C4 C5 C6 0.5(15) . . . . ?
C7 C4 C5 C6 -179.1(9) . . . . ?
C22 C18 C19 C20 2.0(8) . . . . ?
C10 C18 C19 C20 -175.1(8) . . . . ?
Fe1 C18 C19 C20 60.4(6) . . . . ?
C22 C18 C19 Fe1 -58.3(5) . . . . ?
C10 C18 C19 Fe1 124.5(8) . . . . ?
C25 C26 C27 C23 -0.7(10) . . . . ?
Fe1 C26 C27 C23 -59.6(6) . . . . ?
C25 C26 C27 Fe1 58.9(7) . . . . ?
C16 C11 C12 C13 -0.2(13) . . . . ?
C10 C11 C12 C13 177.4(8) . . . . ?
C26 C27 C23 C24 -0.3(10) . . . . ?
Fe1 C27 C23 C24 -59.3(6) . . . . ?
C26 C27 C23 Fe1 58.9(6) . . . . ?
C27 C26 C25 C24 1.5(11) . . . . ?
Fe1 C26 C25 C24 60.6(6) . . . . ?
C27 C26 C25 Fe1 -59.1(6) . . . . ?
C22 C21 C20 C19 1.1(11) . . . . ?
Fe1 C21 C20 C19 -58.5(6) . . . . ?
C22 C21 C20 Fe1 59.5(7) . . . . ?
C18 C19 C20 C21 -2.0(10) . . . . ?
Fe1 C19 C20 C21 59.3(7) . . . . ?
C18 C19 C20 Fe1 -61.3(5) . . . . ?
C20 C21 C22 C18 0.2(11) . . . . ?
Fe1 C21 C22 C18 59.4(6) . . . . ?
C20 C21 C22 Fe1 -59.2(7) . . . . ?
C19 C18 C22 C21 -1.4(9) . . . . ?
C10 C18 C22 C21 175.8(8) . . . . ?
Fe1 C18 C22 C21 -58.8(6) . . . . ?
C19 C18 C22 Fe1 57.4(5) . . . . ?
C10 C18 C22 Fe1 -125.5(8) . . . . ?
C2 C1 C6 C5 -3.3(18) . . . . ?
Cl1 C1 C6 C5 -178.8(8) . . . . ?
C4 C5 C6 C1 1.1(17) . . . . ?
C27 C23 C24 C25 1.2(10) . . . . ?
Fe1 C23 C24 C25 -58.1(6) . . . . ?
C27 C23 C24 Fe1 59.3(6) . . . . ?
C26 C25 C24 C23 -1.7(11) . . . . ?
Fe1 C25 C24 C23 59.1(6) . . . . ?
C26 C25 C24 Fe1 -60.8(7) . . . . ?
C15 C14 C13 C12 0.0(15) . . . . ?
C11 C12 C13 C14 -0.4(15) . . . . ?
C13 C14 C15 C16 1.2(16) . . . . ?
C11 C16 C15 C14 -1.9(15) . . . . ?
C4 C3 C2 C1 -2.3(17) . . . . ?
C6 C1 C2 C3 3.9(18) . . . . ?
Cl1 C1 C2 C3 179.5(9) . . . . ?

loop_
  _platon_squeeze_void_nr
  _platon_squeeze_void_average_x
  _platon_squeeze_void_average_y
  _platon_squeeze_void_average_z
  _platon_squeeze_void_volume
  _platon_squeeze_void_count_electrons
  _platon_squeeze_void_content
   1 -0.038  0.250  0.000       320        66 ' '
   2 -0.030  0.750  0.500       320        65 ' '
_platon_squeeze_details
;
;

_refine_diff_density_max    0.589
_refine_diff_density_min   -0.568
_refine_diff_density_rms    0.079

_shelxl_version_number 2013-4

_shelx_res_file
;
TITL czx128-1_a.res in P2(1)2(1)2(1)
CELL  1.54184   7.3285   9.4849  40.0645   90.000   90.000   90.000
ZERR     4.00   0.0002   0.0002   0.0008    0.000    0.000    0.000
LATT  -1
SYMM  1/2 - X, - Y, 1/2 + Z
SYMM  - X, 1/2 + Y, 1/2 - Z
SYMM  1/2 + X, 1/2 - Y, - Z
SFAC  C    H    N   CL   FE
UNIT  108  92    8  4    4
MERG   2
MORE -1
FMAP   2
PLAN   12
BOND   $H
CONF
LIST   6
L.S.   4
acta
size 0.24 0.20 0.19
WGHT    0.113000    2.244600
FVAR       4.77428
FE1   5    0.318926    0.558255    0.312330    11.00000    0.04420    0.05133 =
         0.05045    0.00354    0.00717   -0.00296
CL1   4    0.881678   -0.170689    0.399925    11.00000    0.10016    0.12495 =
         0.20930    0.02735    0.04439    0.05139
N1    3    0.143658    0.207734    0.446167    11.00000    0.07593    0.07221 =
         0.03993    0.00402   -0.00139    0.00353
N2    3   -0.000527    0.293512    0.440106    11.00000    0.07194    0.07963 =
         0.03997   -0.00267    0.01373    0.00559
AFIX  43
H2    2   -0.074331    0.321251    0.455448    11.00000   -1.20000
AFIX   0
C18   1    0.162179    0.434566    0.343537    11.00000    0.05717    0.05575 =
         0.04764    0.00116    0.01579    0.00584
C8    1    0.127640    0.269192    0.391567    11.00000    0.05029    0.05536 =
         0.04318    0.00201   -0.00567    0.00171
C4    1    0.386380    0.106646    0.412697    11.00000    0.07182    0.05697 =
         0.05228    0.00772   -0.00474   -0.00202
C7    1    0.222435    0.193489    0.416338    11.00000    0.07700    0.05203 =
         0.04160   -0.00016   -0.00147   -0.00048
C9    1   -0.017487    0.331041    0.408088    11.00000    0.06063    0.06447 =
         0.04353    0.00510    0.00586    0.00640
C16   1    0.210237    0.137742    0.303916    11.00000    0.07302    0.07364 =
         0.06200   -0.01103    0.00981   -0.00028
AFIX  43
H16   2    0.328921    0.170371    0.301114    11.00000   -1.20000
AFIX   0
C11   1    0.109897    0.180809    0.331567    11.00000    0.06150    0.05024 =
         0.04157    0.00778    0.00382   -0.00066
C10   1    0.191103    0.287192    0.355703    11.00000    0.04768    0.05737 =
         0.04340    0.00174    0.00592    0.00172
AFIX  13
H10   2    0.323221    0.271222    0.355712    11.00000   -1.20000
AFIX   0
C26   1    0.444965    0.476183    0.271784    11.00000    0.07419    0.08150 =
         0.05429   -0.01110    0.02237   -0.01298
AFIX  43
H26   2    0.399809    0.406008    0.257834    11.00000   -1.20000
AFIX   0
C3    1    0.536720    0.118860    0.433932    11.00000    0.05891    0.07681 =
         0.09616   -0.01507   -0.01940    0.00393
AFIX  43
H3    2    0.534703    0.184694    0.451130    11.00000   -1.20000
AFIX   0
C5    1    0.396537    0.006572    0.387497    11.00000    0.10837    0.06918 =
         0.05683   -0.00881   -0.00901    0.02306
AFIX  43
H5    2    0.299101   -0.003637    0.372823    11.00000   -1.20000
AFIX   0
C19   1    0.222204    0.561774    0.359142    11.00000    0.05795    0.07810 =
         0.05983   -0.01413    0.02847   -0.00772
AFIX  43
H19   2    0.294745    0.566825    0.378151    11.00000   -1.20000
AFIX   0
C27   1    0.555284    0.453871    0.301398    11.00000    0.04717    0.08627 =
         0.10606    0.00927    0.01901    0.01288
AFIX  43
H27   2    0.593034    0.367857    0.310145    11.00000   -1.20000
AFIX   0
C12   1   -0.063182    0.128033    0.335186    11.00000    0.06627    0.08378 =
         0.05485   -0.00476    0.00833   -0.01586
AFIX  43
H12   2   -0.133221    0.154735    0.353481    11.00000   -1.20000
AFIX   0
C23   1    0.593652    0.589325    0.314233    11.00000    0.03735    0.11278 =
         0.07784   -0.00843    0.00628   -0.01134
AFIX  43
H23   2    0.661790    0.608213    0.333298    11.00000   -1.20000
AFIX   0
C25   1    0.418725    0.617981    0.267885    11.00000    0.05866    0.09775 =
         0.05182    0.00930    0.01263   -0.01421
AFIX  13
H25   2    0.348562    0.662550    0.249933    11.00000   -1.20000
AFIX   0
C21   1    0.057409    0.627359    0.313905    11.00000    0.05439    0.06794 =
         0.10584    0.02639    0.01288    0.01247
AFIX  43
H21   2    0.000100    0.682342    0.297796    11.00000   -1.20000
AFIX   0
C1    1    0.688061   -0.067334    0.404694    11.00000    0.09184    0.06800 =
         0.11084    0.00972    0.02922    0.01575
C20   1    0.153974    0.679082    0.341140    11.00000    0.09269    0.05018 =
         0.10121   -0.01044    0.04086   -0.00084
AFIX  43
H20   2    0.170758    0.773533    0.346564    11.00000   -1.20000
AFIX   0
C22   1    0.059686    0.478666    0.314452    11.00000    0.04736    0.05673 =
         0.06737    0.01243    0.01257   -0.00086
AFIX  43
H22   2    0.005033    0.419436    0.298888    11.00000   -1.20000
AFIX   0
C6    1    0.547890   -0.077866    0.383785    11.00000    0.11435    0.08198 =
         0.07876   -0.00943    0.01601    0.02849
AFIX  43
H6    2    0.552152   -0.143018    0.366455    11.00000   -1.20000
AFIX   0
C24   1    0.512806    0.690111    0.293684    11.00000    0.06377    0.07165 =
         0.08075    0.00461    0.01115   -0.02219
AFIX  43
H24   2    0.519379    0.787354    0.296405    11.00000   -1.20000
AFIX   0
C14   1   -0.036580   -0.005976    0.284434    11.00000    0.10982    0.07126 =
         0.06337   -0.01105   -0.01882   -0.00140
AFIX  43
H14   2   -0.085646   -0.068244    0.268911    11.00000   -1.20000
AFIX   0
C17   1   -0.171363    0.421839    0.396622    11.00000    0.07209    0.08311 =
         0.06668    0.01369    0.01923    0.00656
AFIX 137
H17A  2   -0.285199    0.378227    0.402449    11.00000   -1.50000
H17B  2   -0.164843    0.433287    0.372844    11.00000   -1.50000
H17C  2   -0.163092    0.512448    0.407191    11.00000   -1.50000
AFIX   0
C13   1   -0.135132    0.035040    0.311805    11.00000    0.08293    0.08574 =
         0.07150    0.00002   -0.00857   -0.01913
AFIX  43
H13   2   -0.252507    0.000002    0.314814    11.00000   -1.20000
AFIX   0
C15   1    0.135850    0.046866    0.280471    11.00000    0.10409    0.08762 =
         0.05958   -0.01762   -0.00177    0.01141
AFIX  43
H15   2    0.203949    0.021510    0.261826    11.00000   -1.20000
AFIX   0
C2    1    0.686602    0.035225    0.429723    11.00000    0.06409    0.09746 =
         0.12573    0.00298   -0.02033   -0.00401
AFIX  43
H2A   2    0.787655    0.046521    0.443507    11.00000   -1.20000
AFIX   0
HKLF    4

REM  czx128-1_a.res in P2(1)2(1)2(1)
REM R1 =  0.0708 for    3869 Fo > 4sig(Fo)  and  0.0855 for all    4747 data
REM    281 parameters refined using      0 restraints

END

WGHT      0.1127      2.2572

REM Highest difference peak  0.589,  deepest hole -0.568,  1-sigma level  0.079
Q1    1   0.3164  0.5539  0.2868  11.00000  0.05    0.59
Q2    1   0.3218  0.5514  0.3360  11.00000  0.05    0.57
Q3    1  -0.1895  0.3233  0.4922  11.00000  0.05    0.44
Q4    1   0.5864  0.5832  0.2831  11.00000  0.05    0.35
Q5    1   0.0587  0.4822  0.3384  11.00000  0.05    0.35
Q6    1   0.3172  0.5523  0.2504  11.00000  0.05    0.33
Q7    1   0.3180  0.6480  0.3014  11.00000  0.05    0.32
Q8    1   0.3139  0.4888  0.2969  11.00000  0.05    0.32
Q9    1   0.1368  0.5888  0.2518  11.00000  0.05    0.28
Q10   1   0.1616  0.5489  0.2967  11.00000  0.05    0.27
Q11   1   0.5028  0.5659  0.2568  11.00000  0.05    0.27
Q12   1   0.0367  0.5531  0.3063  11.00000  0.05    0.27
;
_shelx_res_checksum    9648

_shelx_hkl_file
;
   0   0  -4  678015    1642                                                      180538   87.64   -3.18  1.0000
   0   0  -6   10822     833                                                       34454   50.14   -3.82  1.0000
   0   0  -8 1012605    4413                                                      851768   18.18   -3.72  1.0000
   0   0 -10  771402    4514                                                      754917   -2.30   -2.97  1.0000
   0   0 -12   13704     441                                                        4807  -11.46   -1.73  1.0000
   0   0 -14  123020    2396                                                      165462  -12.46   -0.37  1.0000
   0   0 -16   42063    1034                                                       27385   -8.90    0.62  1.0000
   0   0 -18    2859     537                                                        5020   -3.94    1.02  1.0000
   0   0 -20   71121    1771                                                       70955   -0.05    1.02  1.0000
   0   0 -22   48874    1569                                                       51736    1.55    0.96  1.0000
   0   0 -24  204805    3208                                                      200433    1.18    0.98  1.0000
   0   0 -26   21840    1160                                                       21618    0.01    1.00  1.0000
   0   0 -28    8327     474                                                        9336   -1.14    0.97  1.0000
   0   0 -30   14158     641                                                       16729   -2.13    0.95  1.0000
   0   0 -32   23399     703                                                       19181   -3.04    1.03  1.0000
   0   0 -34    3433     441                                                        5787   -3.69    1.13  1.0000
   0   0 -36   12946     557                                                        9375   -3.75    1.15  1.0000
   0   0 -38    2686     321                                                        1337   -3.16    1.12  1.0000
   0   0 -40   23478     846                                                       26966   -2.26    1.13  1.0000
   0   0 -42    2586     318                                                        1848   -1.48    1.12  1.0000
   0   0 -44     554     235                                                         581   -1.02    0.96  1.0000
   0   0 -46    2209     274                                                        2644   -0.84    0.61  1.0000
   0   1   1  141912     452                                                       37303   -0.22   40.44  1.0000
   0   1  -1  142325     445                                                       37842    0.70   40.20  1.0000
   0   1  -2    9123     468                                                       38674   -0.20  -23.03  1.0000
   0   1  -3   46907     250                                                        8908    1.39   26.90  1.0000
   0   1  -4  941521    2083                                                      626653   -1.15  -39.31  1.0000
   0   1  -5   93078     945                                                      114035    1.72    7.10  1.0000
   0   1  -6  139402    1879                                                      339406   -1.99  -46.07  1.0000
   0   1  -7   25173     400                                                       11778    1.66  -10.96  1.0000
   0   1  -8  189274    2468                                                      402848   -2.35  -43.87  1.0000
   0  -1  -9  148355    1307                                                       78563   -2.96   23.14  1.0000
   0   1  -9  148230    1216                                                       80515    1.20  -22.28  1.0000
   0   1 -10   30379     253                                                        1914   -2.25  -35.82  1.0000
   0  -1 -10   29029     254                                                        1571   -0.78  -35.90  1.0000
   0   1 -11   25950     292                                                        2195    0.44  -26.30  1.0000
   0  -1 -11   27920     294                                                        1868   -2.44   27.27  1.0000
   0   1 -12   90420    2193                                                      174209   -1.94  -25.69  1.0000
   0  -1 -12   83824    2280                                                      166687   -0.90  -26.30  1.0000
   0  -1 -13   77956    2302                                                      155562   -1.41   25.45  1.0000
   0   1 -13   82914    2183                                                      160501   -0.43  -24.85  1.0000
   0  -1 -14   52896     949                                                       22869   -0.94  -17.52  1.0000
   0   1 -14   52571     892                                                       23623   -1.68  -16.62  1.0000
   0  -1 -15    6139    1072                                                       28702   -0.42   20.03  1.0000
   0   1 -15    5600     969                                                       27408   -1.09  -19.93  1.0000
   0  -1 -16     865     564                                                        6393   -0.95  -11.08  1.0000
   0   1 -16    1023     512                                                        6361   -1.51  -10.43  1.0000
   0   1 -17     154     481                                                        5070   -1.32  -13.15  1.0000
   0  -1 -17     149     538                                                        5053    0.01   13.07  1.0000
   0  -1 -18   43482    1633                                                       58819   -1.05   -7.41  1.0000
   0   1 -18   42486    1477                                                       57819   -1.37   -7.43  1.0000
   0   1 -19   32790    1323                                                       44062   -1.15   -6.26  1.0000
   0   1 -20  201933    2655                                                      175435   -1.17   -6.63  1.0000
   0   1 -21    5763     562                                                        5055   -0.75   -0.91  1.0000
   0   1 -22  121633    2509                                                      143699   -0.86   -6.62  1.0000
   0   1 -23    1300     386                                                         700   -0.26    2.23  1.0000
   0   1 -24    2048     362                                                         251   -0.48   -6.45  1.0000
   0   1 -25     136     423                                                         700    0.23    3.64  1.0000
   0   1 -26   22254     944                                                       14963   -0.13   -6.00  1.0000
   0   1 -27   15345     731                                                       20577    0.60    4.27  1.0000
   0   1 -27   15566    1128                                                       20833    0.60    4.27  1.0000
   0  -1 -27   15171     616                                                       19169   -0.24   -3.39  1.0000
   0  -1 -28   20462     756                                                       28208   -0.30   -5.55  1.0000
   0   1 -28   22261     888                                                       30073    0.07   -5.47  1.0000
   0   1 -28   22565    1380                                                       30427    0.07   -5.47  1.0000
   0  -1 -29     335     223                                                         817   -0.12   -3.87  1.0000
   0   1 -29     411     228                                                         485    0.65    4.55  1.0000
   0   1 -29     467     443                                                         596    0.65    4.55  1.0000
   0   1 -30   11257     475                                                        7140    0.13   -4.93  1.0000
   0   1 -30   11163     784                                                        7065    0.13   -4.93  1.0000
   0  -1 -30   11247     428                                                        7080   -0.29   -4.89  1.0000
   0  -1 -31     758     293                                                        2025   -0.22   -3.87  1.0000
   0   1 -31     300     304                                                        1367    0.34    4.42  1.0000
   0  -1 -32    1128     314                                                        2703   -0.56   -4.02  1.0000
   0   1 -32     890     346                                                        2404    0.10   -4.23  1.0000
   0   1 -33     673     342                                                        1881   -0.07    3.86  1.0000
   0  -1 -33    1154     337                                                        2424   -0.43   -3.40  1.0000
   0   1 -34    6149     541                                                        8652    0.05   -3.29  1.0000
   0  -1 -34    6512     514                                                        8990   -0.70   -3.03  1.0000
   0  -1 -35   15397     609                                                       12339   -0.59   -2.83  1.0000
   0   1 -35   15891     636                                                       12468   -0.26    3.16  1.0000
   0   1 -36    7612     488                                                        5995    0.03   -2.28  1.0000
   0  -1 -36    7571     456                                                        5995   -0.47   -2.06  1.0000
   0  -1 -37     385     281                                                         114   -0.53   -2.48  1.0000
   0   1 -37     550     300                                                         301   -0.17    2.66  1.0000
   0  -1 -38     206     280                                                         107   -0.03   -1.31  1.0000
   0   1 -38     665     298                                                         466    0.06   -1.43  1.0000
   0  -1 -39    1785     368                                                        2791   -0.21   -2.34  1.0000
   0   1 -39    2277     400                                                        3441   -0.05    2.41  1.0000
   0  -1 -40    3153     383                                                        3608    0.30   -0.86  1.0000
   0   1 -40    3515     415                                                        3993    0.17   -0.86  1.0000
   0   1 -41     255     251                                                          47   -0.13    2.21  1.0000
   0  -1 -41      97     278                                                        -299    0.22   -2.15  1.0000
   0   1 -42    3738     380                                                        3498    0.36   -0.52  1.0000
   0  -1 -42    3450     349                                                        3166    0.40   -0.64  1.0000
   0  -1 -43    4281     389                                                        5352    0.50   -1.75  1.0000
   0   1 -43    3961     405                                                        5094   -0.31    1.83  1.0000
   0   1 -44    4244     367                                                        4389    0.49   -0.36  1.0000
   0  -1 -44    4273     362                                                        4539    0.34   -0.53  1.0000
   0  -1 -45     277     195                                                         181    0.48   -1.18  1.0000
   0   1 -45     131     189                                                          28   -0.37    1.30  1.0000
   0  -1 -46    1384     221                                                        1284    0.28   -0.43  1.0000
   0  -1 -47     231     154                                                         147    0.28   -0.65  1.0000
   0   2   0  264940    1726                                                      281432    3.54   -0.90  1.0000
   0   2  -1  320249    1970                                                      366147    8.64    0.21  1.0000
   0   2   1  338694    1983                                                      365280   -4.89    0.95  1.0000
   0   2  -2  447010    2096                                                      421785    4.18   -0.77  1.0000
   0   2   2  447242    2140                                                      419321    4.71   -0.64  1.0000
   0   2  -3  263376    1393                                                      181561   19.15   -0.71  1.0000
   0   2  -4   29402     682                                                       39035    5.74   -0.11  1.0000
   0   2  -5    5133     149                                                        1274   23.28   -1.46  1.0000
   0   2  -6   62986     944                                                       77968    6.37    0.88  1.0000
   0   2  -6   63822    1042                                                       78899    6.37    0.88  1.0000
   0   2  -7  819924    3982                                                      999900   20.71   -1.71  1.0000
   0   2  -7  803560    3561                                                      981820   20.71   -1.71  1.0000
   0   2  -8   46741     725                                                       37923    5.26    1.74  1.0000
   0   2  -8   51637     862                                                       42354    5.26    1.74  1.0000
   0   2  -9  111061    1092                                                       74060   13.37   -1.47  1.0000
   0   2  -9  115003    1206                                                       77285   13.37   -1.47  1.0000
   0   2 -10  198036    1935                                                      211411    3.35    2.12  1.0000
   0   2 -10  197518    2026                                                      210876    3.35    2.12  1.0000
   0   2 -11   72799    1129                                                       64008    3.76   -1.00  1.0000
   0   2 -12   14335     542                                                       12244    2.12    1.97  1.0000
   0   2 -13    6687     588                                                       11710   -5.79   -0.51  1.0000
   0   2 -14   26610     859                                                       24142    2.01    1.55  1.0000
   0   2 -15   37971    1467                                                       64846  -13.31   -0.03  1.0000
   0   2 -16   77100    1702                                                       82651    2.32    1.13  1.0000
   0   2 -17  140542    1803                                                       87463  -17.45    0.47  1.0000
   0   2 -18   35962    1138                                                       32377    2.30    0.82  1.0000
   0   2 -19    2146     352                                                        1457  -18.15    0.95  1.0000
   0   2 -20   36073    1167                                                       32801    1.95    0.59  1.0000
   0   2 -21   33732    1674                                                       67196  -16.57    1.33  1.0000
   0   2 -22   27413    1196                                                       29898    1.67    0.39  1.0000
   0   2 -23    2856     381                                                         906  -14.20    1.49  1.0000
   0   2 -24   40226    1388                                                       37550    1.54    0.22  1.0000
   0   2 -25    7880    1072                                                       20325  -11.83    1.35  1.0000
   0  -2 -25    8241     585                                                       18952   10.54   -0.31  1.0000
   0  -2 -26   47544     961                                                       50584    1.54    0.20  1.0000
   0   2 -26   51808    1726                                                       54262    1.18    0.00  1.0000
   0   2 -26   51452    1219                                                       53898    1.18    0.00  1.0000
   0  -2 -27   13992     382                                                        6598    8.13   -0.64  1.0000
   0   2 -27   16756     754                                                        7624   -9.47    0.90  1.0000
   0   2 -27   15966     498                                                        7092   -9.47    0.90  1.0000
   0   2 -28    2286     342                                                        2463    0.41   -0.35  1.0000
   0   2 -28    2344     542                                                        2523    0.41   -0.35  1.0000
   0  -2 -28    1696     272                                                        2084    0.97    0.17  1.0000
   0   2 -29     510     435                                                         491   -7.00    0.33  1.0000
   0  -2 -29    1134     214                                                         318    5.79   -0.60  1.0000
   0   2 -29     515     267                                                         401   -7.00    0.33  1.0000
   0   2 -30   11961     654                                                       12289   -0.45   -0.80  1.0000
   0  -2 -30   11281     514                                                       11041    0.28    0.14  1.0000
   0   2 -30   10807     934                                                       11118   -0.45   -0.80  1.0000
   0   2 -31    4769     553                                                        8006   -4.65   -0.07  1.0000
   0  -2 -31    4923     458                                                        7437    3.65   -0.11  1.0000
   0   2 -31    4378     819                                                        7496   -4.65   -0.07  1.0000
   0   2 -32   30352     979                                                       29211   -0.91   -1.10  1.0000
   0   2 -32   27977    1410                                                       26881   -0.91   -1.10  1.0000
   0  -2 -32   27854     826                                                       27465   -0.23    0.25  1.0000
   0  -2 -33    1975     314                                                        1452    1.94    0.43  1.0000
   0   2 -33    2180     500                                                        1200   -2.81   -0.12  1.0000
   0   2 -33    2617     363                                                        1531   -2.81   -0.12  1.0000
   0  -2 -34   16261     658                                                       16851   -0.45    0.46  1.0000
   0   2 -34   16865     798                                                       17813   -0.90   -0.99  1.0000
   0  -2 -35    6536     471                                                        7057    0.74    0.58  1.0000
   0   2 -35    5970     545                                                        7124   -1.58    0.07  1.0000
   0  -2 -36    1471     328                                                        1663   -0.53    0.53  1.0000
   0   2 -36    1153     366                                                        1404   -0.75   -0.45  1.0000
   0   2 -37     284     295                                                         214   -0.75    0.26  1.0000
   0  -2 -37     487     299                                                         538   -0.05    0.32  1.0000
   0   2 -38    1858     351                                                        1572   -0.75    0.15  1.0000
   0  -2 -38    1653     334                                                        1419   -0.61    0.27  1.0000
   0  -2 -39    5412     453                                                        5786   -0.57   -0.04  1.0000
   0   2 -39    5287     473                                                        5263   -0.10    0.30  1.0000
   0  -2 -40    4405     419                                                        4758   -0.64   -0.20  1.0000
   0   2 -40    3813     434                                                        4354   -0.86    0.40  1.0000
   0   2 -41    4047     402                                                        3867    0.40    0.30  1.0000
   0  -2 -41    4667     395                                                        4130   -0.87   -0.19  1.0000
   0   2 -42    3726     358                                                        3255   -0.86    0.19  1.0000
   0  -2 -42    3720     354                                                        3492   -0.57   -0.58  1.0000
   0  -2 -43     866     257                                                        1134   -0.96   -0.14  1.0000
   0  -2 -44     507     215                                                         421   -0.44   -0.61  1.0000
   0  -2 -45     131     182                                                         217   -0.89   -0.06  1.0000
   0  -2 -46     368     174                                                         407   -0.32   -0.34  1.0000
   0  -2 -47    1262     174                                                        1053   -0.71   -0.04  1.0000
   0   3   1   37049     774                                                       36335    1.44   -0.30  1.0000
   0   3  -1   37993     759                                                       35659    1.65   -1.22  1.0000
   0   3  -2   39169     716                                                       32068    0.25    4.15  1.0000
   0   3   2   42015     733                                                       32674    0.22   -5.34  1.0000
   0   3  -3   40989     875                                                       46468    1.18   -3.16  1.0000
   0   3   3   46337     884                                                       47667    0.70   -0.81  1.0000
   0   3  -4    1900     330                                                        5859    0.13    7.57  1.0000
   0   3   4    1404     326                                                        5732   -0.20   -8.87  1.0000
   0   3   5    3643     243                                                        2487   -0.24   -3.22  1.0000
   0   3  -5    5575     232                                                        2474    0.26   -6.07  1.0000
   0   3  -6     822     141                                                         379    0.16    9.54  1.0000
   0   3   6    1181     149                                                         300   -0.63  -10.68  1.0000
   0   3  -7    3730     181                                                        1214   -0.63   -9.76  1.0000
   0   3   7    2152     189                                                        1025   -1.02   -7.23  1.0000
   0   3  -7    3447     185                                                         984   -0.63   -9.76  1.0000
   0   3  -8    1339     148                                                         201    0.46   10.53  1.0000
   0   3   8    1480     166                                                         190   -0.54  -11.22  1.0000
   0   3  -8    1166     144                                                         311    0.46   10.53  1.0000
   0   3  -9    8423     633                                                       23150   -1.16  -13.27  1.0000
   0   3  -9    8908     760                                                       23949   -1.16  -13.27  1.0000
   0   3   9    9533     735                                                       22430   -1.41  -11.39  1.0000
   0   3 -10   87985    1678                                                      119703    1.04   10.81  1.0000
   0   3 -10   87809    1501                                                      119497    1.04   10.81  1.0000
   0   3 -11   13241     300                                                        2706   -1.37  -15.20  1.0000
   0   3 -11   15191     326                                                        3693   -1.37  -15.20  1.0000
   0   3 -12   60842     973                                                       39913    1.75   10.18  1.0000
   0   3 -12   59234    1054                                                       38612    1.75   10.18  1.0000
   0   3 -13   94450    1876                                                      140152   -1.51  -14.68  1.0000
   0   3 -13   97340    2122                                                      143667   -1.51  -14.68  1.0000
   0   3 -14     545     330                                                        2591    2.24    8.61  1.0000
   0   3 -14     604     374                                                        2786    2.24    8.61  1.0000
   0   3 -15   13172     441                                                        3610   -1.68  -12.00  1.0000
   0   3 -15   10054     335                                                        2073   -1.68  -12.00  1.0000
   0   3 -16    1328     468                                                        4602    2.22    6.71  1.0000
   0   3 -16    1963     559                                                        5739    2.22    6.71  1.0000
   0   3 -17   40488    1041                                                       26616   -1.72   -8.28  1.0000
   0   3 -17   44982    1228                                                       30283   -1.72   -8.28  1.0000
   0   3 -18    1652     273                                                         272    1.68    5.13  1.0000
   0   3 -18    2719     359                                                         791    1.68    5.13  1.0000
   0   3 -19   58132    1966                                                       68900   -1.45   -4.53  1.0000
   0   3 -19   51793    1636                                                       61982   -1.45   -4.53  1.0000
   0   3 -20   29019    1278                                                       35514    0.91    3.90  1.0000
   0   3 -20   33877    1568                                                       40869    0.91    3.90  1.0000
   0   3 -21   79857    2206                                                       76682   -0.89   -1.15  1.0000
   0   3 -21   71714    1742                                                       68706   -0.89   -1.15  1.0000
   0   3 -22    4038     447                                                        2707    0.28    2.55  1.0000
   0   3 -22    4981     597                                                        3489    0.28    2.55  1.0000
   0   3 -23    2675     442                                                        2006   -0.21    1.71  1.0000
   0  -3 -23    2206     218                                                        1728   -0.28   -1.31  1.0000
   0   3 -23    2719     536                                                        2044   -0.21    1.71  1.0000
   0   3 -24     590     413                                                         404    0.08    0.93  1.0000
   0   3 -24      18     224                                                         -26    0.08    0.93  1.0000
   0   3 -24      18     344                                                         -63    0.08    0.93  1.0000
   0  -3 -24     253     163                                                          77   -0.20    1.58  1.0000
   0   3 -25   21513     993                                                       16745    0.42    3.78  1.0000
   0   3 -25   20757     754                                                       16079    0.42    3.78  1.0000
   0  -3 -25   19758     583                                                       15858    0.02   -3.23  1.0000
   0   3 -26    1946     486                                                        2149    0.34   -0.43  1.0000
   0  -3 -26    2362     282                                                        2107   -0.50    0.51  1.0000
   0   3 -26    2176     357                                                        2391    0.34   -0.43  1.0000
   0   3 -27   16719     925                                                       22951    0.98    4.78  1.0000
   0   3 -27   16937    1187                                                       23207    0.98    4.78  1.0000
   0  -3 -27   17024     715                                                       22399    0.17   -4.26  1.0000
   0  -3 -28    1015     264                                                        1094   -0.37   -0.12  1.0000
   0   3 -28     996     337                                                        1155    0.79   -0.86  1.0000
   0   3 -28    1023     482                                                        1184    0.79   -0.86  1.0000
   0   3 -29   10618     553                                                        6434    1.45    4.81  1.0000
   0  -3 -29    9173     422                                                        5777    0.14   -4.46  1.0000
   0   3 -29   10708     757                                                        6504    1.45    4.81  1.0000
   0   3 -30    4969     507                                                        4877    1.00   -0.37  1.0000
   0  -3 -30    4900     402                                                        4807    0.19   -0.19  1.0000
   0   3 -30    4550     658                                                        4461    1.00   -0.37  1.0000
   0   3 -31    2194     353                                                         959    1.68    4.33  1.0000
   0  -3 -31    2669     299                                                        1182    0.14   -4.15  1.0000
   0   3 -31    2530     479                                                        1201    1.68    4.33  1.0000
   0   3 -32    4170     666                                                        3946    0.69    0.38  1.0000
   0  -3 -32    4409     407                                                        4350    0.85    0.09  1.0000
   0   3 -32    4333     486                                                        4105    0.69    0.38  1.0000
   0   3 -33    2907     511                                                        5225    1.49    3.79  1.0000
   0  -3 -33    3148     441                                                        5257    0.24   -3.62  1.0000
   0  -3 -34    3636     411                                                        3815    1.12    0.42  1.0000
   0   3 -34    2789     445                                                        3165    0.01    0.77  1.0000
   0   3 -35     307     310                                                         212    0.86    3.21  1.0000
   0  -3 -35    1147     306                                                         669    0.25   -2.94  1.0000
   0   3 -36    1317     377                                                        1512   -0.60    0.74  1.0000
   0  -3 -36    2129     373                                                        2512    0.84    0.64  1.0000
   0  -3 -37    5997     495                                                        7531   -0.02   -2.10  1.0000
   0   3 -37    5313     548                                                        7027    0.04    2.46  1.0000
   0  -3 -38     719     295                                                         543    0.30    0.71  1.0000
   0  -3 -39    1407     303                                                         989   -0.51   -1.25  1.0000
   0  -3 -40       8     259                                                         -19   -0.14    0.61  1.0000
   0  -3 -41     400     248                                                         269   -0.86   -0.63  1.0000
   0  -3 -42     207     229                                                         156   -0.33    0.34  1.0000
   0  -3 -43    3099     319                                                        3410   -0.79   -0.38  1.0000
   0  -3 -44     278     194                                                         289   -0.34    0.05  1.0000
   0  -3 -45    5168     309                                                        4908   -0.38   -0.34  1.0000
   0  -3 -46     547     154                                                         516   -0.31   -0.09  1.0000
   0   4   0      91     484                                                        9362  -19.13    2.02  1.0000
   0   4  -1   29369     880                                                       34836    3.44   -0.15  1.0000
   0   4   1   36178     876                                                       35034    0.76    0.29  1.0000
   0   4   2     783     562                                                       13357  -19.36    2.34  1.0000
   0   4  -2     855     554                                                       12873  -18.47    1.52  1.0000
   0   4   3    7415     468                                                        9090   -1.98    0.50  1.0000
   0   4  -3    4931     464                                                        9089    5.53   -0.55  1.0000
   0   4   4    4363     199                                                         602  -18.63    2.26  1.0000
   0   4  -4    3006     181                                                         600  -17.36    1.07  1.0000
   0   4   5    1717     217                                                         778   -4.04    0.34  1.0000
   0   4  -5    2360     193                                                         619    6.48   -0.71  1.0000
   0   4   6     181     385                                                        5044  -16.43    1.61  1.0000
   0   4  -6      65     388                                                        5302  -15.33    0.87  1.0000
   0   4  -7    5657     510                                                       10177    5.88   -0.59  1.0000
   0   4   7    6781     527                                                       10518   -4.64    0.01  1.0000
   0   4   8     607     271                                                        1168  -12.72    0.54  1.0000
   0   4  -8     723     223                                                         975  -12.02    0.97  1.0000
   0   4  -8     615     214                                                        1154  -12.02    0.97  1.0000
   0   4  -9   45869     897                                                       38716    3.86   -0.27  1.0000
   0   4   9   46133    1094                                                       39679   -3.52   -0.13  1.0000
   0   4 -10     905     390                                                        4290   -7.79    1.11  1.0000
   0   4 -10    1291     369                                                        5096   -7.79    1.11  1.0000
   0   4 -11   14016     700                                                       15338    1.26    0.23  1.0000
   0   4 -11   16077     667                                                       17491    1.26    0.23  1.0000
   0   4 -12   52399    1252                                                       60146   -3.57    0.88  1.0000
   0   4 -12   47725    1334                                                       55130   -3.57    0.88  1.0000
   0   4 -13    2689     310                                                        2153   -0.94    0.81  1.0000
   0   4 -13    2316     324                                                        1820   -0.94    0.81  1.0000
   0   4 -14    6801     489                                                        6630   -0.23    0.10  1.0000
   0   4 -14    6027     518                                                        5866   -0.23    0.10  1.0000
   0   4 -15   45016    1296                                                       50022   -2.32    1.31  1.0000
   0   4 -15   48287    1511                                                       53467   -2.32    1.31  1.0000
   0   4 -16    6157     604                                                        7694    1.94   -0.92  1.0000
   0   4 -16    6696     676                                                        8296    1.94   -0.92  1.0000
   0   4 -17   74716    1669                                                       67100   -2.99    1.52  1.0000
   0   4 -17   80825    1916                                                       72896   -2.99    1.52  1.0000
   0   4 -18    6987     781                                                        9556    3.11   -1.65  1.0000
   0   4 -18    6310     678                                                        8759    3.11   -1.65  1.0000
   0   4 -19   11500     985                                                       14897   -3.05    1.34  1.0000
   0   4 -19    9836     820                                                       12993   -3.05    1.34  1.0000
   0   4 -20     237     371                                                         638    3.42   -1.77  1.0000
   0   4 -20     136     310                                                         365    3.42   -1.77  1.0000
   0   4 -21   11928     891                                                       14464   -2.35    0.85  1.0000
   0   4 -21   12862    1061                                                       15491   -2.35    0.85  1.0000
   0   4 -22     209     308                                                           0    2.88   -1.35  1.0000
   0   4  22     160     200                                                         -16    2.68    0.75  1.0000
   0   4 -23   83617    2010                                                       81381   -0.82    0.34  1.0000
   0   4  23   92283    1311                                                       88357    1.38   -0.61  1.0000
   0   4 -24    4085     520                                                        3175    1.64   -0.68  1.0000
   0   4  24    4840     340                                                        3986    1.40    0.96  1.0000
   0  -4 -25   39003     936                                                       39117    0.18    0.78  1.0000
   0   4  25   41127     922                                                       41244    0.18   -0.78  1.0000
   0   4 -25   39670    1482                                                       37971    0.95    0.08  1.0000
   0  -4 -26      24     239                                                         -14    0.23   -1.06  1.0000
   0   4  26     278     233                                                         392    0.23    1.06  1.0000
   0   4 -26     153     365                                                         180    0.24   -0.01  1.0000
   0   4 -27    4151     553                                                        3043    2.07    0.08  1.0000
   0  -4 -27    3378     347                                                        2941   -0.72    0.71  1.0000
   0   4 -28    6694     713                                                        6174   -0.73    0.50  1.0000
   0  -4 -28    7784     479                                                        7424   -0.47   -0.90  1.0000
   0   4 -29    6907     846                                                        8571    2.11    0.09  1.0000
   0  -4 -29    8403     540                                                        9281   -1.06    0.26  1.0000
   0   4 -30    5215     708                                                        5900   -0.98    0.73  1.0000
   0  -4 -30    5743     484                                                        6217   -0.67   -0.63  1.0000
   0  -4 -31   12650     614                                                       11773   -1.01   -0.44  1.0000
   0  -4 -32     129     297                                                         210   -0.55   -0.47  1.0000
   0  -4 -33   12541     628                                                       13230   -0.89   -1.03  1.0000
   0  -4 -34     255     311                                                         266   -0.14   -0.44  1.0000
   0  -4 -35     405     330                                                         547   -0.80   -1.18  1.0000
   0  -4 -36    1378     360                                                        1609    0.63   -0.32  1.0000
   0  -4 -37     290     302                                                         468   -0.62   -0.89  1.0000
   0  -4 -38    1298     326                                                        1877    1.60   -0.03  1.0000
   0  -4 -39    2910     350                                                        2962   -0.25   -0.42  1.0000
   0  -4 -40     120     254                                                         325    2.33    0.23  1.0000
   0  -4 -41   10253     492                                                       10422    0.17   -0.06  1.0000
   0  -4 -42      47     198                                                          19    2.38    0.24  1.0000
   0  -4 -43     266     184                                                         213    0.44    0.08  1.0000
   0  -4 -44      65     159                                                         -22    1.77    0.02  1.0000
   0  -4 -45       5     133                                                         -51    0.47    0.05  1.0000
   0   5  -1     327     222                                                         419   -0.37    6.94  1.0000
   0   5   1     177     232                                                         488   -0.61    6.99  1.0000
   0   5   2    4948     486                                                        7131    0.14   -3.12  1.0000
   0   5  -2    4164     496                                                        7351    0.96    4.57  1.0000
   0   5  -3   10657     470                                                        6588   -0.23    5.36  1.0000
   0   5   3   11047     481                                                        6766   -0.93    5.56  1.0000
   0   5   4    6681     353                                                        2767   -0.52   -6.55  1.0000
   0   5  -4    7340     338                                                        2632    1.00    7.50  1.0000
   0   5  -5   21237     890                                                       25424   -0.19    3.18  1.0000
   0   5   5   20988     892                                                       25415   -1.12    3.54  1.0000
   0   5   6    2805     550                                                        8586   -1.17   -8.78  1.0000
   0   5  -6    2589     542                                                        8546    0.89    9.10  1.0000
   0   5  -7     590     264                                                         940   -0.30    1.72  1.0000
   0   5   7     768     306                                                        1076   -0.90    2.10  1.0000
   0   5  -7     691     229                                                        1069   -0.30    1.72  1.0000
   0   5  -8    1758     218                                                          -6    0.80    9.19  1.0000
   0   5   8     787     284                                                         421   -1.60   -9.39  1.0000
   0   5  -8     743     192                                                         216    0.80    9.19  1.0000
   0   5  -9   18019     630                                                       16076   -0.62    1.75  1.0000
   0   5  -9   18089     747                                                       16142   -0.62    1.75  1.0000
   0   5 -10     113     297                                                        1017    0.80    8.09  1.0000
   0   5 -10     156     229                                                         789    0.80    8.09  1.0000
   0   5 -11   42938    1347                                                       48441   -0.95    3.00  1.0000
   0   5 -11   43268    1180                                                       48792   -0.95    3.00  1.0000
   0   5 -12   15269     976                                                       23432    0.79    6.44  1.0000
   0   5 -12   15747     867                                                       24023    0.79    6.44  1.0000
   0   5 -13   25672     924                                                       20013   -0.97    4.55  1.0000
   0   5 -13   25974     824                                                       20280   -0.97    4.55  1.0000
   0   5 -14    1976     254                                                         510    0.58    4.80  1.0000
   0   5 -14    1359     277                                                         224    0.58    4.80  1.0000
   0   5 -15   12505     956                                                       18625   -0.57    5.56  1.0000
   0   5 -15   12281     856                                                       18351   -0.57    5.56  1.0000
   0   5  16    7031     343                                                        4950   -0.28   -2.99  1.0000
   0   5 -16    7768     580                                                        5316    0.08    3.35  1.0000
   0   5 -16    7704     533                                                        5263    0.08    3.35  1.0000
   0   5  17     352     272                                                        1896    0.36    6.27  1.0000
   0   5 -17     275     377                                                        1640    0.10    5.82  1.0000
   0   5  18    2248     322                                                        2985   -0.09   -1.61  1.0000
   0   5 -18    1643     437                                                        2494   -0.55    2.13  1.0000
   0   5 -19   38440    1234                                                       29263    0.69    5.46  1.0000
   0   5  19   40426     810                                                       30816    0.41    5.62  1.0000
   0   5  20    1545     268                                                        1305   -0.13   -0.75  1.0000
   0   5 -20    1323     377                                                        1033   -1.07    1.33  1.0000
   0   5 -21   10018     916                                                       14698    0.99    4.55  1.0000
   0   5  21   11911     636                                                       16303    0.35    4.10  1.0000
   0   5 -22      65     348                                                        -126   -1.32    1.18  1.0000
   0   5  22      46     233                                                          41   -0.17   -0.55  1.0000
   0   5 -23     521     378                                                        1216    0.95    3.06  1.0000
   0   5  23    1015     296                                                        1657    0.06    2.13  1.0000
   0   5 -24      46     330                                                         187   -1.29    1.61  1.0000
   0   5  24     223     243                                                         359   -0.07   -0.90  1.0000
   0   5 -25      70     345                                                          66    0.68    1.11  1.0000
   0   5  25     240     251                                                         245   -0.21    0.23  1.0000
   0  -5 -26     672     258                                                         398    0.11    1.40  1.0000
   0   5  26     750     258                                                         459    0.11   -1.40  1.0000
   0   5 -26     617     374                                                         416   -1.03    2.18  1.0000
   0   5 -27     698     377                                                         673    0.34   -0.83  1.0000
   0  -5 -27     820     294                                                         577   -0.13    1.17  1.0000
   0   5  27    1248     288                                                         945   -0.13   -1.17  1.0000
   0  -5 -28    3457     449                                                        4417    0.18    1.68  1.0000
   0  -5 -29    4484     483                                                        5712    0.26    1.94  1.0000
   0  -5 -30     361     332                                                         709    0.06    1.71  1.0000
   0  -5 -31     944     327                                                         418    0.59    2.23  1.0000
   0  -5 -32     136     304                                                          48   -0.14    1.76  1.0000
   0  -5 -33     780     308                                                         305    0.59    2.22  1.0000
   0  -5 -34     374     320                                                         274   -0.21    1.97  1.0000
   0  -5 -35    1711     377                                                        2450    0.37    1.93  1.0000
   0  -5 -36    6709     444                                                        5278   -0.03    2.05  1.0000
   0  -5 -37    1773     313                                                        1332    0.22    1.31  1.0000
   0  -5 -38     506     276                                                         901    0.27    1.63  1.0000
   0  -5 -39    5010     375                                                        5368    0.23    0.52  1.0000
   0  -5 -40     469     223                                                         639    0.49    0.72  1.0000
   0  -5 -41     151     187                                                         173    0.27   -0.08  1.0000
   0  -5 -42     226     170                                                         188    0.48   -0.23  1.0000
   0  -5 -43    2322     220                                                        2409    0.21   -0.26  1.0000
   0  -5 -44     227     116                                                         144    0.30   -0.76  1.0000
   0   6   0     372     276                                                         574   -3.21    0.69  1.0000
   0   6  -1     948     301                                                        1043   -0.26   -0.67  1.0000
   0   6   1    1108     290                                                         853    0.37   -1.16  1.0000
   0   6   2    1569     329                                                        1375   -2.63    1.04  1.0000
   0   6  -2    1824     305                                                        1217   -2.47    0.23  1.0000
   0   6  -3    4370     473                                                        4895   -0.89   -0.10  1.0000
   0   6   3    3989     480                                                        4788    1.01   -1.49  1.0000
   0   6  -4     688     265                                                         510   -0.79   -0.16  1.0000
   0   6   4     963     304                                                         685   -1.17    1.19  1.0000
   0   6   5     367     296                                                         549    1.58   -1.71  1.0000
   0   6  -5     324     272                                                         547   -1.37    0.36  1.0000
   0   6  -6    6753     535                                                        6110    0.80   -0.44  1.0000
   0   6   6    6672     585                                                        6290    0.29    1.19  1.0000
   0   6   7   17396     562                                                       15879    1.81   -1.86  1.0000
   0   6  -7   17835     831                                                       16339   -1.40    0.60  1.0000
   0   6   7   19552     927                                                       17948    1.81   -1.86  1.0000
   0   6  -8    1188     356                                                        1708    1.37   -0.67  1.0000
   0   6   8    1464     258                                                        1999    0.96    1.09  1.0000
   0   6   9    9003     472                                                        9842    1.43   -1.84  1.0000
   0   6  -9    9172     671                                                        9666   -0.74    0.72  1.0000
   0   6 -10     166     269                                                         118    0.71   -0.97  1.0000
   0   6  10     207     203                                                         159    0.63    0.83  1.0000
   0   6 -11    1917     406                                                        2055    0.54    0.88  1.0000
   0   6  11    2422     279                                                        2151    0.39   -1.52  1.0000
   0   6  12     677     243                                                         599   -0.36    0.37  1.0000
   0   6  13     164     227                                                         385   -1.12   -0.99  1.0000
   0   6  14    3742     321                                                        3006   -1.41   -0.14  1.0000
   0   6  15    8832     432                                                        6590   -2.77   -0.56  1.0000
   0   6  16   15390     665                                                       17898   -2.10   -0.40  1.0000
   0   6  17   11549     635                                                       16037   -4.24   -0.42  1.0000
   0   6  18    5894     402                                                        4369   -2.33   -0.34  1.0000
   0   6  19     575     252                                                         -22   -5.25   -0.53  1.0000
   0   6  20     445     294                                                         957   -2.19   -0.19  1.0000
   0   6  21    4937     347                                                        2019   -5.53   -0.67  1.0000
   0   6  22    2343     385                                                        3189   -1.81   -0.20  1.0000
   0   6  23    1456     391                                                        3563   -5.01   -0.65  1.0000
   0   6  24   10625     537                                                        9405   -1.31   -0.30  1.0000
   0   6  25     820     316                                                        1190   -3.93   -0.46  1.0000
   0   6  26    4957     433                                                        5508   -0.81   -0.23  1.0000
   0   6  27    1149     343                                                        2134   -2.78   -0.18  1.0000
   0  -6 -27     772     351                                                        1605   -2.78    0.18  1.0000
   0  -6 -28      25     324                                                          44   -0.37   -0.10  1.0000
   0  -6 -29    3646     480                                                        4747   -1.89   -0.08  1.0000
   0  -6 -30    1442     372                                                        1489    0.01   -0.40  1.0000
   0  -6 -31    4778     448                                                        4111   -1.23   -0.25  1.0000
   0  -6 -32    2064     367                                                        1862    0.41   -0.36  1.0000
   0  -6 -33    1777     342                                                        1932   -0.59   -0.32  1.0000
   0  -6 -34     892     306                                                        1118    0.80    0.00  1.0000
   0  -6 -35    2457     341                                                        2499    0.04   -0.34  1.0000
   0  -6 -36     231     258                                                         400    1.04    0.30  1.0000
   0  -6 -37     521     241                                                         619    0.38   -0.36  1.0000
   0  -6 -38    1542     236                                                        1237    1.02    0.29  1.0000
   0  -6 -39    1524     220                                                        1403    0.26   -0.38  1.0000
   0  -6 -40     373     173                                                         511    0.79    0.04  1.0000
   0  -6 -41     691     163                                                         702   -0.14   -0.35  1.0000
   0  -6 -42       7     111                                                          -3    0.54   -0.17  1.0000
   0   7   1    1186     409                                                        2252   -1.15    2.64  1.0000
   0   7  -1    1154     319                                                        2175   -1.22    2.54  1.0000
   0   7  -1    1174     419                                                        2203   -1.22    2.54  1.0000
   0   7   1    1093     320                                                        2123   -1.15    2.64  1.0000
   0   7  -2   29804     822                                                       27787    0.26   -1.35  1.0000
   0   7   2   28936     798                                                       27372    0.62    1.12  1.0000
   0   7   2   29720    1169                                                       28135    0.62    1.12  1.0000
   0   7  -2   29598    1132                                                       27588    0.26   -1.35  1.0000
   0   7  -3    2158     373                                                        1410   -1.11    3.12  1.0000
   0   7  -3    2477     314                                                        1681   -1.11    3.12  1.0000
   0   7   3    2717     419                                                        1641   -1.00    3.29  1.0000
   0   7   3    2491     288                                                        1462   -1.00    3.29  1.0000
   0   7   4   29435    1319                                                       33423    0.27    2.54  1.0000
   0   7  -4   27837     887                                                       31866   -0.37   -2.54  1.0000
   0   7   4   28447     860                                                       32369    0.27    2.54  1.0000
   0   7  -4   27032    1188                                                       31004   -0.37   -2.54  1.0000
   0   7   5    1720     265                                                         829   -0.88    4.01  1.0000
   0   7   5    1910     400                                                         973   -0.88    4.01  1.0000
   0   7  -5     815     325                                                         676   -0.86    3.96  1.0000
   0   7  -5    1067     280                                                         968   -0.86    3.96  1.0000
   0   7   6    2181     274                                                         996   -0.16    3.93  1.0000
   0   7  -6    2192     285                                                         935   -0.93   -3.60  1.0000
   0   7   7     600     306                                                        1835   -0.81    4.30  1.0000
   0   7  -7     469     306                                                        1621   -0.52    4.38  1.0000
   0   7   8     501     248                                                         -16   -0.56    4.89  1.0000
   0   7  -8     716     232                                                         151   -1.27   -4.23  1.0000
   0   7  -9     132     287                                                         875   -0.10    4.01  1.0000
   0   7   9     227     283                                                        1107   -0.65    3.96  1.0000
   0   7  10    3259     446                                                        6484   -0.93    5.10  1.0000
   0   7  11    3727     426                                                        5664   -0.25    3.19  1.0000
   0   7  12    8008     403                                                        4627   -1.24    4.56  1.0000
   0   7  13    5165     394                                                        3842    0.31    2.37  1.0000
   0   7  14    9324     612                                                       12847   -1.33    3.49  1.0000
   0   7  15     416     316                                                         767    0.74    1.75  1.0000
   0   7  16    1787     320                                                        1063   -1.07    2.22  1.0000
   0   7  17    1196     329                                                         800    0.81    1.34  1.0000
   0   7  18     471     301                                                         305   -0.55    0.97  1.0000
   0   7  19     544     337                                                         794    0.59    0.89  1.0000
   0   7  20    1196     358                                                        1197   -0.03   -0.02  1.0000
   0   7  21     863     335                                                         888    0.33    0.25  1.0000
   0   7  22    7832     536                                                        8314    0.25   -0.55  1.0000
   0   7  23    1976     369                                                        2207    0.20   -0.53  1.0000
   0   7  24    1813     343                                                        1598    0.27   -0.58  1.0000
   0   7  25     122     290                                                         264    0.08   -1.17  1.0000
   0   7  26    7060     459                                                        6820    0.06   -0.31  1.0000
   0  -7 -26    6766     501                                                        6531    0.06    0.31  1.0000
   0  -7 -27     222     338                                                          88   -0.15    1.46  1.0000
   0   7  27    1095     292                                                         782   -0.15   -1.46  1.0000
   0  -7 -28    1400     356                                                        1369   -0.27    0.05  1.0000
   0  -7 -29      55     316                                                           7   -0.41    1.36  1.0000
   0  -7 -30     130     287                                                         194   -0.60   -0.07  1.0000
   0  -7 -31     107     276                                                         145   -0.47    1.06  1.0000
   0  -7 -32     430     262                                                         425   -0.76   -0.15  1.0000
   0  -7 -33     106     242                                                         103   -0.24    0.75  1.0000
   0  -7 -34     954     247                                                         822   -0.67   -0.30  1.0000
   0  -7 -35    1318     252                                                        1509    0.09    0.55  1.0000
   0  -7 -36    2275     265                                                        2510   -0.41   -0.42  1.0000
   0  -7 -37    1204     195                                                        1041    0.26    0.48  1.0000
   0  -7 -38    2101     198                                                        1959   -0.16   -0.32  1.0000
   0  -7 -39      76     119                                                         120    0.20    0.50  1.0000
   0   8   0   34580     888                                                       27872    4.20    0.25  1.0000
   0   8  -1    1492     365                                                        1585    0.29    0.15  1.0000
   0   8   1    1315     344                                                        1292    0.06   -0.12  1.0000
   0   8  -2    2889     453                                                        4924    3.77   -0.05  1.0000
   0   8   2    2775     456                                                        4914    3.89    0.42  1.0000
   0   8  -3      70     281                                                          57    0.58    0.25  1.0000
   0   8   3     125     294                                                         133   -0.42   -0.48  1.0000
   0   8   4    4041     485                                                        6030    3.09    0.34  1.0000
   0   8  -4    4368     496                                                        6194    2.76   -0.31  1.0000
   0   8   5    2967     375                                                        2384   -1.23   -0.77  1.0000
   0   8  -5    3074     389                                                        2553    1.07    0.28  1.0000
   0   8   6    5429     417                                                        4081    2.22    0.03  1.0000
   0   8  -6    5083     442                                                        4006    1.71   -0.43  1.0000
   0   8  -7     872     340                                                        1315    1.60    0.35  1.0000
   0   8   7     953     342                                                        1570   -2.08   -0.90  1.0000
   0   8   8    8583     565                                                        9911    1.64   -0.30  1.0000
   0   8  -8    8762     609                                                        9778    1.11   -0.33  1.0000
   0   8  -9     848     346                                                        1427    1.85    0.47  1.0000
   0   8   9     924     358                                                        1815   -2.53   -0.94  1.0000
   0   8  10    3547     391                                                        2954    1.46   -0.43  1.0000
   0   8  11      87     312                                                         426   -2.34   -0.99  1.0000
   0   8  12     532     321                                                         271    1.46   -0.30  1.0000
   0   8  13     775     327                                                         457   -1.65   -0.96  1.0000
   0   8  14    1574     392                                                        2017    1.30   -0.11  1.0000
   0   8  15     886     343                                                         665   -0.81   -0.72  1.0000
   0   8  16    1737     377                                                        1540    0.78   -0.06  1.0000
   0   8  17     366     338                                                         397   -0.09   -0.25  1.0000
   0   8  18    2800     420                                                        2811    0.08   -0.20  1.0000
   0   8  19     769     341                                                         692    0.37    0.25  1.0000
   0   8  20    1802     387                                                        1963   -0.40   -0.33  1.0000
   0   8  21    1062     326                                                         906    0.56    0.58  1.0000
   0   8  22    2134     358                                                        2320   -0.35   -0.30  1.0000
   0   8  23     267     290                                                         350    0.57    0.68  1.0000
   0   8  24    2445     337                                                        2453    0.08   -0.12  1.0000
   0  -8 -25    2091     355                                                        2327    0.48   -0.60  1.0000
   0   8  25    2271     322                                                        2517    0.48    0.60  1.0000
   0  -8 -26      29     294                                                          16    0.51   -0.05  1.0000
   0  -8 -27     298     279                                                         355    0.39   -0.39  1.0000
   0  -8 -28     196     268                                                         285    0.64   -0.09  1.0000
   0  -8 -29     693     261                                                         620    0.31   -0.07  1.0000
   0  -8 -30     838     255                                                         961    0.47   -0.05  1.0000
   0  -8 -31     501     223                                                         465    0.16    0.28  1.0000
   0  -8 -32    3072     279                                                        2962    0.23   -0.01  1.0000
   0  -8 -33     167     173                                                         218   -0.11    0.50  1.0000
   0  -8 -34     822     181                                                         837    0.07    0.00  1.0000
   0  -8 -35     568     145                                                         478   -0.39    0.50  1.0000
   0   9  -1     129     342                                                         307   -1.99    0.69  1.0000
   0   9   1     182     328                                                         335   -1.80    0.68  1.0000
   0   9   2    5173     476                                                        4858    0.11    0.53  1.0000
   0   9  -2    4955     487                                                        4651   -0.03   -0.49  1.0000
   0   9  -3    3537     474                                                        3750   -1.88    0.36  1.0000
   0   9   3    3610     443                                                        3820   -1.35    0.39  1.0000
   0   9   4    6048     514                                                        6551    0.13    0.78  1.0000
   0   9  -4    6189     561                                                        6630   -0.09   -0.61  1.0000
   0   9  -5    1382     396                                                        1535   -1.52   -0.26  1.0000
   0   9   5    1817     386                                                        1866   -0.75   -0.05  1.0000
   0   9   6    4356     446                                                        3998    0.01    0.64  1.0000
   0   9  -6    4162     477                                                        3912   -0.20   -0.39  1.0000
   0   9  -7      37     330                                                         -35   -1.03   -0.86  1.0000
   0   9   7     201     328                                                         141   -0.19   -0.51  1.0000
   0   9  -8       3     332                                                         -43   -0.37   -0.13  1.0000
   0   9   8     364     331                                                         311   -0.20    0.31  1.0000
   0   9   9     613     348                                                         805    0.18   -0.80  1.0000
   0   9  10    4341     457                                                        4455   -0.36    0.10  1.0000
   0   9  11     384     339                                                         558    0.29   -0.85  1.0000
   0   9  12    2531     402                                                        2402   -0.39    0.15  1.0000
   0   9  13    2487     397                                                        2144    0.28   -0.77  1.0000
   0   9  14    1914     397                                                        2114   -0.36    0.39  1.0000
   0   9  15     170     347                                                         282    0.30   -0.81  1.0000
   0   9  16    1438     355                                                        1232   -0.38    0.62  1.0000
   0   9  17      72     307                                                         189    0.42   -1.10  1.0000
   0   9  18     120     294                                                          64   -0.42    0.65  1.0000
   0   9  19      48     281                                                         -28    0.52   -1.43  1.0000
   0   9  20    2602     347                                                        2876   -0.42    0.45  1.0000
   0   9  21      78     256                                                         249    0.47   -1.46  1.0000
   0   9  22     966     259                                                         882   -0.35    0.18  1.0000
   0   9  23    1490     252                                                        1156    0.24   -1.02  1.0000
   0  -9 -23     717     242                                                         491    0.24    1.02  1.0000
   0  -9 -24       2     249                                                        -197   -0.28   -0.07  1.0000
   0  -9 -25       2     239                                                        -286   -0.07    0.32  1.0000
   0  -9 -26      94     205                                                         116   -0.23   -0.22  1.0000
   0  -9 -27    1170     225                                                        1078   -0.36   -0.28  1.0000
   0  -9 -28    2607     250                                                        2360   -0.18   -0.51  1.0000
   0  -9 -29     137     160                                                         233   -0.54   -0.58  1.0000
   0  -9 -30    2900     240                                                        3266   -0.08   -0.73  1.0000
   0  -9 -31     118     127                                                         175   -0.57   -0.62  1.0000
   0  10   0    1374     395                                                        1788   -0.36   -1.31  1.0000
   0  10   1     801     356                                                         759   -0.20    0.09  1.0000
   0  10  -1     926     361                                                         937   -0.06    0.07  1.0000
   0  10  -2    3936     465                                                        3935   -0.49   -1.46  1.0000
   0  10   2    3177     428                                                        2984   -0.21   -0.94  1.0000
   0  10  -3    2154     413                                                        2163    0.04    0.24  1.0000
   0  10   3    2019     404                                                        2159   -0.32    0.21  1.0000
   0  10   4     120     326                                                         157   -0.15   -0.47  1.0000
   0  10  -4      17     327                                                          85   -0.45   -1.31  1.0000
   0  10   5    1448     375                                                        1568   -0.36    0.23  1.0000
   0  10  -5    1371     373                                                        1417    0.07    0.49  1.0000
   0  10  -6    4397     457                                                        4427   -0.19   -0.90  1.0000
   0  10   6    3794     440                                                        3891   -0.17   -0.02  1.0000
   0  10   7    3453     416                                                        3304   -0.29    0.04  1.0000
   0  10   8    2081     374                                                        2045   -0.23    0.27  1.0000
   0  10   9      71     302                                                          92   -0.10   -0.25  1.0000
   0  10  10    1972     361                                                        2059   -0.31    0.33  1.0000
   0  10  11       5     298                                                         -62    0.17   -0.46  1.0000
   0  10  12       4     284                                                         -96   -0.37    0.23  1.0000
   0  10  13      81     275                                                          42    0.42   -0.52  1.0000
   0  10  14     953     278                                                         875   -0.32    0.09  1.0000
   0  10  15     353     252                                                         321    0.58   -0.46  1.0000
   0  10  16    1746     285                                                        1778   -0.10    0.02  1.0000
   0  10  17     667     243                                                         812    0.71   -0.36  1.0000
   0  10  18    2422     276                                                        2520    0.22    0.01  1.0000
   0  10  19     222     208                                                         361    0.87   -0.23  1.0000
   0 -10 -20       3     196                                                        -198    0.41    0.02  1.0000
   0 -10 -21     229     174                                                         112    1.05    0.06  1.0000
   0 -10 -22     729     184                                                         664    0.32    0.08  1.0000
   0 -10 -23     323     169                                                         521    1.11   -0.09  1.0000
   0 -10 -24    2090     204                                                        2072    0.00    0.15  1.0000
   0 -10 -25     469     132                                                         307    0.92   -0.14  1.0000
   0  11  -1    2012     303                                                        2146    0.53   -0.37  1.0000
   0  11   1    2113     311                                                        2191    0.53   -0.23  1.0000
   0  11   2    2512     333                                                        2503   -0.28   -0.03  1.0000
   0  11   3    1571     295                                                        1503    0.38   -0.09  1.0000
   0  11   4     596     263                                                         680   -0.46    0.18  1.0000
   0  11   5     282     240                                                         295    0.09   -0.03  1.0000
   0  11   6       7     215                                                         -19   -0.51    0.31  1.0000
   0  11   7     585     240                                                         581   -0.23   -0.06  1.0000
   0  11   8     214     209                                                         274   -0.38    0.34  1.0000
   0  11   9     811     222                                                         793   -0.44   -0.17  1.0000
   0  11  10     138     194                                                         180   -0.21    0.31  1.0000
   0  11  11    1065     223                                                        1101   -0.47   -0.26  1.0000
   0  11  12    2028     233                                                        1917   -0.11    0.25  1.0000
   0  11  13     767     194                                                         758   -0.40   -0.25  1.0000
   0  11  14     745     175                                                         798   -0.09    0.19  1.0000
  -1   0   1   25836     249                                                       13908   -0.30   -9.44  1.0000
  -1   0   2  260096    1188                                                      340489  -16.17   -0.42  1.0000
  -1   0   3  153719     571                                                       79324    0.88  -24.27  1.0000
  -1   0   4  521062    1243                                                      372355  -24.54   -1.13  1.0000
  -1   0   5   63888     894                                                      156630    1.85  -31.49  1.0000
  -1   0  -5   67100    1152                                                      159938   -1.88   30.93  1.0000
  -1   0  -6   86239    1211                                                      161766   24.30    2.48  1.0000
  -1   0  -7   16465     188                                                        2651   -2.35   30.35  1.0000
  -1   0  -8  120812    1533                                                      176377   15.94    1.12  1.0000
  -1   0  -9    1226     570                                                       20116   -2.58   24.46  1.0000
  -1   0 -10    7996     333                                                        5288    3.96   -0.50  1.0000
  -1   0 -11   61785    1540                                                      104764   -2.15   16.52  1.0000
  -1   0 -12   20991     910                                                       31581   -7.13   -1.43  1.0000
  -1   0 -13   28787     711                                                       16772   -1.07    8.84  1.0000
  -1   0 -14   24190    1225                                                       48711  -14.88   -1.35  1.0000
  -1   0 -15   21748     797                                                       18287    0.11    2.71  1.0000
  -1   0 -16    7354     238                                                         -62  -18.85   -0.72  1.0000
  -1   0 -17  136623    2108                                                      132925    0.84   -1.17  1.0000
  -1   0 -18   19391     397                                                        3111  -19.60   -0.18  1.0000
  -1   0 -19     938     288                                                         302    0.98   -2.81  1.0000
  -1   0 -20   73338    2195                                                      123613  -17.94   -0.06  1.0000
  -1   0 -21   18761    1006                                                       22536    0.78   -2.94  1.0000
  -1   0 -22   24176     666                                                        8125  -14.89   -0.19  1.0000
  -1   0 -23    3508     573                                                        5031    0.58   -2.51  1.0000
  -1   0 -24    1029     666                                                        7183  -11.60   -0.27  1.0000
  -1   0 -25   33454    1406                                                       36729    0.55   -1.98  1.0000
   1   0 -26    2592     452                                                        7946    8.51   -1.24  1.0000
  -1   0 -26    2873     757                                                        8685   -9.00   -0.10  1.0000
  -1   0 -27   15815     938                                                       14439    0.65   -1.29  1.0000
   1   0 -27   15954     575                                                       13835    0.15   -1.93  1.0000
  -1   0 -27   14978     530                                                       13640    0.65   -1.29  1.0000
   1   0 -28   54319     986                                                       41493    6.43   -0.65  1.0000
  -1   0 -28   56216     925                                                       41887   -7.24    0.26  1.0000
  -1   0 -28   59081    1620                                                       44365   -7.24    0.26  1.0000
   1   0 -29    2193     298                                                        1813    0.21   -0.99  1.0000
  -1   0 -29    2397     543                                                        2287    0.71   -0.40  1.0000
  -1   0 -29    2136     271                                                        2031    0.71   -0.40  1.0000
   1   0 -30   10798     652                                                       15810    4.88   -0.12  1.0000
  -1   0 -30   10742    1090                                                       16766   -5.88    0.65  1.0000
  -1   0 -30   10173     622                                                       16051   -5.88    0.65  1.0000
  -1   0 -31     896     245                                                         927    0.55    0.34  1.0000
   1   0 -31     824     269                                                         805    0.35    0.06  1.0000
  -1   0 -31    1054     476                                                        1089    0.55    0.34  1.0000
  -1   0 -32    3512     427                                                        6336   -4.46    0.87  1.0000
   1   0 -32    3616     464                                                        5884    3.65    0.25  1.0000
   1   0 -33     964     292                                                         837    0.44    0.74  1.0000
  -1   0 -33    1039     249                                                         931    0.21    0.51  1.0000
   1   0 -34    1295     353                                                        2296    2.61    0.49  1.0000
  -1   0 -34    1289     327                                                        2474   -2.96    0.86  1.0000
  -1   0 -35    2840     339                                                        2899   -0.10    0.11  1.0000
   1   0 -35    2368     375                                                        2732    0.42    0.82  1.0000
   1   0 -36    3073     415                                                        3806    1.67    0.59  1.0000
  -1   0 -36    3162     381                                                        3937   -1.68    0.67  1.0000
   1   0 -37     929     312                                                         783    0.37    0.51  1.0000
  -1   0 -37     622     251                                                         732   -0.14   -0.45  1.0000
   1   0 -38   12417     623                                                       11760    0.75    0.49  1.0000
  -1   0 -38   12650     563                                                       11931   -0.79    0.46  1.0000
   1   0 -39     348     316                                                         400    0.39    0.16  1.0000
  -1   0 -39     359     242                                                         457    0.09   -0.74  1.0000
   1   0 -40     471     308                                                         492   -0.11    0.18  1.0000
  -1   0 -40     277     214                                                         243   -0.22    0.34  1.0000
  -1   0 -41     267     214                                                         335    0.36   -0.64  1.0000
   1   0 -41     562     301                                                         536    0.43   -0.06  1.0000
  -1   0 -42     897     231                                                         885    0.17    0.30  1.0000
   1   0 -42    1248     309                                                        1020   -0.71   -0.23  1.0000
   1   0 -43    1325     308                                                        1376    0.37   -0.12  1.0000
  -1   0 -43    1046     229                                                        1150    0.47   -0.31  1.0000
   1   0 -44    1526     310                                                        1737   -0.87   -0.50  1.0000
  -1   0 -44    1269     223                                                        1427    0.40    0.28  1.0000
   1   0 -45    1240     274                                                        1225    0.17   -0.06  1.0000
   1   0 -46    1256     244                                                        1117   -0.70   -0.52  1.0000
   1   0 -47      26     173                                                          24   -0.02    0.07  1.0000
   1   0 -48      40     138                                                          70   -0.48   -0.29  1.0000
   1   1 -46    2162     255                                                        1774   -0.29   -0.97  1.0000
   1   1 -45    1888     283                                                        1958    0.35    0.21  1.0000
  -1  -1 -45    2052     231                                                        2063   -0.11   -0.22  1.0000
   1   1 -44     616     269                                                         797    0.12   -1.19  1.0000
  -1  -1 -44     911     202                                                        1074    0.19    0.64  1.0000
   1   1 -43      58     261                                                          64   -0.03    0.12  1.0000
  -1  -1 -43     240     187                                                         287   -0.47   -0.21  1.0000
  -1  -1 -42    3784     338                                                        4281    0.04    0.86  1.0000
   1   1 -42    3432     424                                                        4375    0.47   -1.60  1.0000
  -1  -1 -41    1711     272                                                        1728   -0.71   -0.15  1.0000
   1   1 -41    1906     369                                                        1945   -0.42   -0.01  1.0000
  -1  -1 -40    6015     391                                                        5130    0.14    1.30  1.0000
   1   1 -40    7174     482                                                        5553    0.50   -2.21  1.0000
   1   1 -39     191     313                                                         281   -0.58   -0.29  1.0000
  -1  -1 -39      61     225                                                         112   -0.64   -0.15  1.0000
   1   1 -38    4880     525                                                        6307    0.05   -2.80  1.0000
  -1  -1 -38    4358     419                                                        5717    0.61    2.02  1.0000
  -1  -1 -37    3103     349                                                        3035   -0.22   -0.28  1.0000
   1   1 -37    3822     436                                                        3551   -0.41   -0.82  1.0000
   1   1 -36    1739     338                                                         880   -0.72   -3.16  1.0000
  -1  -1 -36    1627     268                                                         807    1.26    2.92  1.0000
   1   1 -35    1285     374                                                        1635   -0.13   -1.49  1.0000
  -1  -1 -35    1091     279                                                        1288    0.27   -0.61  1.0000
  -1  -1 -34    4524     310                                                        2442    1.55    3.71  1.0000
   1   1 -34    3947     374                                                        2262   -1.32   -3.27  1.0000
  -1  -1 -33   13739     608                                                       15193    0.41   -1.27  1.0000
   1   1 -33   11969     696                                                       14048   -0.05   -2.15  1.0000
  -1  -1 -32   16070     696                                                       21251    1.00    4.16  1.0000
   1   1 -32   18423     828                                                       21883   -1.24   -3.24  1.0000
   1   1 -31    3304     371                                                        2944   -0.29   -2.83  1.0000
  -1  -1 -31    4180     320                                                        3661    0.02   -2.41  1.0000
   1   1 -30    2938     324                                                        1794   -0.39   -3.20  1.0000
  -1  -1 -30    4754     288                                                        2549   -0.34    4.19  1.0000
   1   1 -29    1764     337                                                        2135   -0.59   -3.70  1.0000
  -1  -1 -29    2197     289                                                        2697   -0.65   -3.97  1.0000
   1   1 -28    1519     337                                                        2412    0.79   -3.15  1.0000
  -1  -1 -28     972     268                                                        2486   -1.82    3.87  1.0000
   1   1 -27    2146     325                                                        2482   -0.71   -4.70  1.0000
  -1  -1 -27    1880     258                                                        2422   -1.15   -5.39  1.0000
   1   1 -26   18259     765                                                       21412    1.84   -2.99  1.0000
  -1  -1 -26   16750    1121                                                       21216   -2.76    3.26  1.0000
  -1  -1 -25    8723     605                                                        4603   -1.19   -6.00  1.0000
  -1  -1 -24   71933    1846                                                       66749   -3.00    2.26  1.0000
  -1  -1 -23    1921     508                                                        2944   -0.73   -5.64  1.0000
   1   1 -23    1622     506                                                        2327   -0.30   -5.58  1.0000
   1   1 -22   23260    1137                                                       23050    3.63   -1.71  1.0000
  -1  -1 -22   24527    1088                                                       24763   -2.91    0.63  1.0000
  -1  -1 -21   10795     655                                                        7875    0.26   -4.87  1.0000
   1   1 -21   11027     713                                                        7807    0.44   -5.22  1.0000
   1   1 -20    5292     485                                                        2889    4.51    0.01  1.0000
  -1  -1 -20    5129     474                                                        3412   -2.69   -1.83  1.0000
   1   1 -19   13368     973                                                       18608    1.94   -4.95  1.0000
  -1  -1 -19   14522     921                                                       19455    1.76   -4.54  1.0000
  -1  -1 -18   35629    1347                                                       44988   -1.97   -5.07  1.0000
   1   1 -18   41479    1412                                                       44743    4.71    2.83  1.0000
   1   1 -17   33131    1337                                                       41318    4.10   -5.46  1.0000
  -1  -1 -17   33402    1236                                                       41067    3.59   -5.11  1.0000
   1   1 -16   91993    1779                                                       78877    3.52    6.64  1.0000
  -1  -1 -16   97775    1615                                                       78175   -0.15   -8.66  1.0000
  -1  -1 -15   11624     609                                                       10168    5.29   -6.73  1.0000
   1   1 -15   11226     671                                                       10064    6.10   -7.23  1.0000
  -1  -1 -14   27089    1078                                                       36390    2.97  -11.91  1.0000
   1   1 -14   21858    1210                                                       37437    0.72   10.92  1.0000
   1   1 -13     162     349                                                        1950    6.84  -10.48  1.0000
  -1  -1 -13      23     319                                                        2225    6.22   -9.58  1.0000
   1   1 -12   16545     429                                                        3871   -3.51   14.71  1.0000
  -1  -1 -12   17774     393                                                        4352    7.04  -14.01  1.0000
  -1  -1 -11   16098     614                                                       13243    5.64  -13.93  1.0000
   1   1 -11   14621     652                                                       11609    5.51  -15.13  1.0000
  -1  -1 -10     368     517                                                       10345   11.45  -14.25  1.0000
   1   1 -10    4853     553                                                        9288   -8.80   16.83  1.0000
  -1   1   9   35719     908                                                       59120    5.27  -20.73  1.0000
  -1  -1  -9   35584    1142                                                       58444    2.79  -19.32  1.0000
  -1   1   8   98940    1357                                                      159321   16.88  -12.57  1.0000
   1   1  -8   95645    1859                                                      153124  -14.34   16.20  1.0000
   1   1  -7  168983    2100                                                      233735   -4.38  -24.28  1.0000
  -1   1   7  162127    1579                                                      236017   -1.30  -25.57  1.0000
  -1   1   6  126072    1157                                                      137746   19.00   -7.98  1.0000
   1   1  -6  131081    1429                                                      138893  -18.30   12.41  1.0000
  -1   1   5  578820    2489                                                      651724  -10.21  -26.52  1.0000
   1   1  -5  571007    2660                                                      647804  -12.27  -24.17  1.0000
  -1  -1  -4   54405     679                                                       39410   14.78   -2.55  1.0000
   1   1  -4   49871     568                                                       40998  -18.17    6.47  1.0000
  -1   1   4   55604     621                                                       39538   16.94   -2.21  1.0000
  -1   1   3  231481    1061                                                      124401  -19.22  -20.95  1.0000
  -1  -1  -3  220175    1028                                                      121395  -19.27  -18.56  1.0000
  -1   1   2  196270    1394                                                      222111    9.82    2.63  1.0000
  -1  -1  -2  189154    1083                                                      208725    7.69    1.58  1.0000
  -1   1   1   50840     372                                                       14160  -25.39   -8.89  1.0000
  -1   1   0  425248    2127                                                      452965   -0.57    4.57  1.0000
  -1   1  -1   54899     433                                                       18886  -26.38    6.18  1.0000
  -1   1  -2  185914    1604                                                      207742  -10.19    2.61  1.0000
  -1   1  -8   94505    1431                                                      146924  -11.44  -15.67  1.0000
  -1   1  -9   31691     918                                                       55662    5.40   21.98  1.0000
  -1   1 -10    6422     516                                                       15876   -6.83  -18.35  1.0000
  -1   1 -11    2686     416                                                        8386   10.15   16.76  1.0000
  -1   1 -12   18612     328                                                        4131   -2.74  -17.30  1.0000
  -1   1 -13    1055     333                                                        3754   10.95   12.05  1.0000
  -1   1 -14   20539     997                                                       38872    0.50  -13.63  1.0000
  -1   1 -15   15300     725                                                       16101    8.87    8.41  1.0000
  -1   1 -16   64389    1259                                                       47491    2.77   -9.15  1.0000
  -1   1 -17   22974    1076                                                       30482    5.66    5.99  1.0000
  -1   1 -18   38127    1349                                                       45978    3.86   -5.24  1.0000
  -1   1 -19   18875    1043                                                       24995    2.84    4.91  1.0000
  -1   1 -20    6679     500                                                        4026    3.83   -2.38  1.0000
  -1   1 -21    8256     582                                                        6272    1.03    5.00  1.0000
  -1   1 -22   25723    1035                                                       23263    3.23   -0.40  1.0000
  -1   1 -23    4333     594                                                        5564    0.11    5.57  1.0000
  -1   1 -24   60737    1686                                                       56763    2.61    1.16  1.0000
  -1   1 -25    8302     589                                                        4592   -0.23    5.68  1.0000
  -1   1 -26   20336    1157                                                       23088    2.02    2.57  1.0000
   1  -1 -26   17361     667                                                       22102   -3.44   -3.26  1.0000
   1  -1 -27     910     270                                                        2035   -0.70    5.52  1.0000
  -1   1 -27    1137     505                                                        2073   -0.19    4.86  1.0000
  -1   1 -27     917     258                                                        1730   -0.19    4.86  1.0000
   1  -1 -28     579     271                                                        1865   -2.89   -3.45  1.0000
  -1   1 -28     698     516                                                        1764    1.24    3.80  1.0000
  -1   1 -28     644     267                                                        1674    1.24    3.80  1.0000
  -1   1 -29    2727     585                                                        2715    0.11    3.35  1.0000
  -1   1 -29    2080     286                                                        2039    0.11    3.35  1.0000
   1  -1 -29    2507     298                                                        2322   -0.50    4.37  1.0000
  -1   1 -30    6267     636                                                        4017    0.30    4.50  1.0000
  -1   1 -30    5999     356                                                        3799    0.30    4.50  1.0000
   1  -1 -30    5639     358                                                        3854   -1.56   -3.66  1.0000
  -1   1 -31    1725     495                                                        1343    0.41    1.83  1.0000
   1  -1 -31    1785     295                                                        1510   -0.18    2.98  1.0000
  -1   1 -31    1547     271                                                        1184    0.41    1.83  1.0000
  -1   1 -32   16081    1253                                                       20957   -0.42    4.39  1.0000
   1  -1 -32   13912     700                                                       18489    0.08   -3.96  1.0000
  -1   1 -32   14785     733                                                       19470   -0.42    4.39  1.0000
  -1   1 -33   10276     564                                                       11127    0.44    0.81  1.0000
   1  -1 -33    9366     567                                                       10743    0.11    1.55  1.0000
  -1   1 -33   11213    1009                                                       12101    0.44    0.81  1.0000
  -1   1 -34    8032     420                                                        5351   -0.58    3.58  1.0000
   1  -1 -34    7899     421                                                        4874    1.33   -4.15  1.0000
   1  -1 -35    2637     384                                                        2817    0.25    0.42  1.0000
  -1   1 -35    2973     350                                                        3102    0.14    0.38  1.0000
   1  -1 -36    1173     301                                                         365    1.83   -4.03  1.0000
  -1   1 -36    1511     260                                                         775   -0.28    2.60  1.0000
  -1   1 -37    4838     417                                                        4782   -0.25    0.32  1.0000
   1  -1 -37    4598     441                                                        4566    0.20   -0.09  1.0000
   1  -1 -38    4308     521                                                        6968    1.67   -3.55  1.0000
  -1   1 -38    6005     467                                                        7116    0.12    1.92  1.0000
  -1   1 -39     402     243                                                         518   -0.44    0.41  1.0000
   1  -1 -39     431     309                                                         422    0.07    0.02  1.0000
   1  -1 -40    5907     430                                                        4121    1.13   -2.74  1.0000
  -1   1 -40    5278     377                                                        4258    0.33    1.63  1.0000
   1  -1 -41     970     304                                                         871   -0.05    0.37  1.0000
  -1   1 -41    1144     252                                                        1023   -0.35    0.48  1.0000
   1  -1 -42    3779     417                                                        4829    0.49   -1.74  1.0000
  -1   1 -42    3570     349                                                        4417    0.28    1.48  1.0000
   1  -1 -43     391     267                                                         458   -0.07    0.53  1.0000
   1  -1 -44     839     268                                                         974    0.02   -0.78  1.0000
   1  -1 -45    2647     306                                                        2709    0.00    0.34  1.0000
   1  -1 -46    2744     286                                                        2688   -0.16   -0.17  1.0000
   1  -1 -47     495     187                                                         470    0.15    0.00  1.0000
   1  -1 -48    1698     208                                                        1715   -0.10   -0.01  1.0000
  -1  -2 -45    1096     207                                                        1585   -1.16    0.93  1.0000
  -1  -2 -44    1657     218                                                        1656    0.11   -0.22  1.0000
  -1  -2 -43      77     186                                                        -140   -1.47    1.25  1.0000
   1   2 -43      76     281                                                        -433   -1.22    1.49  1.0000
  -1  -2 -42    2927     292                                                        2750    0.36    0.00  1.0000
   1   2 -42    3127     368                                                        2789   -0.55   -0.64  1.0000
  -1  -2 -41      21     208                                                          90   -1.70    1.42  1.0000
   1   2 -41      33     295                                                          93   -1.46    1.87  1.0000
  -1  -2 -40    1796     279                                                        1630    0.77    0.21  1.0000
   1   2 -40    1818     368                                                        1573   -0.60   -0.62  1.0000
   1   2 -39    1645     425                                                        2678   -1.69    1.79  1.0000
  -1  -2 -39    1808     330                                                        2751   -1.83    1.27  1.0000
   1   2 -38    1952     418                                                        2191   -0.48   -0.34  1.0000
  -1  -2 -38    2074     329                                                        2518    1.22    0.32  1.0000
   1   2 -37    7317     563                                                        6847   -1.99    1.24  1.0000
  -1  -2 -37    7305     443                                                        6626   -1.92    0.80  1.0000
   1   2 -36    8418     618                                                        8195   -0.25   -0.11  1.0000
  -1  -2 -36    9760     493                                                        8580    1.59    0.41  1.0000
  -1  -2 -35     718     286                                                        1316   -2.09    0.35  1.0000
   1   2 -35     486     379                                                        1085   -2.34    0.59  1.0000
  -1  -2 -34    8530     509                                                       10088    1.66    0.76  1.0000
   1   2 -34   10424     661                                                       10657   -0.13   -0.35  1.0000
  -1  -2 -33    2435     303                                                        2190   -2.37    0.40  1.0000
   1   2 -33    2111     391                                                        1903   -2.64    0.34  1.0000
  -1  -2 -32    5124     419                                                        6395    1.21    1.43  1.0000
   1   2 -32    5883     544                                                        6738   -0.19   -1.17  1.0000
  -1  -2 -31    2198     246                                                        1166   -2.63    1.05  1.0000
   1   2 -31    2409     367                                                        1370   -2.74    0.67  1.0000
  -1  -2 -30    5117     364                                                        5088    0.22    2.08  1.0000
   1   2 -30    6143     527                                                        5467   -0.23   -2.15  1.0000
  -1  -2 -29   14205     580                                                       16254   -2.49    1.89  1.0000
   1   2 -29   15178     792                                                       17494   -2.50    1.23  1.0000
   1   2 -28   12341     669                                                       11983    0.01   -2.65  1.0000
  -1  -2 -28   11134     477                                                       10798   -0.93    2.17  1.0000
  -1  -2 -27    5270     353                                                        5588   -1.71    2.29  1.0000
   1   2 -27    6502     503                                                        6344   -1.79    1.52  1.0000
   1   2 -27    5641     661                                                        5487   -1.79    1.52  1.0000
   1   2 -26    8964     804                                                        9709    0.40   -2.44  1.0000
  -1  -2 -26    8658     444                                                        9830   -1.57    1.54  1.0000
   1   2 -26    9939     614                                                       10729    0.40   -2.44  1.0000
   1   2 -25    8998     549                                                        8537   -0.57    1.34  1.0000
  -1  -2 -25    8496     386                                                        7600   -0.38    1.96  1.0000
   1   2 -25    8789     751                                                        8333   -0.57    1.34  1.0000
   1   2 -24   16677     919                                                       14892    0.57   -1.73  1.0000
   1   2 -23    9302     764                                                       10154    0.98    0.90  1.0000
   1   2 -22   16508     923                                                       16907    0.28   -0.64  1.0000
   1   2 -21   55284    1639                                                       60967    2.55    0.47  1.0000
   1   2 -20   24042    1029                                                       22937   -0.28    1.01  1.0000
   1   2 -19   11426     664                                                        8614    3.85    0.12  1.0000
   1   2 -18   28657    1160                                                       33175   -0.67    3.34  1.0000
   1   2 -17     621     286                                                         507    4.84   -0.14  1.0000
   1   2 -16    1898     377                                                        2386   -0.61    5.89  1.0000
   1   2 -15   59413    1415                                                       56645    5.82   -0.17  1.0000
   1   2 -14   10610     658                                                       11786   -0.07    7.66  1.0000
   1   2 -13   58296    1225                                                       46338    7.32    0.08  1.0000
   1   2 -12   55570     939                                                       51761    0.89    7.86  1.0000
   1   2 -12   56699    1263                                                       52864    0.89    7.86  1.0000
   1   2 -11  120281    2056                                                      152389    9.92    0.27  1.0000
   1   2 -11  119053    1483                                                      151005    9.92    0.27  1.0000
  -1   2  10   31036     674                                                       23675   -0.55    5.46  1.0000
   1   2 -10   35028     812                                                       24831    2.23    6.14  1.0000
   1   2 -10   36808     584                                                       26334    2.23    6.14  1.0000
   1   2  -9   48396     856                                                       78551   14.01   -0.18  1.0000
  -1   2   9   48208    1151                                                       79172  -13.80    1.70  1.0000
  -1   2   8   12086     479                                                       13807    0.32    1.63  1.0000
   1   2  -8   11724     611                                                       15039    3.73    2.41  1.0000
   1   2  -8   11472     365                                                       14751    3.73    2.41  1.0000
  -1   2   7   90600     873                                                       50467  -19.44    1.25  1.0000
   1   2  -7   92012    1073                                                       52329   19.56   -1.42  1.0000
  -1   2   6  137449    1359                                                      122661    1.53   -4.33  1.0000
   1   2  -6  138814    1598                                                      126047    4.86   -3.31  1.0000
   1   2  -5     776     607                                                       19982   25.83   -2.73  1.0000
   1   2  -5     568     338                                                       18654   25.83   -2.73  1.0000
   1   2  -4  107026    1353                                                      121550    4.88  -10.24  1.0000
   1   2  -4  106269     837                                                      120735    4.88  -10.24  1.0000
   1   2  -3  293851    1079                                                      203745   31.47   -3.06  1.0000
   1   2  -3  294764    1564                                                      204525   31.47   -3.06  1.0000
   1   2  -2   40680     688                                                       76358    3.49  -16.41  1.0000
   1   2  -2   40911     823                                                       76675    3.49  -16.41  1.0000
   1   2  -1  223256    1442                                                      373737   34.94   -2.04  1.0000
   1   2  -1  229559    1597                                                      381964   34.94   -2.04  1.0000
   1   2   0  115514    1280                                                      183059    1.18  -19.32  1.0000
  -1   2  -7   85454     978                                                       41244  -20.14    3.24  1.0000
  -1   2  -8   13222     638                                                       15994   -0.44    2.53  1.0000
  -1   2  -9   40921    1301                                                       66537  -13.78    3.40  1.0000
  -1   2 -10   58813    1079                                                       44764   -0.33    7.09  1.0000
  -1   2 -10   64429     988                                                       49684   -0.33    7.09  1.0000
  -1   2 -11  137901    1846                                                      168939   -9.36    1.80  1.0000
  -1   2 -12   46350     972                                                       43335   -0.60    8.98  1.0000
  -1   2 -13   62536    1093                                                       49575   -6.85   -0.43  1.0000
  -1   2 -14    8439     550                                                       10273   -0.52    8.44  1.0000
  -1   2 -15   58148    1339                                                       61899   -5.47   -2.02  1.0000
  -1   2 -16    1235     293                                                        1096    0.12    6.31  1.0000
  -1   2 -17    1681     365                                                        2047   -4.32   -2.55  1.0000
  -1   2 -18   33281    1252                                                       38226    0.77    3.69  1.0000
  -1   2 -19   17827     807                                                       13653   -2.91   -2.30  1.0000
  -1   2 -20   30641    1171                                                       28403    0.82    1.46  1.0000
  -1   2 -21   45018    1527                                                       46840   -1.22   -1.61  1.0000
  -1   2 -22    8484     749                                                        8689    0.23   -0.13  1.0000
  -1   2 -23   13541     895                                                       13009    0.37   -0.62  1.0000
  -1   2 -24   14653     887                                                       13318   -0.46   -1.25  1.0000
  -1   2 -25    6117     680                                                        6488    1.45    0.40  1.0000
   1  -2 -25    6970     378                                                        6837    1.05    0.97  1.0000
   1  -2 -26    6849     405                                                        7198    0.78    2.02  1.0000
  -1   2 -26    6834     755                                                        7541   -0.68   -2.01  1.0000
  -1   2 -27    2000     266                                                        1599    1.83    0.95  1.0000
   1  -2 -27    1706     241                                                        1491    2.19    2.11  1.0000
  -1   2 -27    1600     445                                                        1237    1.83    0.95  1.0000
   1  -2 -28    8112     462                                                        8465    0.41    2.78  1.0000
  -1   2 -28    9717     839                                                        9197   -0.28   -2.32  1.0000
  -1   2 -28    9395     526                                                        8882   -0.28   -2.32  1.0000
   1  -2 -29    8392     512                                                       10209    2.75    2.24  1.0000
  -1   2 -29    9637     583                                                       10982    1.73    0.69  1.0000
  -1   2 -29    9083     890                                                       10389    1.73    0.69  1.0000
   1  -2 -30    6148     438                                                        6421    0.05    2.92  1.0000
  -1   2 -30    8464     806                                                        7501    0.46   -2.16  1.0000
  -1   2 -30    7604     478                                                        6689    0.46   -2.16  1.0000
  -1   2 -31    1211     477                                                         784    1.59   -0.11  1.0000
   1  -2 -31    1412     273                                                         577    2.75    1.28  1.0000
  -1   2 -31     855     245                                                         503    1.59   -0.11  1.0000
   1  -2 -32    5314     457                                                        6986   -0.42    2.33  1.0000
  -1   2 -32    6146     904                                                        7757    1.13   -1.81  1.0000
  -1   2 -32    4933     482                                                        6386    1.13   -1.81  1.0000
  -1   2 -32    5391     788                                                        6906    1.13   -1.81  1.0000
   1  -2 -33    1903     346                                                        2099    2.34   -0.11  1.0000
  -1   2 -33    1680     340                                                        2044    1.70   -0.73  1.0000
  -1   2 -34    5039     482                                                        6405    1.43   -1.58  1.0000
   1  -2 -34    5610     463                                                        6480   -1.02    1.28  1.0000
  -1   2 -35     149     263                                                         418    1.99   -0.66  1.0000
   1  -2 -35     352     312                                                         692    1.79   -1.15  1.0000
   1  -2 -36    5312     443                                                        4649   -1.48    0.19  1.0000
  -1   2 -36    5518     428                                                        4340    1.30   -1.46  1.0000
  -1   2 -37    4128     378                                                        3122    2.15   -0.02  1.0000
   1  -2 -37    4544     423                                                        3463    1.39   -1.38  1.0000
  -1   2 -38     848     284                                                        1236    0.88   -1.23  1.0000
   1  -2 -38    1288     366                                                        1457   -1.52   -0.65  1.0000
  -1   2 -39    1258     306                                                        2030    2.06    0.67  1.0000
   1  -2 -39    1886     381                                                        2189    1.32   -0.90  1.0000
   1  -2 -40    1453     358                                                        1851   -1.18   -1.12  1.0000
   1  -2 -41     154     293                                                         378    1.58   -0.15  1.0000
   1  -2 -42    2038     326                                                        1769   -0.76   -1.23  1.0000
   1  -2 -43     393     250                                                         170    1.92    0.41  1.0000
   1  -2 -44    1004     256                                                        1031   -0.46   -1.08  1.0000
   1  -2 -45    1168     266                                                        1876    1.97    0.50  1.0000
   1  -2 -46     168     183                                                         287   -0.28   -0.85  1.0000
   1  -2 -47     698     167                                                         399    1.56    0.21  1.0000
   1  -2 -48     187     128                                                         111   -0.12   -0.68  1.0000
  -1  -3 -45     120     125                                                         156   -0.35   -0.09  1.0000
  -1  -3 -44    1453     209                                                        1680    0.35   -0.74  1.0000
  -1  -3 -43    1784     236                                                        1964   -0.47   -0.39  1.0000
  -1  -3 -42     811     198                                                         480    0.88   -1.15  1.0000
  -1  -3 -41    2191     263                                                        1815   -0.38   -0.85  1.0000
  -1  -3 -40    1040     269                                                        1420    1.39   -1.67  1.0000
  -1  -3 -39    5506     416                                                        6413   -0.23   -1.35  1.0000
  -1  -3 -38     477     241                                                         390    1.52   -2.19  1.0000
   1   3 -38      88     357                                                         -13   -1.26    1.63  1.0000
  -1  -3 -37     732     254                                                         365   -0.11   -1.82  1.0000
   1   3 -37      60     392                                                        -285   -0.68   -1.56  1.0000
   1   3 -36    5807     524                                                        4650   -0.99    2.06  1.0000
  -1  -3 -36    6414     412                                                        5320    1.21   -2.52  1.0000
  -1  -3 -35    4558     377                                                        3482    0.03   -2.25  1.0000
   1   3 -35    3946     469                                                        2881   -0.78   -1.87  1.0000
  -1  -3 -34    4774     441                                                        6125    0.77   -2.44  1.0000
   1   3 -34    4582     573                                                        5594   -0.78    2.42  1.0000
  -1  -3 -33    1909     312                                                        2023    0.28   -2.60  1.0000
   1   3 -33    1138     419                                                        1397   -0.39   -2.32  1.0000
   1   3 -32    2250     436                                                        1692   -0.75    2.62  1.0000
  -1  -3 -32    2525     312                                                        1829    0.53   -1.91  1.0000
   1   3 -31    4611     531                                                        4142    0.16   -2.88  1.0000
  -1  -3 -31    4860     369                                                        4176    0.48   -2.82  1.0000
  -1  -3 -30    4782     387                                                        4991    0.52   -1.22  1.0000
   1   3 -30    4382     576                                                        5475   -0.68    2.48  1.0000
   1   3 -29    9667     787                                                       12440    0.28   -3.40  1.0000
  -1  -3 -29    9139     540                                                       11425    0.23   -2.92  1.0000
  -1  -3 -28   13834     584                                                       14841    0.52   -0.83  1.0000
   1   3 -28   14286     852                                                       15642   -0.33    1.97  1.0000
   1   3 -27    1860     386                                                        1574   -0.34   -3.81  1.0000
  -1  -3 -27    1843     258                                                        1744   -0.69   -3.12  1.0000
   1   3 -27    1616     427                                                        1329   -0.34   -3.81  1.0000
   1   3 -26    4693     476                                                        4137    0.25    1.21  1.0000
  -1  -3 -26    4126     323                                                        3633    0.40   -0.92  1.0000
   1   3 -26    4195     544                                                        3670    0.25    1.21  1.0000
  -1  -3 -25   23691     603                                                       18090   -2.02   -3.78  1.0000
   1   3 -25   24344     999                                                       18478   -1.41   -4.35  1.0000
   1   3 -25   25381     898                                                       19383   -1.41   -4.35  1.0000
  -1  -3 -24     572     181                                                         646    0.22   -1.23  1.0000
   1   3 -24     490     292                                                         636    0.78    0.39  1.0000
   1   3 -24     487     343                                                         632    0.78    0.39  1.0000
   1   3 -23   32385    1235                                                       42420   -2.44   -5.36  1.0000
   1   3 -23   32443    1421                                                       42487   -2.44   -5.36  1.0000
   1   3 -22   11886     788                                                       12099    1.08   -0.40  1.0000
   1   3 -21    4584     615                                                        7138   -3.22   -6.89  1.0000
   1   3 -20   12872     778                                                       13972    1.25   -1.24  1.0000
   1   3 -19    9844     474                                                        4345   -3.80   -8.61  1.0000
   1   3 -18   30870    1015                                                       26841    1.34   -2.30  1.0000
   1   3 -17   46456    1552                                                       68614   -4.04  -10.04  1.0000
   1   3 -16   55349    1326                                                       63867    1.06   -3.70  1.0000
   1   3 -16   56409    1486                                                       65006    1.06   -3.70  1.0000
   1   3 -15   98289    1347                                                       75665   -3.53  -10.83  1.0000
   1   3 -15  100073    1551                                                       77242   -3.53  -10.83  1.0000
   1   3 -14     956     266                                                        2095   -0.01   -5.42  1.0000
   1   3 -14     925     312                                                        2041   -0.01   -5.42  1.0000
   1   3 -13    1644     257                                                        2540   -2.11  -10.88  1.0000
   1   3 -13    1683     332                                                        2658   -2.11  -10.88  1.0000
   1   3 -12   47565    1214                                                       52516   -1.89   -7.24  1.0000
  -1   3  12   49050    1225                                                       54338    2.17    6.47  1.0000
   1   3 -12   46154     930                                                       51017   -1.89   -7.24  1.0000
   1   3 -11   17624     892                                                       28606   -0.21  -10.12  1.0000
   1   3 -11   16351     650                                                       26948   -0.21  -10.12  1.0000
  -1   3  11   16723     846                                                       27453    0.89   -9.05  1.0000
  -1   3  10    6049     572                                                       13243    4.38    8.52  1.0000
   1   3 -10    6133     616                                                       14110   -3.97   -8.80  1.0000
   1   3 -10    5218     428                                                       12679   -3.97   -8.80  1.0000
  -1   3   9   26011     587                                                       14118    2.39   -9.14  1.0000
   1   3  -9   24141     429                                                       13455    1.61   -8.54  1.0000
  -1   3   8  169878    1704                                                      139779    5.79   10.24  1.0000
   1   3  -8  175073    1759                                                      142541   -5.41   -9.84  1.0000
   1   3  -8  169112    1316                                                      137151   -5.41   -9.84  1.0000
  -1   3   7   77652    1419                                                      100246    3.51   -8.55  1.0000
   1   3  -7   78531    1065                                                       96675    3.24   -6.26  1.0000
   1   3  -6   33002     880                                                       49337   -5.74  -10.33  1.0000
  -1   3   6   34427    1024                                                       50297    5.78   11.48  1.0000
   1   3  -6   32445     759                                                       48644   -5.74  -10.33  1.0000
   1   3  -5   46508     639                                                       35064    5.00   -3.75  1.0000
   1   3  -5   46374     669                                                       34948    5.00   -3.75  1.0000
  -1   3   5   50659     880                                                       36532    4.80   -6.80  1.0000
   1   3  -4  132300    1233                                                      132772   -5.03  -10.53  1.0000
   1   3  -4  131989    1178                                                      132457   -5.03  -10.53  1.0000
  -1   3   4  130638    1637                                                      134252    4.48   12.23  1.0000
   1   3  -3    8179     341                                                        9601    6.91   -1.55  1.0000
   1   3  -3    8671     300                                                       10164    6.91   -1.55  1.0000
  -1   3   3    6263     467                                                        9809    6.38   -4.17  1.0000
   1   3  -2   14894     317                                                        8178   -3.60  -10.68  1.0000
   1   3  -2   14802     231                                                        8105   -3.60  -10.68  1.0000
  -1   3   2   14604     433                                                        8738    2.52   12.55  1.0000
   1   3  -1  101695    1104                                                      101788    8.31    0.01  1.0000
  -1   3   1   98675    1404                                                      102490    7.60   -1.36  1.0000
   1   3  -1  101834     763                                                      101928    8.31    0.01  1.0000
  -1   3   0   49429    1255                                                       77772    0.36   12.49  1.0000
   1   3   0   50198     973                                                       75071   -1.60  -10.89  1.0000
  -1   3  -1   94588    1402                                                       98128    7.65    1.30  1.0000
   1   3   1   96872    1188                                                      100363    8.43    1.19  1.0000
   1   3   2   12006     351                                                        7169    0.87  -11.02  1.0000
  -1   3  -2    7854     276                                                        2643   -1.96   12.05  1.0000
  -1   3  -3    9429     554                                                       13568    6.55    3.84  1.0000
  -1   3  -4  141385    1746                                                      140222   -4.40   11.15  1.0000
  -1   3  -5   45306     873                                                       32072    5.07    6.13  1.0000
  -1   3  -6   25963    1023                                                       39734   -6.33    9.79  1.0000
  -1   3  -7   61134    1501                                                       80410    3.83    7.71  1.0000
  -1   3  -8  161291    1940                                                      136506   -6.80    8.09  1.0000
  -1   3  -9   25884     681                                                       14964    2.68    8.26  1.0000
  -1   3 -10   13857     835                                                       21652   -5.37    6.24  1.0000
  -1   3 -11   13976     782                                                       22916    1.14    8.11  1.0000
  -1   3 -11   13525     897                                                       22333    1.14    8.11  1.0000
  -1   3 -12   48278    1203                                                       55503   -2.64    4.37  1.0000
  -1   3 -12   43664    1378                                                       50533   -2.64    4.37  1.0000
  -1   3 -13    5922     485                                                        7604   -0.85    8.01  1.0000
  -1   3 -13    5827     608                                                        7486   -0.85    8.01  1.0000
  -1   3 -14    2335     308                                                        1524    0.14    2.60  1.0000
  -1   3 -14    2177     369                                                        1395    0.14    2.60  1.0000
  -1   3 -15   80838    1773                                                       64564   -2.80    8.31  1.0000
  -1   3 -15   80620    1432                                                       64368   -2.80    8.31  1.0000
  -1   3 -16   54455    1407                                                       58072    1.99    1.06  1.0000
  -1   3 -16   54858    1764                                                       58489    1.99    1.06  1.0000
  -1   3 -17   46630    1543                                                       65538   -4.18    8.67  1.0000
  -1   3 -17   45028    1885                                                       63631   -4.18    8.67  1.0000
  -1   3 -18   33591    1402                                                       32096    2.73    0.01  1.0000
  -1   3 -18   33338    1138                                                       31848    2.73    0.01  1.0000
  -1   3 -19   13127     671                                                        5235   -4.78    8.50  1.0000
  -1   3 -19   13851     577                                                        5701   -4.78    8.50  1.0000
  -1   3 -20   11435     882                                                       14125    2.65   -0.47  1.0000
  -1   3 -20   10059     993                                                       12591    2.65   -0.47  1.0000
  -1   3 -21    1668     558                                                        3717   -4.58    7.62  1.0000
  -1   3 -21    1584     637                                                        3549   -4.58    7.62  1.0000
  -1   3 -22    7685     706                                                        7024    2.05   -0.59  1.0000
  -1   3 -22    7894     844                                                        7225    2.05   -0.59  1.0000
  -1   3 -23   33927    1946                                                       46487   -3.61    6.35  1.0000
   1  -3 -23   32610     909                                                       43549   -2.81    5.77  1.0000
  -1   3 -23   35598    1695                                                       48442   -3.61    6.35  1.0000
   1  -3 -24    2985     290                                                        2932   -0.17   -0.42  1.0000
  -1   3 -24    2222     640                                                        2839    1.14   -0.82  1.0000
  -1   3 -24    1943     532                                                        2522    1.14   -0.82  1.0000
  -1   3 -25   33479    1524                                                       24959   -2.03    5.16  1.0000
  -1   3 -25   32581    1240                                                       24185   -2.03    5.16  1.0000
   1  -3 -25   32245     721                                                       24584   -1.47    4.92  1.0000
  -1   3 -26    3434     556                                                        2904    0.26   -1.49  1.0000
  -1   3 -26    4245     741                                                        3656    0.26   -1.49  1.0000
   1  -3 -26    3894     328                                                        3286    1.49    0.08  1.0000
  -1   3 -27    3152     595                                                        3652   -0.35    4.28  1.0000
  -1   3 -27    4135     803                                                        4760   -0.35    4.28  1.0000
   1  -3 -27    3520     358                                                        3785    0.13    4.15  1.0000
  -1   3 -27    3017     385                                                        3499   -0.35    4.28  1.0000
  -1   3 -28   15528    1130                                                       17376   -0.13   -2.43  1.0000
  -1   3 -28   17367    1417                                                       19322   -0.13   -2.43  1.0000
   1  -3 -28   13793     637                                                       17069    2.88    0.77  1.0000
  -1   3 -28   14378     738                                                       16155   -0.13   -2.43  1.0000
  -1   3 -29    7818     937                                                       10811    0.86    3.73  1.0000
  -1   3 -29    9007    1171                                                       12206    0.86    3.73  1.0000
   1  -3 -29    7338     534                                                       10247    1.46    3.26  1.0000
  -1   3 -29    7005     605                                                        9847    0.86    3.73  1.0000
   1  -3 -30    5162     410                                                        4543    3.45    1.40  1.0000
  -1   3 -30    3293     693                                                        4649    0.09   -3.19  1.0000
  -1   3 -30    3168     435                                                        4498    0.09   -3.19  1.0000
  -1   3 -30    3500     826                                                        4897    0.09   -3.19  1.0000
   1  -3 -31    1258     268                                                         454    1.94    2.44  1.0000
  -1   3 -31     492     279                                                          40    1.33    3.41  1.0000
  -1   3 -31    1087     423                                                         317    1.33    3.41  1.0000
  -1   3 -32    4731     390                                                        3074    0.51   -3.39  1.0000
   1  -3 -32    3975     416                                                        3979    3.15    1.83  1.0000
   1  -3 -33    6225     489                                                        6032    1.48    2.00  1.0000
  -1   3 -33    4648     461                                                        4992    1.28    3.18  1.0000
   1  -3 -34    3109     465                                                        4848    2.39    2.08  1.0000
  -1   3 -34    3381     415                                                        3868    0.51   -3.07  1.0000
   1  -3 -35    5217     430                                                        4271    0.46    1.93  1.0000
   1  -3 -36    7282     475                                                        5541    1.70    2.17  1.0000
   1  -3 -37     567     322                                                         220   -0.59    1.88  1.0000
   1  -3 -38     545     324                                                         273    1.31    1.99  1.0000
   1  -3 -39    4459     467                                                        5377   -1.24    1.61  1.0000
   1  -3 -40    1229     345                                                        1620    1.13    1.51  1.0000
   1  -3 -41    2392     330                                                        1754   -1.30    1.15  1.0000
   1  -3 -42     388     251                                                         186    0.96    0.93  1.0000
   1  -3 -43    1139     276                                                        1384   -0.87    0.66  1.0000
   1  -3 -44    1839     275                                                        2146    0.69    0.51  1.0000
   1  -3 -45     364     188                                                         431   -0.29    0.24  1.0000
   1  -3 -46     226     157                                                         283    0.34    0.38  1.0000
   1  -3 -47    2854     222                                                        2876    0.09   -0.08  1.0000
  -1  -4 -44      20     127                                                           8   -0.47    0.08  1.0000
  -1  -4 -43    2048     215                                                        1853   -0.44    0.24  1.0000
  -1  -4 -42     483     181                                                         433   -0.77   -0.24  1.0000
  -1  -4 -41     242     187                                                         154   -0.67   -0.43  1.0000
  -1  -4 -40    1093     246                                                        1307   -0.97   -0.57  1.0000
  -1  -4 -39    3493     339                                                        4142   -0.81   -0.94  1.0000
  -1  -4 -38    4346     341                                                        3742   -0.87   -0.75  1.0000
  -1  -4 -37    2441     311                                                        2172   -0.90   -0.88  1.0000
  -1  -4 -36     461     268                                                         527   -0.35   -0.82  1.0000
  -1  -4 -35    3971     402                                                        4483   -0.92   -0.32  1.0000
  -1  -4 -34    2918     366                                                        3188    0.53   -0.90  1.0000
  -1  -4 -33     711     276                                                         524   -0.76    0.41  1.0000
  -1  -4 -32    1198     286                                                        1108    1.66   -0.96  1.0000
  -1  -4 -31    2902     380                                                        3344   -0.36    1.02  1.0000
  -1  -4 -30    3694     413                                                        4951    2.93   -0.74  1.0000
  -1  -4 -29    4875     406                                                        4557    0.14    1.47  1.0000
   1   4 -29    4486     602                                                        4420   -0.23    1.16  1.0000
   1   4 -28     190     399                                                         940   -5.01   -0.74  1.0000
  -1  -4 -28     228     272                                                        1103    4.23   -0.09  1.0000
  -1  -4 -27   23137     762                                                       23995    0.42    1.75  1.0000
   1   4 -27   21069    1125                                                       21854    0.42    1.63  1.0000
   1   4 -26    5573     557                                                        5004   -6.53   -1.40  1.0000
   1   4 -26    5522     590                                                        4951   -6.53   -1.40  1.0000
  -1  -4 -26    6926     385                                                        5229    5.37    0.84  1.0000
   1   4 -25   10827     759                                                       10244    1.04    1.81  1.0000
   1   4 -25   10826     720                                                       10243    1.04    1.81  1.0000
   1   4 -24    1587     521                                                        4224   -7.51   -1.91  1.0000
   1   4 -24    1371     495                                                        3815   -7.51   -1.91  1.0000
   1   4 -23    3998     465                                                        2952    1.34    1.46  1.0000
   1   4 -23    4081     443                                                        3023    1.34    1.46  1.0000
   1   4 -22    2015     543                                                        6300   -7.73   -2.19  1.0000
   1   4 -22    1918     587                                                        6124   -7.73   -2.19  1.0000
   1   4 -21   29758    1155                                                       31503    1.20    0.71  1.0000
   1   4 -20    7739     695                                                       10642   -7.33   -2.38  1.0000
   1   4 -19   33347    1130                                                       31980    0.84   -0.11  1.0000
   1   4 -18    4354     338                                                        1658   -6.81   -2.39  1.0000
   1   4 -17     368     257                                                         565    0.65   -0.89  1.0000
   1   4 -16   20227     817                                                       19433   -6.57   -1.80  1.0000
   1   4 -15   11268     642                                                       12312    1.02   -1.80  1.0000
   1   4 -14    9554     568                                                        9608   -6.72   -0.30  1.0000
   1   4 -13   52088    1188                                                       45480    2.03   -2.93  1.0000
  -1   4  13   55809    1347                                                       48789   -1.28    4.78  1.0000
   1   4 -12   17946     756                                                       18580   -7.01    1.64  1.0000
  -1   4  12   18148     856                                                       20051   -7.70    0.60  1.0000
   1   4 -11    3572     423                                                        5567    3.46   -4.04  1.0000
  -1   4  11    4709     487                                                        5828   -1.88    5.95  1.0000
   1   4 -11    3561     355                                                        5553    3.46   -4.04  1.0000
  -1   4  10   15021     807                                                       21229   -7.56    1.32  1.0000
   1   4 -10   13824     764                                                       21765   -7.13    2.95  1.0000
   1   4 -10   13962     661                                                       21940   -7.13    2.95  1.0000
  -1   4   9   14982     786                                                       20276   -3.07    6.20  1.0000
   1   4  -9   12966     693                                                       19742    4.93   -4.67  1.0000
   1   4  -9   12856     609                                                       19605    4.93   -4.67  1.0000
   1   4  -8   37497     897                                                       43198   -6.93    2.81  1.0000
  -1   4   8   41226    1091                                                       43186   -6.90    0.76  1.0000
   1   4  -7     780     290                                                        3928    6.15   -4.54  1.0000
   1   4  -7     671     283                                                        3680    6.15   -4.54  1.0000
  -1   4   7     846     384                                                        3859   -5.16    5.50  1.0000
  -1   4   6  103137    1603                                                       97827   -6.10   -0.65  1.0000
   1   4  -6  104839    1207                                                       94140   -6.25    1.32  1.0000
   1   4  -6  107599    1307                                                       96764   -6.25    1.32  1.0000
   1   4  -5   32852     803                                                       46760    7.10   -3.72  1.0000
   1   4  -5   32958     903                                                       46886    7.10   -3.72  1.0000
   1   4  -4    2245     313                                                        4833   -4.88   -0.71  1.0000
   1   4  -4    2515     266                                                        5226   -4.88   -0.71  1.0000
  -1   4   4    2046     408                                                        4859   -5.10   -2.07  1.0000
   1   4  -3   44698     731                                                       30591    7.81   -2.52  1.0000
   1   4  -3   44347     557                                                       30300    7.81   -2.52  1.0000
   1   4  -2   28331     537                                                       29100   -2.61   -2.45  1.0000
   1   4  -2   27681     714                                                       28438   -2.61   -2.45  1.0000
  -1   4   2   29053     914                                                       30480   -3.43   -2.97  1.0000
  -1   4   1     858     251                                                        1171  -11.30    0.71  1.0000
   1   4  -1     234     199                                                        1279    8.29   -1.14  1.0000
  -1   4   0    1529     214                                                         566   -0.84   -3.37  1.0000
   1   4   0    1130     161                                                         464    0.44   -3.44  1.0000
  -1   4  -1    1022     344                                                        3330  -11.05   -0.73  1.0000
   1   4   1     847     289                                                        3445    8.44    0.37  1.0000
  -1   4  -2   22405     802                                                       22601    2.29   -3.28  1.0000
   1   4   2   21542     725                                                       23302    3.71   -3.49  1.0000
  -1   4  -3   45812     910                                                       28987   -9.47   -2.07  1.0000
   1   4   3   43211     837                                                       28814    8.22    1.98  1.0000
  -1   4  -4    2968     467                                                        6486    5.18   -2.47  1.0000
  -1   4  -5   59562    1497                                                       77815   -7.10   -3.47  1.0000
  -1   4  -6   95838    1684                                                       92635    7.30   -0.87  1.0000
  -1   4  -7     101     308                                                        1419   -4.67   -4.80  1.0000
  -1   4  -8   33425    1150                                                       39262    8.60    0.91  1.0000
  -1   4  -9   11579     766                                                       15710   -2.79   -5.65  1.0000
  -1   4 -10   16641    1016                                                       27087    9.24    1.89  1.0000
  -1   4 -11    4814     474                                                        5798   -1.67   -5.65  1.0000
  -1   4 -11    4494     525                                                        5422   -1.67   -5.65  1.0000
  -1   4 -12   16590     793                                                       18891    9.29    1.51  1.0000
  -1   4 -12   15881     921                                                       18094    9.29    1.51  1.0000
  -1   4 -13   64960    1322                                                       57857   -1.04   -4.79  1.0000
  -1   4 -13   69581    1706                                                       62232   -1.04   -4.79  1.0000
  -1   4 -14    7150     761                                                        9218    8.82    0.11  1.0000
  -1   4 -14    6885     587                                                        8886    8.82    0.11  1.0000
  -1   4 -15   14128     945                                                       14945   -0.57   -3.35  1.0000
  -1   4 -15   14397     778                                                       15224   -0.57   -3.35  1.0000
  -1   4 -16   23943     900                                                       19745    8.09   -1.47  1.0000
  -1   4 -16   21700    1027                                                       17654    8.09   -1.47  1.0000
  -1   4 -17    2192     526                                                        2944   -0.26   -1.66  1.0000
  -1   4 -17    2905     491                                                        3763   -0.26   -1.66  1.0000
  -1   4 -18    2064     479                                                        1702    7.44   -2.63  1.0000
  -1   4 -18    2052     413                                                        1685    7.44   -2.63  1.0000
  -1   4 -19   28285    1420                                                       27810   -0.31    0.06  1.0000
  -1   4 -19   30780    1213                                                       30285   -0.31    0.06  1.0000
  -1   4 -20    8153     836                                                       10558    7.02   -3.21  1.0000
   1   4  20    7894     463                                                        9707    6.12   -2.41  1.0000
  -1   4 -20    6680     863                                                        8762    7.02   -3.21  1.0000
  -1   4 -21   27677    1487                                                       28505   -0.72    1.54  1.0000
   1   4  21   30949     783                                                       30137   -0.47   -0.34  1.0000
   1   4  22    4686     452                                                        8728    6.28   -2.16  1.0000
  -1   4 -22    3150     849                                                        7704    6.68   -3.19  1.0000
  -1   4 -22    4360     848                                                        9563    6.68   -3.19  1.0000
  -1   4 -23    1762     471                                                        1023   -1.13    2.46  1.0000
   1  -4 -23    2026     245                                                        1366   -0.61    2.58  1.0000
  -1   4 -23    2146     466                                                        1326   -1.13    2.46  1.0000
   1   4  23    1860     267                                                        1607   -0.07   -1.19  1.0000
  -1   4 -24     439     489                                                        1500    6.14   -2.57  1.0000
   1  -4 -24    1239     270                                                        1726   -5.75    1.78  1.0000
  -1   4 -24     438     513                                                        1496    6.14   -2.57  1.0000
  -1   4 -25   13430    1007                                                       12914   -1.12    2.63  1.0000
   1  -4 -25   13026     574                                                       12857   -0.69    2.32  1.0000
  -1   4 -26    5699     663                                                        4428    5.24   -1.44  1.0000
  -1   4 -26    4794     692                                                        3589    5.24   -1.44  1.0000
   1  -4 -26    5249     396                                                        4678   -5.03    1.10  1.0000
   1  -4 -27   18911     730                                                       19659   -0.46    1.46  1.0000
  -1   4 -27   17113    1330                                                       18173   -0.66    2.26  1.0000
  -1   4 -27   16126    1120                                                       17153   -0.66    2.26  1.0000
  -1   4 -28     305     467                                                        1047    4.01   -0.19  1.0000
   1  -4 -28     349     320                                                        1353   -4.31    0.29  1.0000
   1  -4 -29    1039     314                                                         945   -0.22    0.45  1.0000
  -1   4 -29     967     461                                                         822   -0.12    1.77  1.0000
   1  -4 -30    1737     392                                                        2929   -3.61   -0.35  1.0000
   1  -4 -31    1549     350                                                        1484   -0.13   -0.31  1.0000
   1  -4 -32    1591     347                                                        1180   -2.68   -0.60  1.0000
   1  -4 -33     862     349                                                         934   -0.05   -0.65  1.0000
   1  -4 -34    3929     449                                                        4032   -1.43   -0.48  1.0000
   1  -4 -35    2933     423                                                        2995    0.20   -0.69  1.0000
   1  -4 -36     612     355                                                         570   -0.17   -0.22  1.0000
   1  -4 -37    1460     352                                                        1303    0.56   -0.52  1.0000
   1  -4 -38    3986     413                                                        3903    0.64    0.00  1.0000
   1  -4 -39    3194     396                                                        3602    0.74   -0.22  1.0000
   1  -4 -40    1118     301                                                         972    0.84    0.11  1.0000
   1  -4 -41     198     246                                                         199    0.65    0.15  1.0000
   1  -4 -42     458     240                                                         533    0.67    0.11  1.0000
   1  -4 -43    2296     265                                                        2078    0.43    0.45  1.0000
   1  -4 -44     171     172                                                         141    0.44    0.03  1.0000
   1  -4 -45    1910     214                                                        2040    0.28    0.55  1.0000
  -1  -5 -43    1008     148                                                         918   -0.31    0.28  1.0000
  -1  -5 -42     200     145                                                         280   -0.62   -0.53  1.0000
  -1  -5 -41    2571     249                                                        2871   -0.65    0.52  1.0000
  -1  -5 -40     505     178                                                         260   -1.12   -0.89  1.0000
  -1  -5 -39    1133     223                                                        1090   -0.68    0.69  1.0000
  -1  -5 -38    1051     243                                                        1110   -1.36   -1.41  1.0000
  -1  -5 -37     274     232                                                         231   -0.38    0.73  1.0000
  -1  -5 -36    4962     412                                                        5888   -1.14   -1.84  1.0000
  -1  -5 -35    1625     309                                                        1866    0.01    0.64  1.0000
  -1  -5 -34    2947     352                                                        3078   -0.53   -2.03  1.0000
  -1  -5 -33    4088     391                                                        3810    0.34    0.46  1.0000
  -1  -5 -32     319     282                                                         420    0.26   -2.03  1.0000
  -1  -5 -31     768     298                                                         955    0.71    0.27  1.0000
  -1  -5 -30    1830     315                                                        1092    1.05   -2.00  1.0000
  -1  -5 -29      33     268                                                        -121    1.26    0.11  1.0000
  -1  -5 -28    9122     555                                                       10091    1.74   -1.97  1.0000
  -1  -5 -27    1202     301                                                        1681    1.80    0.06  1.0000
  -1   5  27    2266     302                                                        2049    0.42    1.34  1.0000
  -1   5  26    8425     444                                                        7316    1.60   -1.20  1.0000
  -1   5  25    7424     485                                                        8710   -0.30    1.60  1.0000
  -1   5  24    1222     284                                                        1441    1.81   -0.73  1.0000
  -1   5  23   11445     512                                                       10100   -1.17    1.73  1.0000
  -1   5  22    9496     513                                                       10941    1.58    0.17  1.0000
  -1   5  21    4450     372                                                        5071   -1.81    2.05  1.0000
  -1   5  20    2991     298                                                        2824    0.84    1.32  1.0000
  -1   5  19   13866     587                                                       17648   -1.96    2.68  1.0000
  -1   5  18    2252     264                                                        2261   -0.39    2.38  1.0000
  -1   5  17   57616     922                                                       49675   -1.76    3.36  1.0000
  -1   5  16    4316     302                                                        3426   -1.92    3.29  1.0000
  -1   5  12   28624    1042                                                       23737   -4.02    5.59  1.0000
  -1   5  11   13546     715                                                       10838   -1.52    2.38  1.0000
  -1   5  10    9348     781                                                       15523   -3.75    6.52  1.0000
  -1   5   9   77619    1681                                                       80952   -1.06    0.94  1.0000
  -1   5   8    5811     686                                                       11734   -2.68    6.55  1.0000
  -1   5   7   41887    1199                                                       42800   -0.12   -0.66  1.0000
  -1   5   6     271     269                                                         449   -1.32    5.65  1.0000
   1   5  -6     205     176                                                         336    0.99   -6.29  1.0000
   1   5  -5    3567     322                                                        3434    0.63   -0.71  1.0000
  -1   5   5    4204     409                                                        3489    0.97   -1.87  1.0000
  -1   5   4    5954     414                                                        3542   -0.18    4.45  1.0000
   1   5  -4    6430     323                                                        3414   -0.23   -6.32  1.0000
   1   5  -3     404     191                                                         399    2.06   -1.17  1.0000
  -1   5   3     735     267                                                         487    1.83   -2.13  1.0000
  -1   5   2   29152    1022                                                       30307    0.42    3.72  1.0000
   1   5  -2   27264     857                                                       29247   -0.73   -6.08  1.0000
   1   5  -1   26276     811                                                       25993    2.87   -0.95  1.0000
  -1   5   1   27101     984                                                       27679    2.27   -1.23  1.0000
   1   5   0     216     204                                                         278   -0.54   -5.72  1.0000
  -1   5   0    1200     270                                                         345    0.46    3.79  1.0000
  -1   5  -1   29555    1012                                                       28880    2.27    0.36  1.0000
   1   5   1   33130     952                                                       30912    2.90   -0.30  1.0000
   1   5   2   37721    1066                                                       37020   -0.14   -5.40  1.0000
  -1   5  -2   34425    1086                                                       33558    0.23    4.52  1.0000
  -1   5  -3    1517     309                                                        1316    1.78    1.71  1.0000
  -1   5  -4    2665     336                                                        1780    0.22    5.52  1.0000
  -1   5  -5    4706     438                                                        3815    0.78    2.04  1.0000
  -1   5  -6     510     275                                                         225    0.78    6.35  1.0000
  -1   5  -7   31796    1152                                                       33011   -0.51    1.21  1.0000
  -1   5  -8    5552     730                                                       11160    1.81    6.64  1.0000
  -1   5  -9   72089    1765                                                       74462   -1.61   -0.28  1.0000
  -1   5 -10   15120     862                                                       21810    2.77    6.18  1.0000
  -1   5 -10   14696     996                                                       21296    2.77    6.18  1.0000
  -1   5 -11   15113     699                                                       12713   -2.21   -1.74  1.0000
  -1   5 -11   13993     787                                                       11685   -2.21   -1.74  1.0000
  -1   5 -12   26976     891                                                       21659    3.08    5.12  1.0000
  -1   5 -12   27326    1081                                                       21975    3.08    5.12  1.0000
  -1   5 -13    3595     386                                                        2714   -2.38   -2.74  1.0000
  -1   5 -13    3404     477                                                        2542   -2.38   -2.74  1.0000
  -1   5 -14    8780     855                                                       11274    2.58    3.81  1.0000
  -1   5 -14    8894     693                                                       11404    2.58    3.81  1.0000
  -1   5 -15   30731    1245                                                       36736   -2.42   -3.15  1.0000
  -1   5 -15   28234    1471                                                       33999   -2.42   -3.15  1.0000
   1   5  15   27665     846                                                       33274   -0.02   -3.58  1.0000
   1   5  16    6355     391                                                        5342   -1.27   -2.50  1.0000
  -1   5 -16    6107     691                                                        5651    1.57    2.47  1.0000
  -1   5 -16    7227     613                                                        6746    1.57    2.47  1.0000
  -1   5 -17   57008    1508                                                       49116   -2.44   -3.08  1.0000
  -1   5 -17   52956    1758                                                       45359   -2.44   -3.08  1.0000
   1   5  17   54065    1042                                                       47811    0.13   -3.32  1.0000
   1   5  18    3520     349                                                        3335   -0.03   -1.31  1.0000
  -1   5 -18    3530     508                                                        3210    0.41    1.09  1.0000
  -1   5 -18    3322     600                                                        3012    0.41    1.09  1.0000
  -1   5 -19   12006    1137                                                       15725   -2.21   -2.69  1.0000
  -1   5 -19   13752    1005                                                       17715   -2.21   -2.69  1.0000
   1   5  19   14310     646                                                       16631    0.32   -2.58  1.0000
  -1   5 -20    5185     642                                                        4703   -0.69   -0.33  1.0000
  -1   5 -20    5077     703                                                        4600   -0.69   -0.33  1.0000
   1   5  20    4914     393                                                        4478    1.04   -0.18  1.0000
   1   5  21    5049     436                                                        6288    0.82   -1.62  1.0000
  -1   5 -21    5271     711                                                        6137   -1.52   -2.21  1.0000
  -1   5 -21    4978     786                                                        5817   -1.52   -2.21  1.0000
  -1   5 -22    7731     859                                                        9433   -1.61   -1.56  1.0000
  -1   5 -22    6943     937                                                        8560   -1.61   -1.56  1.0000
   1   5  22    8100     522                                                        9796    1.84    0.76  1.0000
  -1   5 -23   15527    1031                                                       13690   -0.52   -1.83  1.0000
   1   5  23   15599     623                                                       14518    1.52   -0.77  1.0000
  -1   5 -23   13660    1086                                                       11939   -0.52   -1.83  1.0000
  -1   5 -24     871     525                                                        1810   -2.18   -2.31  1.0000
   1  -5 -24    1578     321                                                        1835    1.81    0.73  1.0000
   1   5  24    1746     347                                                        2358    2.24    1.42  1.0000
  -1   5 -25    6488     805                                                        7534    0.29   -1.64  1.0000
   1  -5 -25    6845     533                                                        8082   -0.30   -1.60  1.0000
  -1   5 -26    8732     761                                                        6914   -2.31   -2.52  1.0000
   1  -5 -26    9298     541                                                        8133    1.60    1.20  1.0000
   1  -5 -27    1028     324                                                         872    0.42   -1.34  1.0000
   1  -5 -28    9214     591                                                        9430    1.14    1.51  1.0000
   1  -5 -29     472     320                                                         283    0.80   -0.82  1.0000
   1  -5 -30    1784     366                                                        1279    0.66    1.95  1.0000
   1  -5 -31    1957     405                                                        2263    0.87   -0.27  1.0000
   1  -5 -32     629     360                                                         927    0.32    2.38  1.0000
   1  -5 -33    3397     445                                                        3368    0.75   -0.01  1.0000
   1  -5 -34    4390     476                                                        4672    0.12    2.41  1.0000
   1  -5 -35    2394     409                                                        2422    0.50   -0.10  1.0000
   1  -5 -36    5777     495                                                        6278   -0.03    1.91  1.0000
   1  -5 -37     137     288                                                         173    0.21   -0.29  1.0000
   1  -5 -38    1378     320                                                        1577   -0.15    1.23  1.0000
   1  -5 -39    1897     300                                                        1791    0.02   -0.29  1.0000
   1  -5 -40     586     240                                                         465   -0.19    0.81  1.0000
   1  -5 -41    1994     268                                                        2036    0.03   -0.11  1.0000
   1  -5 -42     188     183                                                         256   -0.11    0.72  1.0000
   1  -5 -43     951     185                                                         983    0.18    0.09  1.0000
   1  -5 -44      10     122                                                         -16    0.01    0.70  1.0000
   1   5  44     169     149                                                         174   -0.23    0.39  1.0000
  -1  -6 -41     744     145                                                         814    0.43    0.22  1.0000
  -1  -6 -40     914     166                                                         863    0.25    0.16  1.0000
  -1  -6 -39     397     157                                                         347    0.26    0.28  1.0000
  -1  -6 -38    1001     196                                                         904    0.38   -0.23  1.0000
  -1  -6 -37    3848     305                                                        3826    0.01    0.16  1.0000
  -1  -6 -36    1032     256                                                        1278    0.44   -0.82  1.0000
  -1  -6 -35    1514     274                                                        1574   -0.14   -0.14  1.0000
  -1  -6 -34    1705     295                                                        1737    0.38   -1.29  1.0000
  -1  -6 -33    1064     289                                                        1198   -0.13   -0.47  1.0000
  -1  -6 -32    1035     287                                                         720    0.18   -1.50  1.0000
  -1  -6 -31    4203     391                                                        3822   -0.09   -0.70  1.0000
  -1  -6 -30     661     313                                                        1035   -0.08   -1.61  1.0000
  -1  -6 -29    2281     358                                                        2229   -0.16   -0.78  1.0000
  -1  -6 -28    2605     347                                                        2202   -0.31   -1.65  1.0000
  -1   6  28    3340     325                                                        2658   -0.96    1.00  1.0000
  -1  -6 -27     324     282                                                         382   -0.40   -0.69  1.0000
  -1   6  27     811     268                                                         708    0.19   -0.65  1.0000
  -1   6  26    2396     334                                                        2602   -0.83    0.69  1.0000
  -1   6  25    2043     323                                                        2107    1.07   -0.88  1.0000
  -1   6  24    2347     339                                                        2341   -0.46    0.00  1.0000
  -1   6  23    5015     390                                                        3991    1.64   -1.10  1.0000
  -1   6  22    5574     419                                                        5257   -0.13   -0.87  1.0000
  -1   6  21    6873     468                                                        7283    1.67   -1.38  1.0000
  -1   6  20    7919     494                                                        8797   -0.09   -1.60  1.0000
  -1   6  19    1118     300                                                        1717    1.45   -1.85  1.0000
  -1   6  18    1423     254                                                         830   -0.44   -1.91  1.0000
  -1   6  17    2615     295                                                        1837    1.44   -2.58  1.0000
  -1   6  16    8220     469                                                        9350   -0.98   -1.78  1.0000
  -1   6  15    1138     299                                                        2324    1.80   -3.43  1.0000
  -1   6  14    5904     400                                                        5981   -1.32   -1.27  1.0000
  -1   6  13   21827     636                                                       19509    2.36   -4.00  1.0000
  -1   6  12    3238     299                                                        2668   -1.13   -0.44  1.0000
  -1   6  11    8947     716                                                        7711    3.06   -3.90  1.0000
  -1   6  11    8879     417                                                        7646    3.06   -3.90  1.0000
  -1   6  10    4767     566                                                        4481   -0.36    0.61  1.0000
  -1   6  10    4216     326                                                        3947   -0.36    0.61  1.0000
  -1   6   9   14547     985                                                       19798    3.94   -3.13  1.0000
  -1   6   9   15030     635                                                       20363    3.94   -3.13  1.0000
  -1   6   8    4135     363                                                        5143    0.69    1.72  1.0000
  -1   6   8    3805     520                                                        4774    0.69    1.72  1.0000
  -1   6   7    7242     445                                                        9556    4.97   -2.03  1.0000
  -1   6   7    6709     663                                                        8926    4.97   -2.03  1.0000
  -1   6   6   11875     706                                                       10419    1.51    2.62  1.0000
  -1   6   6   12453     483                                                       10964    1.51    2.62  1.0000
  -1   6   5    7001     335                                                        4878    5.84   -1.08  1.0000
  -1   6   5    6835     507                                                        4733    5.84   -1.08  1.0000
  -1   6   4    5920     548                                                        5900    1.70    3.12  1.0000
  -1   6   4    6434     379                                                        6424    1.70    3.12  1.0000
  -1   6   3   11880     846                                                       16871    6.22   -0.63  1.0000
  -1   6   2    6067     636                                                        8433    1.12    3.19  1.0000
   1   6  -2    6674     593                                                        8911    1.85    2.46  1.0000
   1   6  -1   23948     893                                                       20992   -5.39    0.34  1.0000
  -1   6   1   23603     906                                                       18860    6.10   -0.68  1.0000
   1   6   0    3774     412                                                        2874    1.31    2.26  1.0000
  -1   6   0    3735     410                                                        2330    0.02    2.94  1.0000
  -1   6  -1   26149    1016                                                       23406    5.74   -0.96  1.0000
  -1   6  -2    6112     628                                                        7528   -1.09    2.50  1.0000
  -1   6  -3    7647     756                                                       11892    5.33   -1.00  1.0000
  -1   6  -4   11554     754                                                       11458   -1.70    1.90  1.0000
  -1   6  -5    3913     416                                                        2049    4.85   -0.38  1.0000
  -1   6  -6   15564     874                                                       14910   -1.55    1.16  1.0000
   1   6   6   16088     568                                                       14922    0.25    1.01  1.0000
  -1   6  -7    6653     706                                                        8862    4.23    0.83  1.0000
   1   6   7    6794     465                                                        9299   -4.70   -1.74  1.0000
  -1   6  -8    4571     401                                                        4909   -0.78    0.35  1.0000
   1   6   8    4953     376                                                        5200    0.79    0.60  1.0000
  -1   6  -8    4537     562                                                        4874   -0.78    0.35  1.0000
  -1   6  -9   17100     744                                                       21230    3.47    2.09  1.0000
   1   6   9   17201     701                                                       22142   -3.45   -2.97  1.0000
  -1   6  -9   17459    1092                                                       21631    3.47    2.09  1.0000
  -1   6  -9   18605     937                                                       22908    3.47    2.09  1.0000
  -1   6 -10    1782     434                                                        1933    0.18   -0.38  1.0000
  -1   6 -10    2185     332                                                        2351    0.18   -0.38  1.0000
  -1   6 -10    2523     403                                                        2702    0.18   -0.38  1.0000
   1   6  10    2322     324                                                        2623    1.36    0.23  1.0000
  -1   6 -11    6772     450                                                        5545    2.71    2.77  1.0000
  -1   6 -11    7470     650                                                        6191    2.71    2.77  1.0000
  -1   6 -11    7379     526                                                        6106    2.71    2.77  1.0000
   1   6  11    6835     427                                                        6089   -2.14   -3.61  1.0000
  -1   6 -12    2475     372                                                        2120    0.90   -0.96  1.0000
  -1   6 -12    2642     484                                                        2275    0.90   -0.96  1.0000
  -1   6 -12    2240     330                                                        1902    0.90   -0.96  1.0000
   1   6  12    2751     317                                                        2081    1.69   -0.15  1.0000
  -1   6 -13   12688     628                                                       11697    2.08    2.67  1.0000
  -1   6 -13   15035     987                                                       13973    2.08    2.67  1.0000
  -1   6 -13   14318     764                                                       13277    2.08    2.67  1.0000
   1   6  13   15483     612                                                       13696   -1.21   -3.37  1.0000
  -1   6 -14    8246     635                                                        7740    1.16   -1.44  1.0000
   1   6  14    6791     486                                                        7318    1.68   -0.64  1.0000
  -1   6 -14    6894     500                                                        6427    1.16   -1.44  1.0000
  -1   6 -14    7689     763                                                        7199    1.16   -1.44  1.0000
  -1   6 -15     521     308                                                         960    1.65    2.13  1.0000
   1   6  15     821     312                                                        1254   -0.84   -2.47  1.0000
  -1   6 -15    1051     395                                                        1680    1.65    2.13  1.0000
  -1   6 -15     837     488                                                        1397    1.65    2.13  1.0000
  -1   6 -16    6358     827                                                        7671    0.97   -1.82  1.0000
   1   6  16    7273     515                                                        8124    1.37   -1.19  1.0000
  -1   6 -16    6805     667                                                        8162    0.97   -1.82  1.0000
  -1   6 -17    2083     497                                                        1400    1.47    1.67  1.0000
  -1   6 -17    2094     402                                                        1409    1.47    1.67  1.0000
   1   6  17    1765     325                                                        1316   -0.92   -1.41  1.0000
  -1   6 -18     690     428                                                         387    0.54   -2.00  1.0000
   1   6  18     695     290                                                         355    0.84   -1.49  1.0000
  -1   6 -18     927     360                                                         577    0.54   -2.00  1.0000
   1   6  19    2607     394                                                        3194   -1.14   -0.58  1.0000
  -1   6 -19    2490     565                                                        3361    1.54    1.42  1.0000
  -1   6 -20    5528     687                                                        5881    0.06   -1.79  1.0000
   1   6  20    5216     468                                                        5796    0.25   -1.20  1.0000
   1   6  21    3446     392                                                        3083   -1.21   -0.08  1.0000
  -1   6 -21    2986     579                                                        3159    1.63    1.21  1.0000
  -1   6 -22    2071     507                                                        2201   -0.26   -1.19  1.0000
   1   6  22    2991     400                                                        3008   -0.21   -0.32  1.0000
   1   6  23    1642     361                                                        1691   -1.05    0.24  1.0000
  -1   6 -23    1734     444                                                        1250    1.43    0.84  1.0000
   1  -6 -24    2436     359                                                        2430   -0.46    0.00  1.0000
   1   6  24    2580     402                                                        2981   -0.44    0.72  1.0000
   1   6  25    1055     354                                                        1314   -0.74    0.49  1.0000
   1  -6 -25     815     315                                                         841    1.07    0.88  1.0000
   1  -6 -26    3564     437                                                        3818   -0.83   -0.69  1.0000
   1  -6 -27     696     325                                                         600    0.19    0.65  1.0000
   1  -6 -28    5033     457                                                        4187   -0.96   -1.00  1.0000
   1  -6 -29    3659     442                                                        3508   -0.45    0.39  1.0000
   1  -6 -30    1294     388                                                        1730   -0.77   -0.99  1.0000
   1  -6 -31    2882     422                                                        3058   -0.58    0.13  1.0000
   1  -6 -32    1821     365                                                        1524   -0.41   -0.87  1.0000
   1  -6 -33    1630     366                                                        1744   -0.46   -0.07  1.0000
   1  -6 -34    2190     370                                                        2257   -0.10   -0.72  1.0000
   1  -6 -35     851     309                                                         741   -0.46   -0.13  1.0000
   1  -6 -36    1867     325                                                        1952    0.02   -0.53  1.0000
   1  -6 -37    4868     380                                                        5237   -0.59   -0.04  1.0000
   1  -6 -38    1709     260                                                        1630    0.00   -0.28  1.0000
   1  -6 -39     627     203                                                         505   -0.55    0.12  1.0000
   1  -6 -40    1084     207                                                        1107   -0.04   -0.07  1.0000
   1   6  41    1446     210                                                        1544    0.43   -0.22  1.0000
   1  -6 -41    1283     191                                                        1348   -0.26    0.22  1.0000
  -1  -7 -38     800     140                                                         733   -0.23    0.16  1.0000
  -1  -7 -37     479     152                                                         399   -0.41   -0.17  1.0000
  -1  -7 -36      64     162                                                         122   -0.39    0.58  1.0000
  -1  -7 -35     637     199                                                         739   -0.72   -0.14  1.0000
  -1  -7 -34    1493     242                                                        1507   -0.46    1.02  1.0000
  -1  -7 -33    1686     262                                                        1635   -0.63    0.09  1.0000
  -1  -7 -32     826     246                                                         692   -0.40    1.35  1.0000
  -1  -7 -31    1472     296                                                        1633   -0.22    0.42  1.0000
  -1  -7 -30    2417     352                                                        3074   -0.24    1.50  1.0000
  -1  -7 -29     941     296                                                         870    0.21    0.71  1.0000
  -1  -7 -28      45     282                                                         -11   -0.03    1.48  1.0000
  -1   7  28     453     229                                                         321   -0.40    0.75  1.0000
  -1  -7 -27    1076     301                                                         986    0.56    0.89  1.0000
  -1   7  27    1542     275                                                        1388    0.00    0.79  1.0000
  -1   7  26    4302     356                                                        3617   -0.14    1.21  1.0000
  -1   7  25    2376     347                                                        2860    0.27    1.12  1.0000
  -1   7  24    6047     468                                                        7071    0.18    1.39  1.0000
  -1   7  23    1704     320                                                        1400    0.76    1.34  1.0000
  -1   7  22     329     283                                                         289    0.43    0.89  1.0000
  -1   7  21    1508     351                                                        2174    1.39    1.39  1.0000
  -1   7  20    5019     433                                                        4830    0.57   -0.19  1.0000
  -1   7  19    8510     492                                                        7626    1.95    1.22  1.0000
  -1   7  18    7797     468                                                        6837    0.66   -1.34  1.0000
  -1   7  17    8488     502                                                        8714    2.23    0.82  1.0000
  -1   7  16    9277     551                                                       11155    0.72   -2.11  1.0000
  -1   7  15    4398     423                                                        5266    2.08    0.32  1.0000
  -1   7  14    4244     365                                                        3224    0.66   -2.37  1.0000
  -1   7  13    4561     385                                                        3738    1.41   -0.02  1.0000
  -1   7  12    1508     312                                                        1203    0.34   -2.26  1.0000
  -1   7  11    6000     437                                                        6200    0.28   -0.04  1.0000
  -1   7  10   10597     553                                                       11974   -0.24   -1.92  1.0000
  -1   7   9    6020     453                                                        6774   -1.12    0.17  1.0000
  -1   7   9    6607     727                                                        7396   -1.12    0.17  1.0000
  -1   7   8    2040     459                                                        1563   -0.86   -1.50  1.0000
  -1   7   8    1929     307                                                        1465   -0.86   -1.50  1.0000
  -1   7   7    8513     482                                                        8543   -2.49    0.34  1.0000
  -1   7   7    9326     759                                                        9363   -2.49    0.34  1.0000
  -1   7   6   18564     996                                                       18688   -1.21   -1.17  1.0000
  -1   7   6   19912     685                                                       20043   -1.21   -1.17  1.0000
  -1   7   5    8909     452                                                        6915   -3.54    0.30  1.0000
  -1   7   5    8959     646                                                        6959   -3.54    0.30  1.0000
  -1   7   4    3488     500                                                        3295   -1.03   -1.15  1.0000
   1   7  -4    3328     357                                                        2920    1.10    1.89  1.0000
  -1   7   4    3728     365                                                        3530   -1.03   -1.15  1.0000
  -1   7   3    1186     464                                                        2553   -4.12    0.12  1.0000
  -1   7   3    1539     344                                                        3073   -4.12    0.12  1.0000
   1   7  -3    1796     331                                                        2461   -2.18    0.39  1.0000
  -1   7   2    8937     462                                                        7688   -0.27   -1.48  1.0000
   1   7  -2    8659     474                                                        7000    0.72    2.02  1.0000
  -1   7   2    8094     639                                                        6907   -0.27   -1.48  1.0000
  -1   7   1     963     383                                                        1145   -4.27   -0.04  1.0000
  -1   7   1    1249     305                                                        1515   -4.27   -0.04  1.0000
   1   7  -1    1400     296                                                        1330   -2.14    0.25  1.0000
  -1   7   0   16823     997                                                       19384    0.83   -1.97  1.0000
   1   7   0   16983     723                                                       19430    0.11    2.01  1.0000
  -1   7   0   17391     706                                                       19993    0.83   -1.97  1.0000
  -1   7  -1    2965     360                                                        3464   -4.10   -0.10  1.0000
   1   7   1    2997     360                                                        3036   -1.93   -0.02  1.0000
  -1   7  -1    3352     515                                                        3904   -4.10   -0.10  1.0000
  -1   7  -2   10745     693                                                        8139    1.81   -2.35  1.0000
   1   7   2   10328     501                                                        8671   -0.40    1.83  1.0000
  -1   7  -2   11363     496                                                        8678    1.81   -2.35  1.0000
  -1   7  -3    1604     490                                                        2971   -3.69   -0.11  1.0000
   1   7   3    2431     347                                                        2964   -1.63   -0.21  1.0000
  -1   7  -3    1373     338                                                        2648   -3.69   -0.11  1.0000
  -1   7  -4    6317     621                                                        5660    2.16   -2.52  1.0000
   1   7   4    6729     433                                                        5860   -0.54    1.64  1.0000
  -1   7  -4    6433     435                                                        5772    2.16   -2.52  1.0000
  -1   7  -5    8230     473                                                        6482   -3.05   -0.14  1.0000
  -1   7  -5    7929     648                                                        6213   -3.05   -0.14  1.0000
   1   7   5    7281     458                                                        6508   -1.25   -0.19  1.0000
  -1   7  -6   15635    1023                                                       17624    1.70   -2.56  1.0000
   1   7   6   16098     678                                                       17541   -0.25    1.68  1.0000
  -1   7  -6   15836     709                                                       17839    1.70   -2.56  1.0000
  -1   7  -7    9889     570                                                        9993   -2.20   -0.21  1.0000
  -1   7  -7    9735     810                                                        9838   -2.20   -0.21  1.0000
   1   7   7    9853     546                                                        9915   -0.79   -0.02  1.0000
  -1   7  -8    3163     346                                                        1983    0.75   -2.59  1.0000
  -1   7  -8    2379     433                                                        1372    0.75   -2.59  1.0000
   1   7   8    3090     348                                                        2124    0.28    2.07  1.0000
  -1   7  -9    3691     435                                                        4387   -1.23   -0.31  1.0000
  -1   7  -9    3850     618                                                        4560   -1.23   -0.31  1.0000
   1   7   9    4874     436                                                        4962   -0.30    0.11  1.0000
  -1   7 -10   13817     705                                                       15244   -0.09   -2.63  1.0000
  -1   7 -10   15349    1076                                                       16857   -0.09   -2.63  1.0000
   1   7  10   16007     719                                                       17533    0.69    2.66  1.0000
  -1   7 -11    4815     456                                                        4575   -0.32   -0.46  1.0000
  -1   7 -11    4953     639                                                        4710   -0.32   -0.46  1.0000
   1   7  11    5317     469                                                        5452    0.20    0.06  1.0000
  -1   7 -12    1085     329                                                        1032   -0.40   -2.62  1.0000
  -1   7 -12     942     420                                                         882   -0.40   -2.62  1.0000
   1   7  12     905     326                                                         902    0.67    3.06  1.0000
   1   7  13    5718     474                                                        5246    0.74   -0.14  1.0000
  -1   7 -13    4990     462                                                        4704    0.43   -0.66  1.0000
  -1   7 -14    3359     381                                                        2214   -0.28   -2.49  1.0000
   1   7  14    3355     388                                                        2251    0.20    2.93  1.0000
  -1   7 -15    5196     506                                                        6080    1.02   -0.91  1.0000
   1   7  15    6675     546                                                        7481    1.34   -0.42  1.0000
   1   7  16    6913     568                                                        8152   -0.40    2.23  1.0000
   1   7  17    8302     575                                                        8337    1.89   -0.71  1.0000
   1   7  18    7457     533                                                        6493   -0.71    1.20  1.0000
   1   7  19    8832     561                                                        7990    2.13   -0.93  1.0000
   1   7  20    3676     456                                                        4016   -0.58    0.20  1.0000
   1   7  21    2025     422                                                        2861    1.93   -1.05  1.0000
   1   7  22     793     351                                                         649   -0.21   -0.55  1.0000
   1   7  23    1275     370                                                        1171    1.43   -1.05  1.0000
   1  -7 -24    9847     614                                                       11143    0.18   -1.39  1.0000
   1   7  24   11113     625                                                       12124    0.08   -1.03  1.0000
   1  -7 -25    3334     441                                                        3903    0.27   -1.12  1.0000
   1  -7 -26    3800     414                                                        3158   -0.14   -1.21  1.0000
   1  -7 -27    1245     350                                                        1106    0.00   -0.79  1.0000
   1  -7 -28     638     322                                                         480   -0.40   -0.75  1.0000
   1  -7 -29    1411     346                                                        1384   -0.15   -0.47  1.0000
   1  -7 -30    2309     376                                                        2602   -0.52   -0.43  1.0000
   1  -7 -31    1312     318                                                        1418   -0.30   -0.28  1.0000
   1  -7 -32    2466     336                                                        2513   -0.51   -0.33  1.0000
   1  -7 -33    2068     307                                                        1951   -0.51   -0.24  1.0000
   1  -7 -34    2709     314                                                        2621   -0.44   -0.27  1.0000
   1  -7 -35     796     238                                                         979   -0.64   -0.25  1.0000
   1   7  35    1089     257                                                        1224   -0.72    0.14  1.0000
   1  -7 -36      64     177                                                          65   -0.36   -0.11  1.0000
   1   7  36     251     190                                                         357   -0.39   -0.58  1.0000
   1   7  37     193     160                                                         143   -0.41    0.17  1.0000
   1  -7 -37     317     165                                                         267   -0.56   -0.21  1.0000
   1  -7 -38     370     149                                                         329   -0.26    0.01  1.0000
  -1  -8 -35      68     118                                                         101    0.88   -0.16  1.0000
  -1  -8 -34     566     156                                                         637   -0.27    0.51  1.0000
  -1  -8 -33     766     175                                                         720    1.16   -0.35  1.0000
  -1  -8 -32     316     179                                                         333   -0.45    0.39  1.0000
  -1  -8 -31     676     210                                                         813    1.34   -0.52  1.0000
  -1  -8 -30    1539     247                                                        1307   -0.76    0.18  1.0000
  -1  -8 -29    1126     264                                                        1416    1.37   -0.61  1.0000
  -1  -8 -28    2912     342                                                        3497   -1.15    0.05  1.0000
  -1  -8 -27     123     247                                                         297    1.30   -0.65  1.0000
  -1   8  26     521     223                                                         386    0.94    0.07  1.0000
  -1  -8 -26     223     268                                                          79   -1.47   -0.02  1.0000
  -1   8  25     602     230                                                         392   -0.89    0.70  1.0000
  -1   8  24      86     237                                                          80    1.02    0.45  1.0000
  -1   8  23      48     254                                                          45   -0.80    0.90  1.0000
  -1   8  22      53     271                                                         171    1.08    0.81  1.0000
  -1   8  21     307     282                                                         215   -0.36    0.89  1.0000
  -1   8  20    3455     376                                                        2679    1.12    1.11  1.0000
  -1   8  19     533     310                                                         412    0.34    0.67  1.0000
  -1   8  18    2192     396                                                        3030    1.22    1.36  1.0000
  -1   8  17    3039     403                                                        3292    0.96    0.32  1.0000
  -1   8  16    1131     358                                                        1705    1.48    1.55  1.0000
  -1   8  15    2821     384                                                        2860    1.23   -0.09  1.0000
  -1   8  14     895     320                                                         725    1.76    1.63  1.0000
  -1   8  13     596     329                                                         884    1.09   -0.59  1.0000
  -1   8  12     610     333                                                        1115    1.82    1.51  1.0000
  -1   8  11    4777     424                                                        4051    0.62   -1.18  1.0000
  -1   8  10    8380     499                                                        6859    1.57    1.12  1.0000
  -1   8   9    3218     433                                                        4189   -0.01   -1.76  1.0000
  -1   8   8    5727     490                                                        6568    1.19    0.53  1.0000
  -1   8   7    7167     476                                                        6042   -0.66   -2.17  1.0000
  -1   8   6    5955     484                                                        6585    0.97   -0.03  1.0000
  -1   8   5    2040     401                                                        3194   -1.19   -2.20  1.0000
   1   8  -4   15474     700                                                       14075    1.21   -0.37  1.0000
  -1   8   4   16609     661                                                       15558    0.94   -0.39  1.0000
  -1   8   3    9211     562                                                        9705   -1.49   -1.71  1.0000
   1   8  -3    9164     581                                                        9008    0.77    0.28  1.0000
  -1   8   2    3725     436                                                        4266    0.91   -0.49  1.0000
   1   8  -2    4060     456                                                        4620    1.01   -0.08  1.0000
  -1   8   1    1223     353                                                        1318   -1.54   -0.72  1.0000
   1   8  -1    1791     361                                                        1786    0.88   -0.09  1.0000
   1   8   0     387     311                                                         539    0.83    0.30  1.0000
  -1   8   0     127     313                                                         144    0.64   -0.47  1.0000
   1   8   1    1646     353                                                        1438    0.91   -0.47  1.0000
  -1   8  -1     799     338                                                         893   -1.40    0.47  1.0000
   1   8   2    7221     518                                                        6837    0.48    0.56  1.0000
  -1   8  -2    7017     531                                                        7093    0.10   -0.47  1.0000
   1   8   3    9617     593                                                        9787    0.87   -0.76  1.0000
  -1   8  -3    9729     613                                                       10195   -1.13    1.43  1.0000
   1   8   4   16510     733                                                       16325   -0.13    0.63  1.0000
  -1   8  -4   17275     740                                                       16459   -0.56   -0.51  1.0000
   1   8   5    2733     435                                                        3278    0.66   -0.88  1.0000
  -1   8  -5    2038     429                                                        2897   -0.77    1.76  1.0000
   1   8   6    5138     507                                                        5844   -0.89    0.59  1.0000
  -1   8  -6    4381     493                                                        5143   -1.18   -0.44  1.0000
  -1   8  -7    4621     462                                                        3940   -0.31    1.49  1.0000
   1   8   7    5050     475                                                        4600    0.17   -0.76  1.0000
  -1   8  -8    5786     558                                                        6971   -1.63   -0.18  1.0000
   1   8   8    6846     560                                                        8034   -1.53    0.55  1.0000
  -1   8  -9    3778     472                                                        4334    0.17    0.97  1.0000
   1   8   9    5047     499                                                        5188   -0.55   -0.42  1.0000
  -1   8 -10    7095     521                                                        5725   -1.88    0.20  1.0000
   1   8  10    7984     529                                                        6512   -1.85    0.56  1.0000
  -1   8 -11    5172     497                                                        4748    0.59    0.64  1.0000
   1   8  11    5122     493                                                        5121   -1.26   -0.06  1.0000
   1   8  12     121     351                                                         364   -1.87    0.65  1.0000
  -1   8 -12     228     323                                                         367   -1.93    0.56  1.0000
  -1   8 -13     716     343                                                         975    0.89    0.59  1.0000
   1   8  13     611     372                                                        1025   -1.61    0.09  1.0000
   1   8  14    2727     410                                                        2173   -1.71    0.84  1.0000
  -1   8 -14    2182     381                                                        2025   -1.86    0.86  1.0000
   1   8  15    2810     431                                                        2561   -1.42   -0.01  1.0000
   1   8  16     759     378                                                        1228   -1.54    1.01  1.0000
   1   8  17    3964     463                                                        4100   -0.81   -0.14  1.0000
   1   8  18    1716     403                                                        2442   -1.43    1.03  1.0000
   1   8  19     946     363                                                         967   -0.05   -0.08  1.0000
   1   8  20    3589     419                                                        2747   -1.43    0.82  1.0000
   1   8  21     347     335                                                         400    0.57    0.18  1.0000
   1   8  22     542     345                                                         928   -1.53    0.46  1.0000
   1  -8 -23     516     289                                                         581   -0.80   -0.90  1.0000
   1  -8 -24     180     286                                                         184    1.02   -0.45  1.0000
   1  -8 -25     413     275                                                         242   -0.89   -0.70  1.0000
   1  -8 -26     261     268                                                         166    0.94   -0.07  1.0000
   1  -8 -27     246     265                                                         374   -0.79   -0.44  1.0000
   1  -8 -28    3392     364                                                        3908    0.90    0.32  1.0000
   1  -8 -29     913     267                                                        1038   -0.76   -0.24  1.0000
   1  -8 -30    2987     291                                                        2473    0.86    0.66  1.0000
   1  -8 -31     625     214                                                         616   -0.85   -0.16  1.0000
   1  -8 -32     339     196                                                         468    0.71    0.90  1.0000
   1  -8 -33     858     198                                                         908   -0.90   -0.12  1.0000
   1  -8 -34     507     162                                                         624    0.43    0.93  1.0000
   1  -8 -35     253     126                                                         252   -0.74   -0.05  1.0000
  -1  -9 -30    1120     169                                                        1231   -0.38    0.42  1.0000
  -1  -9 -29     133     149                                                         161   -0.08    0.28  1.0000
  -1  -9 -28     461     177                                                         496   -0.41    0.36  1.0000
  -1  -9 -27    1180     215                                                        1137    0.05    0.42  1.0000
  -1  -9 -26    1346     235                                                        1358   -0.48    0.14  1.0000
  -1  -9 -25     738     222                                                         656    0.09    0.44  1.0000
  -1   9  24    1924     248                                                        2166   -0.67    0.31  1.0000
  -1  -9 -24    2002     276                                                        2039   -0.59   -0.14  1.0000
  -1   9  23     809     220                                                         835   -0.10    0.01  1.0000
  -1   9  22    1174     252                                                        1122   -0.64   -0.05  1.0000
  -1   9  21     554     245                                                         513   -0.11   -0.17  1.0000
  -1   9  20      90     248                                                         143   -0.50   -0.28  1.0000
  -1   9  19     520     276                                                         546   -0.04   -0.35  1.0000
  -1   9  18    2200     340                                                        2118   -0.38   -0.31  1.0000
  -1   9  17     446     290                                                         441    0.03   -0.42  1.0000
  -1   9  16    2771     373                                                        2825   -0.32   -0.25  1.0000
  -1   9  15    1161     338                                                        1237    0.05   -0.37  1.0000
  -1   9  14    2387     373                                                        2304   -0.22   -0.24  1.0000
  -1   9  13    3823     419                                                        3846    0.04   -0.36  1.0000
  -1   9  12     433     328                                                         481    0.04   -0.30  1.0000
  -1   9  11    4011     424                                                        3910    0.13   -0.51  1.0000
  -1   9  10    2733     400                                                        2980    0.48   -0.38  1.0000
  -1   9   9     340     328                                                         262    0.35   -0.74  1.0000
  -1   9   8    4628     438                                                        4399    0.99   -0.40  1.0000
  -1   9   7    1475     352                                                        1269    0.63   -0.81  1.0000
  -1   9   6    2050     396                                                        2256    1.41   -0.41  1.0000
  -1   9   5     139     340                                                         251    0.77   -0.56  1.0000
  -1   9   4    1128     363                                                         896    1.61   -0.46  1.0000
  -1   9   3    3998     452                                                        3791    0.66   -0.12  1.0000
   1   9  -3    4170     505                                                        4283   -0.22    0.01  1.0000
  -1   9   2    4013     441                                                        3132    1.50   -0.65  1.0000
   1   9  -2    3542     474                                                        3387    0.82    1.13  1.0000
   1   9  -1    1682     408                                                        1482   -0.48    0.38  1.0000
  -1   9   1    1263     390                                                        1392    0.37    0.27  1.0000
   1   9   0   12177     742                                                       13269    1.00    1.28  1.0000
  -1   9   0   11189     656                                                       11946    1.10   -0.98  1.0000
   1   9   1    2235     429                                                        2071   -0.59    0.60  1.0000
  -1   9  -1    2170     421                                                        2228    0.14    0.46  1.0000
   1   9   2    1742     388                                                        1156    1.00    1.45  1.0000
  -1   9  -2    1529     389                                                        1194    0.53   -1.39  1.0000
   1   9   3    2296     443                                                        2595   -0.49    0.50  1.0000
  -1   9  -3    2391     426                                                        2509    0.10    0.46  1.0000
  -1   9  -4    1478     369                                                         972    0.04   -1.73  1.0000
   1   9   4    1170     369                                                         680    0.95    1.56  1.0000
   1   9   5     805     371                                                         800   -0.20    0.14  1.0000
  -1   9  -5     514     354                                                         568    0.15    0.39  1.0000
  -1   9  -6    2276     444                                                        2995   -0.15   -1.83  1.0000
   1   9   6    2609     461                                                        3356    0.89    1.49  1.0000
   1   9   7     775     371                                                         760    0.15   -0.22  1.0000
  -1   9  -7     750     364                                                         719    0.12    0.32  1.0000
   1   9   8    6491     517                                                        5679    0.70    1.15  1.0000
  -1   9  -8    6278     508                                                        5270   -0.03   -1.64  1.0000
   1   9   9       6     343                                                          -7    0.41   -0.37  1.0000
  -1   9  -9     278     332                                                         266   -0.03    0.28  1.0000
  -1   9 -10    1838     418                                                        2353    0.17   -1.24  1.0000
   1   9  10    2201     422                                                        2498    0.31    0.62  1.0000
   1   9  11    2586     425                                                        2831    0.45   -0.28  1.0000
  -1   9 -11    2950     418                                                        2802   -0.16    0.31  1.0000
  -1   9 -12     157     311                                                         204    0.25   -0.78  1.0000
   1   9  12     109     339                                                         103   -0.17    0.11  1.0000
   1   9  13    3214     439                                                        3115    0.21   -0.11  1.0000
  -1   9 -13    3178     410                                                        3306   -0.15    0.43  1.0000
   1   9  14    2652     404                                                        2772   -0.53   -0.16  1.0000
   1   9  15    1033     351                                                         997   -0.19    0.02  1.0000
   1   9  16    3534     417                                                        3366   -0.69   -0.11  1.0000
   1   9  17    1159     334                                                        1010   -0.50    0.06  1.0000
   1   9  18    2593     368                                                        2617   -0.73    0.11  1.0000
   1   9  19     921     318                                                        1066   -0.54    0.01  1.0000
   1   9  20     907     301                                                        1113   -0.72    0.31  1.0000
   1  -9 -21       1     245                                                        -108   -0.11    0.17  1.0000
   1  -9 -22    1090     261                                                        1039   -0.64    0.05  1.0000
   1  -9 -23     359     226                                                         377   -0.10   -0.01  1.0000
   1  -9 -24    1757     279                                                        1989   -0.67   -0.31  1.0000
   1  -9 -25     797     226                                                         765    0.02   -0.15  1.0000
   1  -9 -26    2027     247                                                        1875   -0.56   -0.59  1.0000
   1  -9 -27    1477     224                                                        1551    0.23   -0.26  1.0000
   1  -9 -28     478     175                                                         565   -0.36   -0.61  1.0000
   1  -9 -29     191     150                                                         268    0.45   -0.35  1.0000
   1  -9 -30    1181     168                                                        1299   -0.17   -0.40  1.0000
  -1 -10 -24     110     128                                                          79   -0.35   -0.03  1.0000
  -1 -10 -23     418     160                                                         484    0.00   -0.35  1.0000
  -1 -10 -22    1418     208                                                        1520   -0.33    0.11  1.0000
  -1  10  21     611     169                                                         625   -0.02    0.35  1.0000
  -1 -10 -21     243     170                                                         238    0.10   -0.30  1.0000
  -1  10  20     672     185                                                         695   -0.12   -0.17  1.0000
  -1  10  19      35     175                                                          21    0.17    0.43  1.0000
  -1  10  18     607     207                                                         614   -0.04   -0.20  1.0000
  -1  10  17     280     215                                                         331    0.27    0.31  1.0000
  -1  10  16       0     219                                                         -28   -0.06   -0.11  1.0000
  -1  10  15     214     237                                                         200    0.24    0.04  1.0000
  -1  10  14    2319     316                                                        2347   -0.13    0.14  1.0000
  -1  10  13     585     276                                                         607    0.08   -0.19  1.0000
  -1  10  12    2033     329                                                        2033   -0.14    0.50  1.0000
  -1  10  11     973     304                                                         897   -0.25   -0.19  1.0000
  -1  10  10     316     295                                                         444   -0.03    0.89  1.0000
  -1  10   9     191     288                                                         190   -0.71    0.04  1.0000
  -1  10   8     728     312                                                         559    0.09    1.23  1.0000
  -1  10   7    1065     340                                                        1255   -1.16    0.37  1.0000
  -1  10   6    1488     363                                                        1804    0.10    1.40  1.0000
  -1  10   5      51     311                                                         196   -1.42    0.65  1.0000
  -1  10   4    5426     462                                                        5422    0.02    1.29  1.0000
  -1  10   3    3009     408                                                        3486   -1.36    0.74  1.0000
  -1  10   2     432     325                                                         424   -0.04    0.90  1.0000
   1  10  -1    1813     390                                                        1699    0.32   -0.08  1.0000
  -1  10   1    1823     361                                                        1517   -1.02    0.57  1.0000
   1  10   0      14     347                                                        -278   -0.64   -0.50  1.0000
  -1  10   0     172     322                                                         200    0.04    0.40  1.0000
   1  10   1    2749     435                                                        2799   -0.09    0.07  1.0000
  -1  10  -1    2883     403                                                        2631   -0.51    0.15  1.0000
   1  10   2    1189     377                                                        1357   -0.48   -0.26  1.0000
  -1  10  -2    1038     353                                                        1000    0.20    0.01  1.0000
  -1  10  -3    3724     439                                                        3624   -0.01   -0.41  1.0000
   1  10   3    4398     474                                                        4137   -0.38    0.22  1.0000
  -1  10  -4    6306     512                                                        6482    0.31   -0.15  1.0000
   1  10   4    6922     542                                                        6871   -0.07    0.06  1.0000
   1  10   5     173     337                                                         251   -0.42    0.43  1.0000
  -1  10  -5     140     324                                                         253    0.31   -0.84  1.0000
   1  10   6    1700     359                                                        1629    0.37    0.39  1.0000
  -1  10  -6    1391     346                                                        1304    0.28   -0.17  1.0000
   1  10   7    1839     380                                                        2095   -0.17    0.62  1.0000
  -1  10  -7    1487     355                                                        1805    0.36   -0.92  1.0000
  -1  10  -8     211     281                                                         233    0.15   -0.18  1.0000
   1  10   8     490     307                                                         365    0.54    0.65  1.0000
   1  10   9     658     311                                                         618    0.26    0.65  1.0000
  -1  10  -9     575     288                                                         456    0.22   -0.63  1.0000
   1  10  10    1073     321                                                        1331    0.42    0.74  1.0000
  -1  10 -10    1436     293                                                        1365    0.00   -0.23  1.0000
   1  10  11    1721     324                                                        1513    0.65    0.54  1.0000
   1  10  12    2436     342                                                        2418    0.17    0.58  1.0000
   1  10  13     424     278                                                         480    0.82    0.41  1.0000
   1  10  14    2443     316                                                        2404   -0.02    0.21  1.0000
   1  10  15     900     273                                                         975    0.74    0.35  1.0000
   1  10  16     414     239                                                         451   -0.11   -0.17  1.0000
   1 -10 -17     175     178                                                         215    0.27   -0.31  1.0000
   1 -10 -18     781     199                                                         789   -0.04    0.20  1.0000
   1 -10 -19     179     170                                                         148    0.17   -0.43  1.0000
   1 -10 -20    1181     203                                                        1211   -0.12    0.17  1.0000
   1 -10 -21     355     159                                                         365   -0.02   -0.35  1.0000
   1 -10 -22    1248     179                                                        1178   -0.21    0.07  1.0000
   1 -10 -23     486     139                                                         545   -0.24   -0.17  1.0000
  -1  11  15     449     148                                                         523    0.34   -0.22  1.0000
  -1  11  14     613     162                                                         593    0.13   -0.03  1.0000
  -1  11  13     260     156                                                         240    0.13   -0.34  1.0000
  -1  11  12     714     185                                                         693    0.28   -0.15  1.0000
  -1  11  11     154     174                                                         113   -0.17   -0.39  1.0000
  -1  11  10     432     203                                                         514    0.29   -0.31  1.0000
  -1  11   9    1036     236                                                        1093   -0.45   -0.31  1.0000
  -1  11   8     852     229                                                         751    0.14   -0.46  1.0000
  -1  11   7     764     241                                                         804   -0.58   -0.19  1.0000
  -1  11   6     315     234                                                         393   -0.06   -0.53  1.0000
  -1  11   5     252     236                                                         217   -0.51   -0.11  1.0000
  -1  11   4     659     244                                                         549   -0.20   -0.47  1.0000
  -1  11   3       1     234                                                         -67   -0.23   -0.06  1.0000
  -1  11   2     697     259                                                         711   -0.18   -0.28  1.0000
  -1  11   1    1349     283                                                        1347    0.16    0.02  1.0000
  -1  11   0    2178     314                                                        2183    0.02   -0.01  1.0000
  -1  11  -1    1370     285                                                        1313    0.46    0.11  1.0000
  -1  11  -2     374     247                                                         452    0.38    0.27  1.0000
  -1  11  -3      12     215                                                          17    0.49    0.15  1.0000
   1  11   4     149     202                                                         247    0.01   -0.80  1.0000
  -1  11  -4     177     214                                                         203    0.75    0.45  1.0000
  -1  11  -5     233     204                                                         271    0.26    0.09  1.0000
  -2   0   0    6292     369                                                       10454  -28.06    0.63  1.0000
  -2   0  -1    1344     263                                                        4301   -1.40  -12.41  1.0000
  -2   0   1    1024     222                                                        3898   -1.13  -12.24  1.0000
  -2   0   2   13774     736                                                       56345  -26.77    1.08  1.0000
  -2   0   3    3237     199                                                        4000   -1.32   -8.20  1.0000
  -2   0   4   85319     516                                                       32759  -24.44    0.70  1.0000
  -2   0   5   19131     357                                                       15898   -2.00   -2.36  1.0000
  -2   0   6   61117     933                                                      119467  -21.69   -0.53  1.0000
  -2   0   7   33534     546                                                       39175   -2.92    2.90  1.0000
  -2   0  -8    7636     661                                                       29069  -19.46    1.73  1.0000
  -2   0   8    8222     520                                                       29568  -19.02   -1.70  1.0000
  -2   0  -9  175880    1461                                                      145634   -3.22    8.31  1.0000
  -2   0 -10    2959     274                                                        3460  -16.23    1.43  1.0000
  -2   0 -11   97294    1208                                                       75458   -2.73    8.82  1.0000
  -2   0 -12   15568     870                                                       34375  -13.34    0.76  1.0000
  -2   0 -13   37566    1094                                                       50024   -1.90    6.94  1.0000
  -2   0 -14    4587     230                                                         714  -10.50    0.42  1.0000
  -2   0 -15   25413    1012                                                       31693   -1.01    4.04  1.0000
  -2   0 -16    9276     792                                                       16986   -7.62    0.61  1.0000
  -2   0 -17    1786     324                                                        1428   -0.39    1.16  1.0000
  -2   0 -18   93693    1773                                                       80200   -4.98    0.92  1.0000
  -2   0 -19   53364    1460                                                       50926   -0.24   -1.15  1.0000
  -2   0 -20    9182     751                                                       11868   -2.86    0.78  1.0000
  -2   0 -21   44206    1439                                                       49598   -0.59   -2.68  1.0000
  -2   0 -22   11375     781                                                       12484   -1.12    0.04  1.0000
  -2   0 -23     352     348                                                         518   -1.15   -3.42  1.0000
   2   0 -24   18636     708                                                       18486   -0.33   -0.84  1.0000
  -2   0 -24   16660     989                                                       17520    0.51   -0.98  1.0000
   2   0 -25    2248     272                                                        1250    0.56    2.62  1.0000
  -2   0 -25    2361     436                                                        1338   -1.45   -3.63  1.0000
  -2   0 -26   16946     926                                                       14363    2.07   -1.76  1.0000
   2   0 -26   15270     652                                                       14252    0.81   -0.83  1.0000
  -2   0 -27    6416     813                                                        9520   -1.22   -3.64  1.0000
   2   0 -27    6703     543                                                        8857    0.62    2.94  1.0000
   2   0 -28    1705     292                                                        1043    2.06   -0.77  1.0000
  -2   0 -28    2739     491                                                        1637    3.19   -2.00  1.0000
  -2   0 -29    4782     557                                                        2785   -0.66   -3.63  1.0000
   2   0 -29    4089     354                                                        2532    0.44    3.29  1.0000
   2   0 -30    8052     589                                                       10772    3.01   -0.73  1.0000
  -2   0 -30    7497     886                                                       10810    3.56   -1.76  1.0000
  -2   0 -31    3482     710                                                        5563   -0.21   -3.43  1.0000
   2   0 -31    2925     457                                                        4770    0.24    3.35  1.0000
   2   0 -32     472     291                                                         154    3.43   -0.67  1.0000
  -2   0 -32     995     422                                                         460    3.28   -1.34  1.0000
   2   0 -33     994     360                                                        1984    0.14    2.92  1.0000
   2   0 -34    7061     596                                                        9993    3.44   -0.66  1.0000
   2   0 -35    5077     443                                                        3845    0.07    2.12  1.0000
   2   0 -36     228     339                                                        -169    3.23   -0.78  1.0000
   2   0 -37    1226     366                                                        1517   -0.08    1.25  1.0000
   2   0 -38    2740     373                                                        1503    2.86   -1.01  1.0000
   2   0 -39     647     338                                                         565   -0.27    0.50  1.0000
   2   0 -40     446     353                                                        1057    2.34   -1.21  1.0000
   2   0 -41    1931     357                                                        1998   -0.36   -0.11  1.0000
   2   0 -42     705     287                                                         299    1.79   -1.17  1.0000
   2   0 -43    5165     415                                                        4801   -0.31   -0.52  1.0000
   2   0 -44    1208     303                                                        1715    1.37   -0.88  1.0000
   2   0 -45    1169     266                                                        1382   -0.21   -0.62  1.0000
   2   0 -46      28     193                                                          -3    1.05   -0.51  1.0000
   2   0 -47     772     186                                                         660   -0.12   -0.45  1.0000
   2   1 -45      16     224                                                        -274    0.79   -0.36  1.0000
   2   1 -44    1319     273                                                        1201   -0.01   -0.55  1.0000
   2   1 -43    1687     330                                                        2141    1.00   -0.56  1.0000
   2   1 -42     387     287                                                         400    0.29   -0.29  1.0000
   2   1 -41     365     295                                                         193    1.01   -0.78  1.0000
   2   1 -40     379     327                                                         322    0.73    0.24  1.0000
   2   1 -39    2330     404                                                        1878    0.78   -1.09  1.0000
   2   1 -38    4547     508                                                        5004    1.12    0.97  1.0000
   2   1 -37    1269     383                                                        1224    0.48   -1.49  1.0000
   2   1 -36    6264     507                                                        4879    1.20    1.66  1.0000
   2   1 -35    1033     351                                                         577    0.24   -1.84  1.0000
   2   1 -34    2532     463                                                        3668    0.87    2.13  1.0000
   2   1 -33    4272     503                                                        5181    0.03   -1.97  1.0000
   2   1 -32     912     351                                                        1117    0.42    2.53  1.0000
   2   1 -31   10241     672                                                       12105   -0.25   -1.96  1.0000
   2   1 -30     135     305                                                         661    0.18    3.16  1.0000
   2   1 -29     133     331                                                         151   -0.60   -1.96  1.0000
   2   1 -28    5277     572                                                        8330    0.24    4.10  1.0000
  -2  -1 -28    5511     781                                                        8538    1.02    3.89  1.0000
  -2  -1 -27    1320     420                                                         956   -0.83    1.24  1.0000
   2   1 -27    1065     274                                                         523   -0.89   -2.00  1.0000
  -2  -1 -26   10885     687                                                        6601    1.29    4.94  1.0000
   2   1 -26    9754     483                                                        5696    0.40    5.14  1.0000
  -2  -1 -25   10434     762                                                        9233    0.04    1.77  1.0000
   2   1 -25    8773     581                                                        8952   -1.03   -1.86  1.0000
  -2  -1 -24   14048     904                                                       15192    1.33    5.93  1.0000
   2   1 -24   15303     722                                                       15556    0.45    6.16  1.0000
  -2  -1 -23   15524     879                                                       14397    1.23    1.80  1.0000
  -2  -1 -22    1214     539                                                        4049    1.27    6.83  1.0000
  -2  -1 -21    7884     698                                                        9972    2.47    1.17  1.0000
  -2  -1 -20    5254     564                                                        6230    1.33    7.78  1.0000
  -2  -1 -19    7923     526                                                        5364    3.48    0.19  1.0000
  -2  -1 -18   10937     757                                                       14192    1.56    8.73  1.0000
  -2  -1 -17   19831     792                                                       16505    4.05   -0.83  1.0000
  -2  -1 -16    3128     339                                                        2267    1.93    9.32  1.0000
  -2  -1 -15   11533     736                                                       16410    4.10   -2.00  1.0000
  -2  -1 -14   19473     715                                                       16556    2.33    9.20  1.0000
  -2  -1 -13    5920     496                                                        7281    3.50   -3.68  1.0000
  -2  -1 -12    2968     475                                                        7305    2.55    8.32  1.0000
  -2  -1 -11    2714     212                                                        1043    2.09   -5.90  1.0000
  -2   1  11    3708     204                                                        1357   -0.50    6.80  1.0000
  -2  -1 -10    3074     305                                                        3207    2.04    6.90  1.0000
  -2   1  10    1773     246                                                        3192   -1.27   -7.41  1.0000
  -2  -1  -9   42886    1106                                                       59158   -0.15   -8.09  1.0000
  -2   1   9   41218     910                                                       57253    1.35    8.80  1.0000
  -2  -1  -8   47597    1000                                                       58290    0.09    5.24  1.0000
  -2   1   8   46399     878                                                       56197    0.60   -5.17  1.0000
  -2   1   7    6179     424                                                       12323    3.02   10.08  1.0000
  -2  -1  -7    4852     430                                                       12636   -2.69   -9.48  1.0000
  -2  -1  -6   92844     969                                                       79471   -3.55    3.56  1.0000
  -2   1   6   91955    1052                                                       79820    4.00   -2.95  1.0000
  -2  -1  -5   98273    1078                                                      120344   -4.33   -9.73  1.0000
  -2   1   5  100338    1285                                                      121535    3.82   10.29  1.0000
  -2   1   4   15339     357                                                        8891    8.57   -1.44  1.0000
  -2  -1  -4    9723     275                                                        9515   -8.15    2.06  1.0000
  -2   1   3   34980     556                                                       22444    3.43    9.48  1.0000
  -2   1   2   27193     732                                                       37906   12.84   -0.87  1.0000
  -2   1   1    1696     217                                                        2528    1.76    8.00  1.0000
  -2   1   0  169741    1973                                                      229420   14.80   -0.78  1.0000
  -2   1  -1    3320     187                                                        1216   -1.05    6.42  1.0000
  -2  -1   1    4558     119                                                        1329    1.74   -8.16  1.0000
  -2  -1   2   21959     363                                                       25610  -12.77   -1.02  1.0000
  -2   1  -2   19950     727                                                       27582   13.30   -0.43  1.0000
  -2   1  -3   23785     586                                                       15999   -4.22    5.46  1.0000
  -2   1  -4   16392     488                                                       10165    9.03    0.68  1.0000
  -2   1  -5  105614    1672                                                      127869   -6.24    5.53  1.0000
  -2   1 -10    9189     512                                                       12643   -1.36    6.71  1.0000
  -2   1 -11    1370     195                                                         640    1.28    6.79  1.0000
  -2   1 -12    7689     583                                                       15847   -1.49    8.40  1.0000
  -2   1 -13    1530     338                                                        3693    4.06    5.56  1.0000
  -2   1 -14   12109     519                                                        9133   -0.97    9.51  1.0000
  -2   1 -15   21341     912                                                       28369    4.63    3.68  1.0000
  -2   1 -16    4079     403                                                        3717   -0.38    9.88  1.0000
  -2   1 -17   37066    1028                                                       31032    3.55    1.57  1.0000
  -2   1 -18    4610     554                                                        6164    0.04    9.41  1.0000
  -2   1 -19    7864     575                                                        6304    2.18   -0.44  1.0000
  -2   1 -20    7533     835                                                       13580    0.18    8.13  1.0000
  -2   1 -21   10238     812                                                       12068    1.43   -1.96  1.0000
  -2   1 -22    1975     542                                                        3826    0.00    6.31  1.0000
  -2   1 -23   15835     887                                                       13614    1.37   -2.60  1.0000
  -2   1 -24   11473     828                                                       11449   -0.39    4.44  1.0000
   2  -1 -24   13510     555                                                       13130    0.02    5.63  1.0000
  -2   1 -25   12728     876                                                       13031    1.52   -2.36  1.0000
   2  -1 -25   15688     579                                                       14169   -0.66    2.82  1.0000
  -2   1 -26    5487     569                                                        3677   -0.69    3.06  1.0000
   2  -1 -26    7503     365                                                        4426   -0.03    4.45  1.0000
   2  -1 -27     611     228                                                         369   -0.31    2.10  1.0000
  -2   1 -27     422     391                                                         190    1.47   -1.77  1.0000
  -2   1 -28    5849     757                                                        7353   -0.64    2.45  1.0000
   2  -1 -28    5136     468                                                        7477    0.36    3.38  1.0000
   2  -1 -29     335     233                                                         168    0.19    1.16  1.0000
  -2   1 -29     119     397                                                         174    1.06   -1.56  1.0000
   2  -1 -30     312     257                                                         166    0.80    2.45  1.0000
  -2   1 -30     118     393                                                           4   -0.31    2.50  1.0000
  -2   1 -31    3959     713                                                        5169    0.41   -1.99  1.0000
   2  -1 -31    4548     430                                                        4900    0.73    0.71  1.0000
  -2   1 -32    1084     487                                                        1347   -0.02    2.68  1.0000
   2  -1 -32    1194     302                                                        1049    0.88    1.72  1.0000
   2  -1 -33    5758     504                                                        6823    1.23    0.91  1.0000
   2  -1 -34    1803     378                                                        2299    0.51    1.27  1.0000
   2  -1 -35     811     307                                                         377    1.59    1.48  1.0000
   2  -1 -36    7044     506                                                        6252   -0.10    1.09  1.0000
   2  -1 -37     261     311                                                         336    1.76    2.11  1.0000
   2  -1 -38    4325     453                                                        4635   -0.73    1.02  1.0000
   2  -1 -39     198     342                                                        -111    1.72    2.57  1.0000
   2  -1 -40    1121     335                                                         964   -1.26    0.88  1.0000
   2  -1 -41     307     312                                                         625    1.55    2.66  1.0000
   2  -1 -42     371     285                                                         416   -1.58    0.59  1.0000
   2  -1 -43    1587     345                                                        2526    1.29    2.29  1.0000
   2  -1 -44    2493     333                                                        2945   -1.53    0.23  1.0000
   2   1  44    3537     317                                                        3240    0.04    0.95  1.0000
   2   1  45     214     181                                                         200   -0.78   -0.92  1.0000
   2  -1 -45     263     220                                                         308    0.96    1.58  1.0000
   2  -1 -46     463     211                                                         651   -1.09   -0.08  1.0000
   2  -1 -47     900     193                                                         867    0.64    0.89  1.0000
   2   2 -42    3193     381                                                        3347    0.55   -0.62  1.0000
   2   2 -41     685     299                                                         567   -0.17    0.50  1.0000
   2   2 -40    1240     358                                                        1426    0.64   -0.86  1.0000
   2   2 -39     394     347                                                         461   -0.23    1.02  1.0000
   2   2 -38    1490     393                                                        1138    0.64   -0.97  1.0000
   2   2 -37    6611     612                                                        7655   -0.06    1.38  1.0000
   2   2 -36    1092     422                                                        1394    0.44   -0.85  1.0000
  -2  -2 -35    1374     268                                                        1991   -1.82   -0.09  1.0000
   2   2 -35    1685     457                                                        2047    0.61    1.35  1.0000
  -2  -2 -34    2447     284                                                        2500    0.18   -0.11  1.0000
   2   2 -34    2443     472                                                        2334   -0.01   -0.62  1.0000
  -2  -2 -33    1701     226                                                        1017   -2.77   -0.08  1.0000
   2   2 -33    1443     405                                                         845    1.70    0.99  1.0000
  -2  -2 -32    7167     424                                                        7986   -1.03   -0.10  1.0000
   2   2 -32    8089     652                                                        8555   -0.49   -0.53  1.0000
   2   2 -31    7873     677                                                        9936    2.83    0.53  1.0000
  -2  -2 -31    6586     459                                                        9469   -3.59   -0.15  1.0000
   2   2 -30    2364     474                                                        2799   -0.66   -0.69  1.0000
  -2  -2 -30    2418     284                                                        2928   -1.57   -0.20  1.0000
   2   2 -29    8104     608                                                        7301    3.75    0.20  1.0000
  -2  -2 -29    6246     381                                                        6495   -4.13   -0.34  1.0000
   2   2 -28   12227     703                                                       11274   -0.31   -0.92  1.0000
  -2  -2 -28   10756     450                                                       10151   -1.08   -0.33  1.0000
   2   2 -27    8623     594                                                        7141    4.57   -0.02  1.0000
  -2  -2 -27    8592     353                                                        6215   -4.61   -0.49  1.0000
   2   2 -26    2060     389                                                        2061    0.50   -0.93  1.0000
  -2  -2 -26    2012     228                                                        1992    0.15   -0.32  1.0000
   2   2 -25    2581     505                                                        5234    5.52   -0.18  1.0000
   2   2 -24    7336     605                                                        8491    1.45   -0.56  1.0000
   2   2 -23   11526     530                                                        6571    6.61   -0.20  1.0000
  -2  -2 -20   25038     986                                                       22216    2.21    1.11  1.0000
  -2  -2 -19   26515    1245                                                       39116   -9.12   -0.25  1.0000
  -2  -2 -18   15932     855                                                       18638    1.52    1.71  1.0000
  -2  -2 -17   48601    1145                                                       37185  -10.13   -0.25  1.0000
  -2  -2 -16   21719     873                                                       22651    0.36    1.98  1.0000
  -2  -2 -15    5640     722                                                       16139  -11.44   -0.10  1.0000
  -2  -2 -14    8608     475                                                        6901   -1.06    1.87  1.0000
  -2  -2 -13   36743    1011                                                       39864  -13.11   -0.01  1.0000
  -2   2  13   48986    1094                                                       45455  -11.76   -2.90  1.0000
  -2   2  12    8662     547                                                       11698   -4.10    0.63  1.0000
  -2  -2 -12    8098     508                                                       10532   -2.46    1.69  1.0000
  -2   2  11   17225     430                                                        7736  -13.16   -2.63  1.0000
  -2  -2 -11   17350     409                                                        7401  -14.69   -0.26  1.0000
  -2   2  10    2468     313                                                        3668   -5.37    1.27  1.0000
  -2  -2 -10    2582     278                                                        3588   -3.40    1.94  1.0000
  -2  -2  -9   40516    1017                                                       68167  -15.42   -0.76  1.0000
  -2   2   9   43578    1170                                                       70795  -13.85   -2.17  1.0000
  -2   2   8   47645     915                                                       40771   -5.46    2.56  1.0000
  -2  -2  -8   44155     707                                                       39146   -3.44    2.85  1.0000
  -2   2   7    2417     209                                                        1290  -13.25   -1.62  1.0000
  -2  -2  -7    1062     136                                                        1264  -14.69   -1.04  1.0000
  -2   2   6    2683     361                                                        5873   -4.28    3.82  1.0000
  -2   2   5   24700     693                                                       24512  -10.82   -0.76  1.0000
  -2   2   4   64619    1009                                                       53805   -2.37    4.33  1.0000
  -2   2   3   38495     880                                                       39128   -6.49    0.36  1.0000
  -2   2   2    8610     402                                                        7728   -0.52    3.56  1.0000
  -2   2   1   41267     892                                                       38601   -1.04    1.07  1.0000
  -2   2   0   17296     600                                                       16248    0.67    1.36  1.0000
  -2   2  -1   52775     981                                                       46028    4.09    0.78  1.0000
  -2   2  -2   11503     501                                                        9986    0.85   -1.78  1.0000
  -2   2  -3   52792    1109                                                       49370    7.66   -0.29  1.0000
  -2   2  -4   59228    1118                                                       50084   -0.10   -4.63  1.0000
  -2   2  -5   21860     834                                                       27757    9.39   -1.15  1.0000
  -2   2  -6    1940     385                                                        4002   -1.90   -5.80  1.0000
  -2   2  -7    8273     336                                                        2062    9.96   -1.09  1.0000
  -2   2  -8   44254    1181                                                       42365   -3.78   -4.80  1.0000
  -2   2  -9   47956    1520                                                       67665   10.20   -0.36  1.0000
  -2   2 -10    7849     622                                                        9285   -4.82   -2.57  1.0000
  -2   2 -11   13149     593                                                        7952   10.43    0.18  1.0000
  -2   2 -12    4032     451                                                        6430   -4.51   -0.80  1.0000
  -2   2 -12    3415     532                                                        5631   -4.51   -0.80  1.0000
  -2   2 -13   22213    1073                                                       26839   10.50    0.05  1.0000
  -2   2 -13   25015     920                                                       30042   10.50    0.05  1.0000
  -2   2 -14    7273     430                                                        5527   -3.10   -0.53  1.0000
  -2   2 -15   10830     838                                                       22652   10.23   -0.48  1.0000
  -2   2 -16   27087     990                                                       29439   -1.25   -1.39  1.0000
  -2   2 -17   58114    1252                                                       45223    9.67   -0.88  1.0000
  -2   2 -18   16083     860                                                       18480    0.40   -2.21  1.0000
  -2   2 -19   13572     984                                                       23192    9.00   -1.00  1.0000
  -2   2 -20   28525    1075                                                       24798    1.45   -2.08  1.0000
  -2   2 -21   15736    1043                                                       20453    8.38   -1.10  1.0000
  -2   2 -22    1999     441                                                        1661    1.69   -1.05  1.0000
  -2   2 -23    9381     597                                                        4406    7.86   -1.37  1.0000
   2  -2 -23    9272     337                                                        4603   -6.98    0.27  1.0000
  -2   2 -24   11357     914                                                       12455    1.10    0.26  1.0000
   2  -2 -24   10797     518                                                       12073    1.43    0.05  1.0000
   2  -2 -25    1617     344                                                        4199   -6.26    0.63  1.0000
  -2   2 -25    1053     631                                                        4124    7.32   -1.68  1.0000
   2  -2 -26     354     216                                                         534    0.59    0.75  1.0000
  -2   2 -26      31     406                                                          -7    0.04    1.23  1.0000
  -2   2 -27    5207     628                                                        4711    6.55   -1.73  1.0000
   2  -2 -27    8020     391                                                        5329   -5.58    0.57  1.0000
  -2   2 -28   11572     854                                                        9860   -0.88    1.64  1.0000
   2  -2 -28   11312     524                                                       10373   -0.53    0.88  1.0000
  -2   2 -29    5745     647                                                        4201    5.32   -1.48  1.0000
  -2   2 -29    6201     796                                                        4613    5.32   -1.48  1.0000
   2  -2 -29    3725     382                                                        4302   -5.04    0.17  1.0000
  -2   2 -30    5644     943                                                        7030   -1.12    1.56  1.0000
  -2   2 -30    4654     731                                                        5920   -1.12    1.56  1.0000
   2  -2 -30    5054     436                                                        5953   -1.35    0.59  1.0000
  -2   2 -31    9337     991                                                       12770    3.69   -1.19  1.0000
   2  -2 -31    8484     586                                                       12304   -4.47   -0.12  1.0000
   2  -2 -32    5710     467                                                        6768   -1.56    0.15  1.0000
   2  -2 -33     569     285                                                         267   -3.58   -0.04  1.0000
   2  -2 -34    2159     370                                                        1923   -1.18   -0.23  1.0000
   2  -2 -35      37     312                                                         246   -2.33    0.25  1.0000
   2  -2 -36     563     319                                                         454   -0.42   -0.46  1.0000
   2  -2 -37    5164     477                                                        5171   -0.97    0.50  1.0000
   2  -2 -38    1251     355                                                        1393    0.47   -0.54  1.0000
   2  -2 -39     245     306                                                         275    0.15    0.57  1.0000
   2  -2 -40    1080     350                                                        1476    1.16   -0.47  1.0000
   2  -2 -41    1739     330                                                        1415    0.82    0.46  1.0000
   2  -2 -42    2814     342                                                        2477    1.42   -0.24  1.0000
   2  -2 -43     688     267                                                         905    1.03    0.18  1.0000
   2  -2 -44     715     242                                                         657    1.18    0.08  1.0000
   2   2  45    1893     272                                                        2303    0.54   -0.91  1.0000
   2  -2 -45    1913     267                                                        2052    0.91   -0.20  1.0000
   2  -2 -46     397     191                                                         554    0.70    0.37  1.0000
   2   2  46     467     169                                                         545   -0.14    0.54  1.0000
   2  -2 -47     644     166                                                         543    0.67   -0.49  1.0000
   2   3 -45     584     152                                                         466    0.07   -0.67  1.0000
  -2  -3 -38    2014     256                                                        2016   -0.02    0.00  1.0000
  -2  -3 -37    1394     259                                                        2013    0.28    1.84  1.0000
   2   3 -36    2661     486                                                        2655   -0.35   -0.90  1.0000
  -2  -3 -36    3155     293                                                        2883   -0.44    0.43  1.0000
  -2  -3 -35    1081     220                                                         613    0.24    2.63  1.0000
   2   3 -35     119     447                                                         -37    0.02   -2.40  1.0000
  -2  -3 -34    3777     330                                                        3459   -0.66    0.71  1.0000
   2   3 -34    3160     514                                                        2979   -0.33   -0.96  1.0000
   2   3 -33    3050     541                                                        3573    0.13   -3.09  1.0000
  -2  -3 -33    3906     338                                                        3937    0.01    3.54  1.0000
  -2  -3 -32   13800     563                                                       14455   -0.69    0.46  1.0000
   2   3 -32   14996     887                                                       15477   -0.21   -1.13  1.0000
  -2  -3 -31    1115     235                                                         873   -0.50    4.07  1.0000
   2   3 -31     193     430                                                         355    0.50   -3.38  1.0000
  -2  -3 -30    1887     271                                                        2094   -0.55   -0.60  1.0000
   2   3 -30    1231     489                                                        1796   -0.02   -1.63  1.0000
  -2  -3 -29    1344     221                                                         812   -1.19    3.82  1.0000
   2   3 -29     499     436                                                          64    1.05   -3.01  1.0000
  -2  -3 -28     724     207                                                         417   -0.16   -2.26  1.0000
   2   3 -28     465     411                                                         257    0.32   -2.40  1.0000
  -2  -3 -27    1647     268                                                        2432   -1.85    2.79  1.0000
   2   3 -27    1527     479                                                        2512    1.63   -1.99  1.0000
   2   3 -26   11257     733                                                        9677    0.83   -3.17  1.0000
  -2  -3 -26   10030     432                                                        8682    0.49   -3.85  1.0000
   2   3 -25    4577     505                                                        3427    2.10   -0.53  1.0000
  -2  -3 -25    5111     298                                                        3601   -2.30    1.28  1.0000
  -2  -3 -24    3230     312                                                        4367    1.15   -4.71  1.0000
   2   3 -24    3281     542                                                        4379    1.36   -3.69  1.0000
   2   3 -23    3158     513                                                        4192    2.40    1.08  1.0000
   2   3 -22    2187     330                                                         782    1.52   -3.91  1.0000
   2   3 -21   14730     714                                                       11494    2.51    2.50  1.0000
  -2   3  14    8149     624                                                        9779    2.15    0.95  1.0000
  -2   3  13   11915     743                                                       16784    3.77    2.43  1.0000
  -2   3  12   11114     604                                                       11965    1.90   -0.75  1.0000
  -2   3  11   13548     653                                                       14340    4.50    3.45  1.0000
  -2   3  10    1204     230                                                         661    1.20   -1.71  1.0000
  -2   3   9   14946     614                                                       13917    4.73    5.82  1.0000
  -2   3   8   49641    1097                                                       46492    0.80   -1.93  1.0000
  -2   3   7   16172     671                                                       16860    4.30    9.38  1.0000
  -2   3   6   54421    1212                                                       57584    0.78   -1.62  1.0000
  -2   3   5   35838     659                                                       16214    3.20   13.26  1.0000
  -2   3   4   49134    1116                                                       50276    0.77   -0.75  1.0000
  -2   3   3   49101    1460                                                       86236    1.60   16.35  1.0000
  -2   3   2   70093    1297                                                       67944    0.64    0.68  1.0000
  -2   3   1   23812     806                                                       24102   -0.15   17.87  1.0000
  -2   3   0    2629     345                                                        3390    0.69    2.19  1.0000
  -2   3  -1   22739     690                                                       16352   -1.74   17.60  1.0000
  -2   3  -2   66627    1373                                                       68288    1.03    2.97  1.0000
  -2   3  -3   60891    1682                                                      100185   -3.03   15.77  1.0000
  -2   3  -4   62742    1362                                                       64312    1.29    2.59  1.0000
  -2   3  -5   39701     809                                                       19746   -4.03   12.84  1.0000
  -2   3  -6   63832    1513                                                       67820    1.11    1.53  1.0000
  -2   3  -7   10856     729                                                       13045   -4.70    9.39  1.0000
  -2   3  -8   70986    1558                                                       68787    0.70    0.64  1.0000
  -2   3  -9   16532     866                                                       18598   -4.76    6.16  1.0000
  -2   3 -10     701     294                                                         582    0.65    0.34  1.0000
  -2   3 -11   15092     762                                                       12435   -3.98    3.82  1.0000
  -2   3 -12   14312     858                                                       14651    1.10    0.25  1.0000
  -2   3 -13   24116     964                                                       29112   -2.52    2.62  1.0000
  -2   3 -13   23337    1182                                                       28255   -2.52    2.62  1.0000
  -2   3 -14   20807     862                                                       22059    1.44   -0.25  1.0000
  -2   3 -14   20539    1080                                                       21782    1.44   -0.25  1.0000
  -2   3 -15   10600     594                                                        9333   -1.03    2.25  1.0000
  -2   3 -15   11397     832                                                       10085   -1.03    2.25  1.0000
  -2   3 -16   20624     890                                                       21383    0.97   -1.38  1.0000
  -2   3 -16   19990    1152                                                       20736    0.97   -1.38  1.0000
  -2   3 -17    7792     656                                                        9514   -0.28    2.12  1.0000
  -2   3 -17    6067     787                                                        7595   -0.28    2.12  1.0000
  -2   3 -18   16212    1135                                                       17050   -0.25   -2.79  1.0000
  -2   3 -18   18438     911                                                       19342   -0.25   -2.79  1.0000
  -2   3 -19   19055     964                                                       20484   -0.57    1.78  1.0000
  -2   3 -19   16389    1191                                                       17713   -0.57    1.78  1.0000
  -2   3 -20    5585     898                                                        7986   -1.43   -3.89  1.0000
  -2   3 -20    6991     728                                                        9669   -1.43   -3.89  1.0000
  -2   3 -21   11157     778                                                       10148   -1.53    1.11  1.0000
   2  -3 -21   12163     451                                                        9757    1.34   -2.26  1.0000
  -2   3 -21    9724     948                                                        8781   -1.53    1.11  1.0000
   2  -3 -22    2430     213                                                         883   -2.04   -3.89  1.0000
  -2   3 -22    2489     408                                                         887   -1.81   -4.24  1.0000
  -2   3 -22    2179     481                                                         704   -1.81   -4.24  1.0000
  -2   3 -23    4963     884                                                        6442   -2.43    0.21  1.0000
  -2   3 -23    5577     754                                                        7141   -2.43    0.21  1.0000
   2  -3 -23    6169     425                                                        7515    1.67   -1.46  1.0000
   2  -3 -24    3549     352                                                        4512   -1.39   -3.05  1.0000
  -2   3 -24    3043     757                                                        3965   -1.37   -3.75  1.0000
  -2   3 -24    3494     646                                                        4498   -1.37   -3.75  1.0000
   2  -3 -25    4328     331                                                        3358    2.00   -0.33  1.0000
  -2   3 -25    4238     573                                                        2738   -2.76   -0.78  1.0000
  -2   3 -25    5095     741                                                        3435   -2.76   -0.78  1.0000
  -2   3 -26   12226     927                                                       10830   -0.67   -2.69  1.0000
   2  -3 -26   11768     528                                                       10594   -0.59   -2.14  1.0000
  -2   3 -26   12247    1132                                                       10850   -0.67   -2.69  1.0000
  -2   3 -27    3227     624                                                        3720   -2.42   -1.72  1.0000
  -2   3 -27    3330     782                                                        3834   -2.42   -1.72  1.0000
   2  -3 -27    2769     354                                                        3629    1.98    0.92  1.0000
  -2   3 -28    1351     439                                                         945   -0.14   -1.56  1.0000
  -2   3 -28    2161     636                                                        1642   -0.14   -1.56  1.0000
   2  -3 -28    1919     288                                                        1540   -0.15   -1.19  1.0000
  -2   3 -29    2535     681                                                        1971   -1.66   -2.46  1.0000
  -2   3 -29    2318     518                                                        1773   -1.66   -2.46  1.0000
   2  -3 -29    2826     326                                                        1847    1.56    2.09  1.0000
  -2   3 -30    3393     626                                                        3740    0.15   -0.82  1.0000
   2  -3 -30    4072     421                                                        4228   -0.01   -0.30  1.0000
   2  -3 -31    1707     317                                                        1262    0.94    3.02  1.0000
   2  -3 -32   10779     587                                                       10798    0.06    0.27  1.0000
   2  -3 -33    3069     399                                                        3346    0.40    3.57  1.0000
   2  -3 -34    3465     421                                                        3418    0.12    0.38  1.0000
   2  -3 -35     393     295                                                         141    0.08    3.66  1.0000
   2  -3 -36    1959     380                                                        1918    0.07    0.15  1.0000
   2  -3 -37    1658     420                                                        3093   -0.03    3.28  1.0000
   2  -3 -38    3907     422                                                        3810   -0.10   -0.14  1.0000
   2  -3 -39    1300     311                                                         598    0.01    2.55  1.0000
   2  -3 -40     621     291                                                         647   -0.30   -0.28  1.0000
   2  -3 -41      66     274                                                          -8    0.16    1.77  1.0000
   2  -3 -42     153     246                                                         147   -0.45   -0.23  1.0000
   2  -3 -43    1727     297                                                        2229    0.38    1.19  1.0000
   2   3  44     328     228                                                         314    0.70    0.69  1.0000
   2  -3 -44     336     198                                                         253   -0.55   -0.05  1.0000
   2  -3 -45     608     186                                                         475    0.51    0.87  1.0000
   2   3  45     680     200                                                         511    0.18   -0.80  1.0000
   2  -3 -46     158     146                                                         218   -0.54    0.13  1.0000
   2   4 -42    1121     194                                                        1288   -0.38   -0.37  1.0000
   2   4 -41    2254     261                                                        2465    0.50    0.20  1.0000
  -2  -4 -39     429     182                                                         553    0.54    0.37  1.0000
  -2  -4 -38    2275     247                                                        2075   -0.42   -0.34  1.0000
  -2  -4 -37     175     186                                                         213    1.03    1.06  1.0000
  -2  -4 -36    3405     315                                                        3627   -0.34   -0.33  1.0000
  -2  -4 -35    2021     282                                                        2099    1.51    1.81  1.0000
  -2  -4 -34    2991     310                                                        2816   -0.15   -0.33  1.0000
  -2  -4 -33    1309     266                                                        1428    1.68    2.45  1.0000
  -2  -4 -32     437     229                                                         480   -0.10   -0.26  1.0000
  -2  -4 -31     277     236                                                         648    1.27    2.84  1.0000
  -2  -4 -30   10450     517                                                       10699   -0.34   -0.20  1.0000
  -2  -4 -29    4636     395                                                        5125    0.27    2.79  1.0000
  -2  -4 -28    5104     381                                                        4767   -0.75   -0.26  1.0000
  -2  -4 -27    1076     211                                                         523   -0.95    2.28  1.0000
  -2  -4 -26    1047     235                                                        1107   -1.04   -0.39  1.0000
  -2   4  14    4451     601                                                        7392    6.36   -0.38  1.0000
  -2   4  13   16192     803                                                       15744    2.41    1.24  1.0000
  -2   4  12   87611    1620                                                       80059    6.65   -0.44  1.0000
  -2   4  11   26199    1014                                                       29565    2.23    0.26  1.0000
  -2   4  10   70087    1534                                                       73762    6.02    0.12  1.0000
  -2   4   9    2534     337                                                        1862    1.56   -0.89  1.0000
  -2   4   8     968     369                                                        2850    4.83    1.10  1.0000
  -2   4   7   34750    1073                                                       36373    1.03   -1.85  1.0000
  -2   4   6   10439     664                                                       12408    3.51    1.83  1.0000
  -2   4   5   46808    1262                                                       49830    0.84   -2.78  1.0000
  -2   4   4   41561    1154                                                       42354    2.39    1.76  1.0000
  -2   4   3   58473    1340                                                       56427    0.61   -3.91  1.0000
  -2   4   2  135525    2049                                                      136790    1.78    0.84  1.0000
  -2   4   1   52790    1252                                                       48614    0.01   -5.01  1.0000
  -2   4   0   10244     574                                                        8688    1.80   -0.55  1.0000
  -2   4  -1   48405    1284                                                       48286   -0.73   -5.59  1.0000
  -2   4  -2  133313    2157                                                      137528    2.40   -1.89  1.0000
  -2   4  -3   62841    1430                                                       58265   -1.08   -5.33  1.0000
  -2   4  -4   28390    1032                                                       29097    3.40   -2.73  1.0000
  -2   4  -5   43639    1339                                                       47728   -0.93   -4.34  1.0000
  -2   4  -6   14855     874                                                       18572    4.58   -2.75  1.0000
  -2   4  -7   39654    1310                                                       42149   -0.81   -2.79  1.0000
  -2   4  -8     217     374                                                        1710    5.73   -1.91  1.0000
  -2   4  -9    6074     537                                                        5057   -1.23   -0.86  1.0000
  -2   4 -10   66635    1781                                                       69659    6.58   -0.56  1.0000
  -2   4 -11   29276    1282                                                       32199   -2.06    1.06  1.0000
  -2   4 -12   87884    2058                                                       79541    6.86    0.69  1.0000
  -2   4 -13   12366     905                                                       12922   -2.58    2.27  1.0000
  -2   4 -13   11514     710                                                       12042   -2.58    2.27  1.0000
  -2   4 -14    2858     694                                                        5698    6.42    1.33  1.0000
  -2   4 -14    2604     540                                                        5317    6.42    1.33  1.0000
  -2   4 -15   24327    1155                                                       20081   -2.22    2.22  1.0000
  -2   4 -15   24366     894                                                       20116   -2.22    2.22  1.0000
  -2   4 -16    4876     714                                                        6003    5.42    1.30  1.0000
  -2   4 -16    5214     573                                                        6398    5.42    1.30  1.0000
  -2   4 -17   31415    1210                                                       33068   -1.03    1.17  1.0000
   2   4  17   29328     798                                                       30368    0.68   -1.48  1.0000
  -2   4 -17   28067    1441                                                       29629   -1.03    1.17  1.0000
  -2   4 -18    3455     579                                                        5221    4.11    0.90  1.0000
  -2   4 -18    2644     680                                                        4188    4.11    0.90  1.0000
   2   4  18    4018     365                                                        4722    1.80   -0.24  1.0000
  -2   4 -19    3323     655                                                        3487    0.40    0.12  1.0000
  -2   4 -19    3892     557                                                        4069    0.40    0.12  1.0000
   2  -4 -19    3039     283                                                        3116   -0.51    0.04  1.0000
  -2   4 -20    8463     770                                                        9664    2.65    0.54  1.0000
   2  -4 -20    7175     421                                                        7760    1.14    0.42  1.0000
  -2   4 -20    7251     908                                                        8358    2.65    0.54  1.0000
  -2   4 -21    1829     619                                                        2413    1.45   -0.01  1.0000
  -2   4 -21    2944     560                                                        3674    1.45   -0.01  1.0000
   2  -4 -21    2115     291                                                        2570   -1.22    0.23  1.0000
  -2   4 -22    9512     794                                                        8847    1.10    0.40  1.0000
  -2   4 -22    7471     862                                                        6881    1.10    0.40  1.0000
   2  -4 -22    9455     468                                                        8903   -0.44    0.88  1.0000
  -2   4 -23    1806     579                                                        1557    1.84    0.82  1.0000
  -2   4 -23    2417     531                                                        2140    1.84    0.82  1.0000
   2  -4 -23    2841     301                                                        2182   -1.55   -0.38  1.0000
   2  -4 -24     195     229                                                         439   -1.44    1.05  1.0000
  -2   4 -24      34     446                                                          68   -0.43    0.44  1.0000
  -2   4 -24      20     457                                                          47   -0.43    0.44  1.0000
  -2   4 -25   12282    1044                                                       13530    1.64    1.91  1.0000
  -2   4 -25   10215    1111                                                       11347    1.64    1.91  1.0000
   2  -4 -25   12261     617                                                       14062   -1.59   -1.23  1.0000
  -2   4 -26    1759     670                                                        2147   -1.61    0.54  1.0000
  -2   4 -26    2003     587                                                        2418   -1.61    0.54  1.0000
   2  -4 -26    2122     330                                                        2605   -1.92    0.92  1.0000
  -2   4 -27    2703     613                                                        1592    1.14    2.53  1.0000
   2  -4 -27    2584     334                                                        2000   -1.33   -1.77  1.0000
  -2   4 -27    2458     515                                                        1405    1.14    2.53  1.0000
   2  -4 -28    5995     430                                                        5156   -1.96    0.69  1.0000
   2  -4 -29    5308     458                                                        5198   -0.82   -1.85  1.0000
   2  -4 -30   11851     625                                                       12703   -1.60    0.51  1.0000
   2  -4 -31     555     302                                                         251   -0.35   -1.67  1.0000
   2  -4 -32     188     315                                                         211   -1.00    0.34  1.0000
   2  -4 -33    1551     358                                                        1633   -0.18   -1.33  1.0000
   2  -4 -34    1755     354                                                        1663   -0.42    0.18  1.0000
   2  -4 -35    2509     404                                                        2818   -0.32   -0.87  1.0000
   2  -4 -36    4306     447                                                        4392   -0.14    0.11  1.0000
   2  -4 -37     392     318                                                         508   -0.54   -0.33  1.0000
   2  -4 -38    2368     365                                                        2263   -0.20    0.18  1.0000
   2  -4 -39     254     280                                                         214   -0.60    0.08  1.0000
   2  -4 -40       5     251                                                          -6   -0.42    0.27  1.0000
   2  -4 -41    2451     316                                                        2652   -0.46    0.24  1.0000
   2  -4 -42    2239     292                                                        2461   -0.58    0.21  1.0000
   2   4  43    1586     268                                                        1619   -0.04    0.30  1.0000
   2  -4 -43    1229     226                                                        1174   -0.20    0.23  1.0000
   2  -4 -44    1423     208                                                        1504   -0.54    0.02  1.0000
   2   4  44    1609     236                                                        1510   -0.44    0.51  1.0000
  -2  -5 -39     370     171                                                         559    0.22   -0.97  1.0000
  -2  -5 -38    2446     245                                                        2709   -0.53   -0.49  1.0000
  -2  -5 -37    2669     246                                                        2174    0.64   -0.96  1.0000
  -2  -5 -36     397     211                                                         531   -0.22   -0.70  1.0000
  -2  -5 -35     529     230                                                         684    1.07   -0.93  1.0000
  -2  -5 -34    2818     316                                                        3091    0.23   -0.84  1.0000
  -2  -5 -33     393     242                                                         740    1.39   -0.84  1.0000
  -2  -5 -32    6228     396                                                        5556    0.64   -0.85  1.0000
  -2  -5 -31     909     276                                                        1034    1.45   -0.65  1.0000
  -2  -5 -30    6500     453                                                        7034    0.84   -0.75  1.0000
  -2  -5 -29    6307     456                                                        7015    1.11   -0.41  1.0000
  -2  -5 -28      23     246                                                         -43    0.77   -0.71  1.0000
  -2  -5 -27    4835     380                                                        4584    0.43   -0.24  1.0000
  -2   5  21   17808     593                                                       17262   -0.16    0.51  1.0000
  -2   5  20     514     235                                                        1169    0.42    2.52  1.0000
  -2   5  19   13653     521                                                       14335   -0.62    0.57  1.0000
  -2   5  18    2474     276                                                        2545    0.82    2.84  1.0000
  -2   5  17     510     196                                                         363   -0.70    0.35  1.0000
  -2   5  16   10752     474                                                       12060    0.81    2.98  1.0000
  -2   5  15   11865     470                                                       12110   -0.07   -0.39  1.0000
  -2   5  14    1618     201                                                         771    0.46    2.78  1.0000
  -2   5  14    1844     379                                                         930    0.46    2.78  1.0000
  -2   5  13   27814    1091                                                       24931    0.90   -1.75  1.0000
  -2   5  13   27739     650                                                       24860    0.90   -1.75  1.0000
  -2   5  12     753     362                                                        1146   -0.10    2.17  1.0000
  -2   5  11   27373    1111                                                       29945    1.50   -3.48  1.0000
  -2   5  10    4867     481                                                        3936   -0.78    1.41  1.0000
  -2   5   9     217     354                                                        1336    1.39   -5.18  1.0000
  -2   5   8   40056    1265                                                       41794   -1.43    0.90  1.0000
  -2   5   7   17601     755                                                       13514    0.91   -6.59  1.0000
  -2   5   6   38761    1184                                                       36288   -1.79    0.84  1.0000
  -2   5   5   40545    1454                                                       54881    0.61   -7.74  1.0000
  -2   5   4   10875     703                                                       11186   -1.63    0.93  1.0000
  -2   5   3   31784     907                                                       19579    0.71   -8.62  1.0000
  -2   5   2   37647    1264                                                       39966   -1.07    0.73  1.0000
  -2   5   1    8976     801                                                       14565    1.02   -9.07  1.0000
  -2   5   0   21417     943                                                       20789   -0.52    0.17  1.0000
  -2   5  -1    9279     815                                                       14799    1.20   -8.93  1.0000
  -2   5  -2   49034    1445                                                       50000   -0.31   -0.38  1.0000
  -2   5  -3   28951     891                                                       17609    1.07   -8.22  1.0000
  -2   5  -4    9445     708                                                        9765   -0.47   -0.57  1.0000
  -2   5  -5   41037    1579                                                       54633    0.57   -7.14  1.0000
  -2   5  -6   41165    1381                                                       40051   -0.82   -0.50  1.0000
  -2   5  -7   25135    1002                                                       19983   -0.17   -5.80  1.0000
  -2   5  -8   37530    1407                                                       38952   -1.15   -0.61  1.0000
  -2   5  -9    1929     529                                                        3503   -0.80   -4.27  1.0000
  -2   5 -10   11093     801                                                        9819   -1.35   -1.13  1.0000
  -2   5 -11   42281    1584                                                       44239   -0.94   -2.67  1.0000
   2   5  12     389     265                                                        1074    0.63    2.87  1.0000
  -2   5 -12     788     382                                                        1417   -1.31   -1.83  1.0000
  -2   5 -12     556     440                                                        1096   -1.31   -1.83  1.0000
  -2   5 -13   28087    1077                                                       26150   -0.48   -1.26  1.0000
   2   5  13   26597     790                                                       25258   -2.14   -0.77  1.0000
  -2   5 -13   27199    1303                                                       25293   -0.48   -1.26  1.0000
   2   5  14     861     226                                                         438    0.11    2.75  1.0000
  -2   5 -14     853     424                                                         453   -0.93   -2.31  1.0000
  -2   5 -14    1399     362                                                         890   -0.93   -2.31  1.0000
   2   5  15   10641     562                                                       11566   -1.07   -0.42  1.0000
  -2   5 -15   12733     778                                                       12828    0.17   -0.20  1.0000
  -2   5 -15   11440     954                                                       11530    0.17   -0.20  1.0000
  -2   5 -16   11067     776                                                       11138   -0.37   -2.41  1.0000
   2   5  16   10016     546                                                       10522   -0.20    2.37  1.0000
  -2   5 -16    9820     903                                                        9880   -0.37   -2.41  1.0000
   2   5  17      99     240                                                         122   -0.17   -0.41  1.0000
  -2   5 -17      85     411                                                          88    0.42    0.54  1.0000
  -2   5 -17     626     379                                                         651    0.42    0.54  1.0000
  -2   5 -18    5711     655                                                        6261   -0.02   -2.32  1.0000
   2   5  18    5633     432                                                        5863   -0.26    1.97  1.0000
  -2   5 -18    4135     716                                                        4590   -0.02   -2.32  1.0000
  -2   5 -19   15477    1000                                                       16692    0.05    1.09  1.0000
   2   5  19   15576     641                                                       15185    0.07   -0.34  1.0000
  -2   5 -20     243     482                                                         644   -0.18   -2.26  1.0000
   2   5  20     606     305                                                        1010   -0.14    1.65  1.0000
   2  -5 -20     174     226                                                         610    0.42   -2.52  1.0000
  -2   5 -20     416     432                                                         913   -0.18   -2.26  1.0000
   2  -5 -21   21822     721                                                       21218   -0.16   -0.51  1.0000
  -2   5 -21   24524    1201                                                       22427   -0.54    1.41  1.0000
  -2   5 -22     421     518                                                         796   -0.75   -2.22  1.0000
  -2   5 -22     803     493                                                        1317   -0.75   -2.22  1.0000
   2  -5 -22     599     261                                                        1072   -0.19   -2.09  1.0000
  -2   5 -23    1835     621                                                        1974   -0.77    1.39  1.0000
  -2   5 -23    2366     580                                                        2530   -0.77    1.39  1.0000
   2  -5 -23    2857     355                                                        2966    0.08   -0.29  1.0000
  -2   5 -24    2358     689                                                        2737   -1.22   -2.03  1.0000
  -2   5 -24    3204     640                                                        3660   -1.22   -2.03  1.0000
   2  -5 -24    4044     405                                                        4234   -0.63   -1.61  1.0000
   2  -5 -25   13577     624                                                       13442   -0.11    0.07  1.0000
   2  -5 -26    4781     440                                                        4640   -0.63   -1.19  1.0000
   2  -5 -27    3209     396                                                        3186   -0.50    0.42  1.0000
   2  -5 -28     201     286                                                         172   -0.31   -0.94  1.0000
   2  -5 -29    4934     463                                                        5126   -0.79    0.50  1.0000
   2  -5 -30    7148     517                                                        7055    0.00   -0.81  1.0000
   2  -5 -31    2498     394                                                        2678   -0.96    0.17  1.0000
   2  -5 -32    7381     518                                                        7256    0.10   -0.62  1.0000
   2  -5 -33    1177     365                                                        1552   -1.10   -0.39  1.0000
   2  -5 -34    3527     414                                                        3563    0.01   -0.26  1.0000
   2  -5 -35     303     298                                                         559   -1.12   -0.81  1.0000
   2  -5 -36     387     280                                                         356   -0.10    0.19  1.0000
   2  -5 -37    1998     312                                                        1523   -0.88   -0.89  1.0000
   2  -5 -38    3335     349                                                        3221   -0.20    0.52  1.0000
   2  -5 -39     509     252                                                         681   -0.43   -0.71  1.0000
   2  -5 -40    3662     325                                                        3703   -0.27    0.58  1.0000
   2   5  40    4753     388                                                        4442   -0.63    0.26  1.0000
   2  -5 -41     302     191                                                         373   -0.07   -0.48  1.0000
   2   5  41     314     230                                                         455   -0.12    0.88  1.0000
   2  -5 -42     826     187                                                         887   -0.29    0.43  1.0000
   2   5  42     975     212                                                        1080   -0.57    0.04  1.0000
   2   5  43     237     148                                                         159   -0.24    0.65  1.0000
  -2  -6 -38     387     147                                                         476    0.28    0.39  1.0000
  -2  -6 -37     138     150                                                         152    0.37   -0.24  1.0000
  -2  -6 -36    2004     229                                                        1873    0.43    0.16  1.0000
  -2  -6 -35     957     212                                                         846    0.62   -0.34  1.0000
  -2  -6 -34    2836     284                                                        2800    0.37   -0.03  1.0000
  -2  -6 -33    1870     282                                                        2218    0.88   -0.39  1.0000
  -2  -6 -32    1522     269                                                        1570    0.12   -0.09  1.0000
  -2  -6 -31    2465     295                                                        1991    1.08   -0.30  1.0000
  -2  -6 -30     610     254                                                         659   -0.24    0.03  1.0000
  -2  -6 -29     350     242                                                         260    1.12   -0.11  1.0000
  -2  -6 -28    5950     429                                                        6015   -0.62    0.36  1.0000
  -2  -6 -27     356     254                                                         535    1.01    0.06  1.0000
  -2   6  24    5862     430                                                        6153   -1.05    0.32  1.0000
  -2   6  23    7058     465                                                        7776    0.97    0.11  1.0000
  -2   6  22   13182     577                                                       13671   -0.89    0.95  1.0000
  -2   6  21    2841     310                                                        2269    1.64    0.81  1.0000
  -2   6  20   11467     493                                                       10308   -0.57    1.09  1.0000
  -2   6  19   12235     511                                                       11592    2.29    1.80  1.0000
  -2   6  18    3843     352                                                        4310   -0.36    0.72  1.0000
  -2   6  17    8658     521                                                       12008    2.76    2.67  1.0000
  -2   6  16    2726     320                                                        2848   -0.26    0.20  1.0000
  -2   6  15    7010     405                                                        6093    3.08    3.07  1.0000
  -2   6  14   21823     660                                                       22095   -0.11   -0.19  1.0000
  -2   6  13      98     242                                                         626    3.39    2.88  1.0000
  -2   6  13     129     420                                                         737    3.39    2.88  1.0000
  -2   6  12   31597    1297                                                       30780    0.17   -0.49  1.0000
  -2   6  12   32611     790                                                       31781    0.17   -0.49  1.0000
  -2   6  11    5456     618                                                        5752    3.72    2.29  1.0000
  -2   6  11    6125     398                                                        6463    3.72    2.29  1.0000
  -2   6  10   10495     778                                                       11319    0.46   -0.81  1.0000
  -2   6  10   11898     518                                                       12775    0.46   -0.81  1.0000
  -2   6   9   33378    1164                                                       27745    3.91    1.60  1.0000
  -2   6   9   34724     746                                                       28976    3.91    1.60  1.0000
  -2   6   8    3655     508                                                        3262    0.64   -1.03  1.0000
  -2   6   8    3845     320                                                        3442    0.64   -1.03  1.0000
  -2   6   7   13713     945                                                       18098    3.75    1.09  1.0000
  -2   6   7   15352     635                                                       19975    3.75    1.09  1.0000
  -2   6   6    3011     467                                                        2704    0.75   -0.92  1.0000
  -2   6   6    2604     295                                                        2318    0.75   -0.92  1.0000
  -2   6   5   18209     976                                                       20065    3.17    0.84  1.0000
  -2   6   5   19897     656                                                       21843    3.17    0.84  1.0000
  -2   6   4   31503     795                                                       32253    0.89   -0.44  1.0000
  -2   6   4   30196    1200                                                       30930    0.89   -0.44  1.0000
  -2   6   3    2018     273                                                        1922    2.27    0.76  1.0000
  -2   6   3    1632     412                                                        1534    2.27    0.76  1.0000
  -2   6   2   11289     476                                                       10611    1.00    0.13  1.0000
  -2   6   2   11314     761                                                       10636    1.00    0.13  1.0000
  -2   6   1   20454     667                                                       21884    1.23    0.69  1.0000
  -2   6   1   20494    1066                                                       21926    1.23    0.69  1.0000
  -2   6   0   18859     650                                                       20122    0.94    0.52  1.0000
  -2   6   0   19567    1051                                                       20853    0.94    0.52  1.0000
  -2   6  -1   26218     743                                                       25827    0.09    0.56  1.0000
  -2   6  -1   26904    1173                                                       26508    0.09    0.56  1.0000
  -2   6  -2   10233     494                                                        9369    0.72    0.64  1.0000
  -2   6  -2    9956     743                                                        9104    0.72    0.64  1.0000
   2   6   3     938     272                                                        1051    2.46   -0.14  1.0000
  -2   6  -3    1257     255                                                         935   -1.18    0.42  1.0000
  -2   6  -3     877     373                                                         610   -1.18    0.42  1.0000
  -2   6  -4   32632     890                                                       33582    0.48    0.57  1.0000
  -2   6  -4   33529    1364                                                       34492    0.48    0.57  1.0000
   2   6   4   29769     916                                                       30962    1.86    0.70  1.0000
  -2   6  -5   26938     848                                                       28882   -2.50    0.42  1.0000
  -2   6  -5   26376    1239                                                       28299   -2.50    0.42  1.0000
   2   6   5   25659     863                                                       26763    2.98   -0.20  1.0000
  -2   6  -6    3743     376                                                        3580    0.30    0.40  1.0000
  -2   6  -6    3391     536                                                        3235    0.30    0.40  1.0000
   2   6   6    3426     381                                                        3469    1.08    0.35  1.0000
  -2   6  -7   14817     723                                                       18764   -3.61    0.66  1.0000
  -2   6  -7   14860    1069                                                       18813   -3.61    0.66  1.0000
   2   6   7   14985     735                                                       18606    3.23   -0.20  1.0000
  -2   6  -8    4021     414                                                        3943    0.10    0.25  1.0000
  -2   6  -8    3937     602                                                        3860    0.10    0.25  1.0000
   2   6   8    4074     400                                                        4035    0.16   -0.11  1.0000
  -2   6  -9   30913     859                                                       24899   -4.25    1.09  1.0000
  -2   6  -9   29894    1244                                                       23985   -4.25    1.09  1.0000
   2   6   9   28847     854                                                       24995    3.38   -0.44  1.0000
  -2   6 -10   11604     641                                                       11622   -0.16    0.23  1.0000
  -2   6 -10   11851     946                                                       11869   -0.16    0.23  1.0000
   2   6  10   12794     624                                                       12083   -0.57   -0.43  1.0000
  -2   6 -11    2745     442                                                        3412   -4.39    1.52  1.0000
  -2   6 -11    3091     524                                                        3823   -4.39    1.52  1.0000
  -2   6 -11    2922     638                                                        3622   -4.39    1.52  1.0000
   2   6  11    3998     408                                                        3549    3.57   -1.03  1.0000
  -2   6 -12   31628    1032                                                       31090   -0.33    0.37  1.0000
  -2   6 -12   32326    1238                                                       31782   -0.33    0.37  1.0000
  -2   6 -12   32611    1520                                                       32064   -0.33    0.37  1.0000
   2   6  12   30931     962                                                       31821   -0.83   -0.46  1.0000
   2   6  13     362     278                                                         -11    3.82   -1.70  1.0000
  -2   6 -13     862     435                                                         200   -4.25    1.73  1.0000
  -2   6 -13     434     322                                                         -31   -4.25    1.73  1.0000
  -2   6 -13    1097     350                                                         358   -4.25    1.73  1.0000
  -2   6 -14   17906     847                                                       18525   -0.19    0.49  1.0000
  -2   6 -14   17387     939                                                       17998   -0.19    0.49  1.0000
  -2   6 -14   18180    1257                                                       18804   -0.19    0.49  1.0000
   2   6  14   19659     765                                                       19355   -0.60   -0.32  1.0000
  -2   6 -15    9452     687                                                        7912   -4.05    1.57  1.0000
  -2   6 -15    9150     615                                                        7630   -4.05    1.57  1.0000
  -2   6 -15    8859     823                                                        7359   -4.05    1.57  1.0000
   2   6  15    9254     531                                                        7952    3.97   -2.04  1.0000
   2   6  16     704     320                                                         785   -0.20   -0.27  1.0000
  -2   6 -16     976     486                                                         888    0.22    0.28  1.0000
  -2   6 -16    1700     445                                                        1583    0.22    0.28  1.0000
  -2   6 -16     995     360                                                         906    0.22    0.28  1.0000
  -2   6 -17    8671     739                                                       12307   -3.83    1.07  1.0000
  -2   6 -17   10604     930                                                       14592   -3.83    1.07  1.0000
  -2   6 -17    9199    1126                                                       12934   -3.83    1.07  1.0000
   2   6  17   10241     678                                                       14212    3.73   -1.80  1.0000
  -2   6 -18    4455     514                                                        4438    0.55   -0.28  1.0000
  -2   6 -18    5644     660                                                        5626    0.55   -0.28  1.0000
  -2   6 -18    5029     794                                                        5011    0.55   -0.28  1.0000
   2   6  18    5135     471                                                        5450   -0.02   -0.50  1.0000
  -2   6 -19    6476     576                                                        6483   -3.44    0.42  1.0000
  -2   6 -19    7549     732                                                        7576   -3.44    0.42  1.0000
  -2   6 -19    5442     836                                                        5427   -3.44    0.42  1.0000
   2   6  19    7312     527                                                        7545    3.01   -1.17  1.0000
  -2   6 -20    9322     639                                                        8835    0.50   -0.79  1.0000
   2   6  20   10534     580                                                        9671   -0.24   -0.91  1.0000
  -2   6 -20    9081     783                                                        8601    0.50   -0.79  1.0000
  -2   6 -20    7753     942                                                        7309    0.50   -0.79  1.0000
   2  -6 -21    1586     275                                                        1158    1.64   -0.81  1.0000
  -2   6 -21    2377     385                                                        1605   -2.84   -0.12  1.0000
  -2   6 -22   13326     726                                                       14142    0.15   -0.78  1.0000
   2  -6 -22   13145     641                                                       13633   -0.89   -0.95  1.0000
  -2   6 -23    4514     508                                                        5904   -2.17   -0.32  1.0000
   2  -6 -23    5165     465                                                        5781    0.97   -0.11  1.0000
   2  -6 -24    3625     410                                                        3850   -1.05   -0.32  1.0000
   2  -6 -25    3655     409                                                        3406    0.49    0.11  1.0000
   2  -6 -26    8033     545                                                        8338   -0.86    0.29  1.0000
   2  -6 -27    2889     395                                                        3034    0.29   -0.03  1.0000
   2  -6 -28    8800     533                                                        8355   -0.38    0.42  1.0000
   2  -6 -29    1060     324                                                         938    0.36   -0.26  1.0000
   2  -6 -30    1178     326                                                        1188    0.08    0.12  1.0000
   2  -6 -31    2575     365                                                        2337    0.57   -0.34  1.0000
   2  -6 -32    2146     356                                                        2286    0.28   -0.22  1.0000
   2  -6 -33    2653     370                                                        3054    0.86   -0.19  1.0000
   2  -6 -34    3656     368                                                        3819    0.25   -0.33  1.0000
   2  -6 -35    1525     279                                                        1293    1.12    0.10  1.0000
   2   6  35    2352     375                                                        2180    0.62    0.34  1.0000
   2   6  36    3070     372                                                        2908    0.43   -0.16  1.0000
   2  -6 -36    2581     298                                                        2432    0.11   -0.31  1.0000
   2  -6 -37     449     224                                                         599    1.22    0.39  1.0000
   2   6  37     902     275                                                         942    0.37    0.24  1.0000
   2   6  38     741     244                                                         862    0.28   -0.39  1.0000
   2  -6 -38     450     200                                                         500   -0.04   -0.31  1.0000
   2   6  39    2433     258                                                        2518    0.15    0.17  1.0000
   2  -6 -39    1898     238                                                        2318    1.03    0.56  1.0000
   2  -6 -40     420     153                                                         427   -0.19   -0.32  1.0000
   2   6  40     383     158                                                         408    0.01   -0.58  1.0000
  -2  -7 -36    1144     161                                                        1177   -0.21    0.00  1.0000
  -2  -7 -35     335     162                                                         396   -0.11   -0.95  1.0000
  -2  -7 -34     972     186                                                         894   -0.13    0.26  1.0000
  -2  -7 -33    1089     214                                                        1236    0.14   -0.72  1.0000
  -2  -7 -32    1238     231                                                        1248   -0.02    0.39  1.0000
  -2  -7 -31    4092     322                                                        3802    0.37   -0.35  1.0000
  -2  -7 -30     940     248                                                        1009    0.08    0.45  1.0000
  -2  -7 -29    1578     276                                                        1610    0.49    0.05  1.0000
  -2  -7 -28    3039     324                                                        2735    0.14    0.61  1.0000
  -2  -7 -27     824     273                                                         960    0.56    0.37  1.0000
  -2   7  26     954     267                                                        1574   -0.11   -1.93  1.0000
  -2   7  25    1394     261                                                        1022    0.06   -1.18  1.0000
  -2   7  24     397     260                                                         715   -0.18   -1.51  1.0000
  -2   7  23    3500     374                                                        3844   -0.80   -0.82  1.0000
  -2   7  22    4810     381                                                        4197   -0.21   -1.00  1.0000
  -2   7  21    5848     419                                                        5565   -1.51   -0.26  1.0000
  -2   7  20    9506     513                                                       10062   -0.21   -0.67  1.0000
  -2   7  19    2166     332                                                        2366   -1.60    0.06  1.0000
  -2   7  18    3447     350                                                        3290   -0.13   -0.65  1.0000
  -2   7  17    2834     351                                                        3137   -1.09   -0.04  1.0000
  -2   7  16     943     287                                                         837    0.14   -0.87  1.0000
  -2   7  15   10562     526                                                       10164   -0.33   -0.46  1.0000
  -2   7  14    4592     413                                                        5014    0.64   -1.12  1.0000
  -2   7  13    7207     443                                                        6470    0.39   -0.98  1.0000
  -2   7  12    4355     385                                                        3885    1.20   -1.20  1.0000
  -2   7  11    4989     689                                                        5372    0.99   -1.48  1.0000
  -2   7  11    4503     403                                                        4864    0.99   -1.48  1.0000
  -2   7  10    8014     829                                                        9389    1.55   -1.03  1.0000
  -2   7  10    7429     495                                                        8755    1.55   -1.03  1.0000
  -2   7   9   10113     865                                                       11430    1.43   -2.00  1.0000
  -2   7   9   10415     558                                                       11752    1.43   -2.00  1.0000
  -2   7   8   10122     729                                                        8642    1.54   -0.68  1.0000
  -2   7   8   11003     514                                                        9458    1.54   -0.68  1.0000
  -2   7   7    4818     595                                                        4552    1.57   -2.54  1.0000
  -2   7   7    4652     394                                                        4387    1.57   -2.54  1.0000
  -2   7   6     139     340                                                         253    1.33   -0.28  1.0000
  -2   7   6     138     271                                                         252    1.33   -0.28  1.0000
  -2   7   5    1459     523                                                        2823    1.29   -3.06  1.0000
  -2   7   5    1835     374                                                        3338    1.29   -3.06  1.0000
  -2   7   4   17909    1005                                                       17708    1.20    0.05  1.0000
  -2   7   4   19290     691                                                       19082    1.20    0.05  1.0000
  -2   7   3    8917     664                                                        6159    0.69   -3.49  1.0000
  -2   7   3    8869     447                                                        6119    0.69   -3.49  1.0000
  -2   7   2    4220     560                                                        3832    1.31    0.31  1.0000
  -2   7   2    4205     383                                                        3817    1.31    0.31  1.0000
  -2   7   1    9561     834                                                       11381    0.02   -3.76  1.0000
  -2   7   1    9897     576                                                       11751    0.02   -3.76  1.0000
  -2   7   0   18241    1100                                                       20316    1.59    0.50  1.0000
  -2   7   0   18715     733                                                       20816    1.59    0.50  1.0000
  -2   7  -1    9414     546                                                        9574   -0.47   -3.77  1.0000
  -2   7  -1    9279     790                                                        9436   -0.47   -3.77  1.0000
   2   7   1    8273     565                                                        8449   -1.33   -3.24  1.0000
  -2   7  -2    5601     430                                                        4469    1.87    0.65  1.0000
  -2   7  -2    5622     602                                                        4488    1.87    0.65  1.0000
   2   7   2    4673     439                                                        4156   -0.87   -0.45  1.0000
  -2   7  -3    6310     427                                                        4098   -0.66   -3.37  1.0000
  -2   7  -3    5915     581                                                        3781   -0.66   -3.37  1.0000
   2   7   3    5208     416                                                        3487   -1.54   -2.87  1.0000
  -2   7  -4   18772     747                                                       19448    1.99    0.70  1.0000
  -2   7  -4   19471    1152                                                       20161    1.99    0.70  1.0000
   2   7   4   19281     815                                                       19777   -0.57   -0.62  1.0000
  -2   7  -5    3144     451                                                        4623   -0.59   -2.64  1.0000
  -2   7  -5    3396     663                                                        4928   -0.59   -2.64  1.0000
   2   7   5    3666     481                                                        5072   -1.38   -2.33  1.0000
   2   7   6    1628     362                                                        1806   -0.60   -0.82  1.0000
  -2   7  -6    1187     361                                                        1709    1.91    0.65  1.0000
  -2   7  -6    1196     498                                                        1720    1.91    0.65  1.0000
  -2   7  -7    2749     531                                                        2374   -0.34   -1.86  1.0000
   2   7   7    2914     414                                                        2746   -0.94   -1.75  1.0000
  -2   7  -7    3273     408                                                        2868   -0.34   -1.86  1.0000
  -2   7  -8   12447     633                                                       10745    1.63    0.61  1.0000
  -2   7  -8   11917     732                                                       10253    1.63    0.61  1.0000
   2   7   8   12452     657                                                       11378   -0.81   -0.96  1.0000
  -2   7  -8   12827     942                                                       11098    1.63    0.61  1.0000
  -2   7  -9   14277     738                                                       14633   -0.01   -1.37  1.0000
  -2   7  -9   13745    1057                                                       14094   -0.01   -1.37  1.0000
   2   7   9   15132     744                                                       15595   -0.44   -1.24  1.0000
  -2   7  -9   13528     857                                                       13874   -0.01   -1.37  1.0000
  -2   7 -10    5210     552                                                        6093    1.25    0.72  1.0000
  -2   7 -10    5036     752                                                        5904    1.25    0.72  1.0000
  -2   7 -10    4843     601                                                        5695    1.25    0.72  1.0000
   2   7  10    5388     525                                                        6063   -0.89   -0.97  1.0000
  -2   7 -11    4482     519                                                        5042    0.28   -1.17  1.0000
  -2   7 -11    4236     549                                                        4781    0.28   -1.17  1.0000
  -2   7 -11    4030     692                                                        4561    0.28   -1.17  1.0000
   2   7  11    4703     495                                                        5024   -0.01   -0.82  1.0000
  -2   7 -12    6266     552                                                        5771    0.89    0.99  1.0000
  -2   7 -12    5835     747                                                        5357    0.89    0.99  1.0000
  -2   7 -12    6474     583                                                        5971    0.89    0.99  1.0000
   2   7  12    6760     536                                                        6544   -0.64   -0.82  1.0000
  -2   7 -13    7285     582                                                        6815    0.52   -0.97  1.0000
  -2   7 -13    6732     613                                                        6280    0.52   -0.97  1.0000
   2   7  13    7068     548                                                        6979    0.39   -0.42  1.0000
  -2   7 -14    4254     537                                                        4745    0.64    1.28  1.0000
  -2   7 -14    4571     580                                                        5080    0.64    1.28  1.0000
   2   7  14    5144     504                                                        5321   -0.19   -0.60  1.0000
  -2   7 -15    7701     602                                                        7158    0.76   -0.50  1.0000
   2   7  15    9218     587                                                        8564    0.79    0.02  1.0000
   2   7  16     963     369                                                         851    0.21   -0.48  1.0000
  -2   7 -16     772     369                                                         692    0.50    1.42  1.0000
   2   7  17    1467     401                                                        1666    1.16    0.36  1.0000
  -2   7 -17     847     366                                                        1092    0.98    0.18  1.0000
  -2   7 -18    3138     423                                                        2568    0.40    1.41  1.0000
   2   7  18    3796     461                                                        3669    0.36   -0.63  1.0000
   2   7  19    1768     408                                                        1842    1.34    0.43  1.0000
  -2   7 -19    1081     369                                                        1238    0.99    0.75  1.0000
  -2   7 -20    9488     636                                                       10784    0.28    1.39  1.0000
   2  -7 -20   10281     560                                                       10859   -0.21    0.67  1.0000
  -2   7 -21    7820     514                                                        6945    0.59    1.00  1.0000
   2  -7 -21    7293     483                                                        6982   -1.51    0.26  1.0000
   2   7  22    4058     507                                                        3457    0.17   -1.25  1.0000
   2  -7 -22    5210     429                                                        4571   -0.21    1.00  1.0000
   2   7  23    3725     537                                                        4242    0.97   -0.21  1.0000
   2  -7 -23    4646     433                                                        5044   -0.80    0.82  1.0000
   2  -7 -24     148     278                                                         360   -0.18    1.51  1.0000
   2   7  24      31     366                                                         105    0.11   -1.22  1.0000
   2  -7 -25     367     283                                                         190    0.06    1.18  1.0000
   2   7  25     583     384                                                         445    0.70   -0.45  1.0000
   2   7  26    3576     536                                                        4100    0.13   -0.93  1.0000
   2  -7 -26    2965     413                                                        4000   -0.11    1.93  1.0000
   2  -7 -27     743     313                                                        1053    0.50    1.08  1.0000
   2   7  27    1136     407                                                        1296    0.56   -0.37  1.0000
   2   7  28    4627     506                                                        4250    0.14   -0.61  1.0000
   2  -7 -28    4638     380                                                        3512   -0.03    2.06  1.0000
   2   7  29    3229     446                                                        3277    0.49   -0.05  1.0000
   2  -7 -29    2932     341                                                        2619    0.34    0.56  1.0000
   2   7  30    2506     402                                                        2620    0.08   -0.45  1.0000
   2  -7 -30    1443     308                                                        1906   -0.02    1.81  1.0000
   2  -7 -31    5028     386                                                        4949   -0.08   -0.10  1.0000
   2   7  31    5324     447                                                        4993    0.37    0.35  1.0000
   2  -7 -32    1372     270                                                        1379   -0.08    1.25  1.0000
   2   7  32    1446     306                                                        1457   -0.02   -0.39  1.0000
   2  -7 -33    1296     253                                                        1486   -0.32   -0.63  1.0000
   2   7  33    1288     279                                                        1448    0.14    0.72  1.0000
   2  -7 -34     648     203                                                         622   -0.14    0.53  1.0000
   2   7  34     644     220                                                         581   -0.13   -0.26  1.0000
   2  -7 -35     630     188                                                         665   -0.29   -0.90  1.0000
   2   7  35     619     201                                                         707   -0.11    0.95  1.0000
   2  -7 -36     499     166                                                         460   -0.15   -0.14  1.0000
   2   7  36     323     154                                                         340   -0.21    0.00  1.0000
   2  -7 -37     108     131                                                          72   -0.19   -0.90  1.0000
  -2  -8 -32    1183     171                                                        1215    0.19    0.34  1.0000
  -2  -8 -31     197     152                                                         208    0.27    0.00  1.0000
  -2  -8 -30    1986     229                                                        1856    0.20    0.36  1.0000
  -2  -8 -29     358     196                                                         362   -0.05    0.04  1.0000
  -2  -8 -28     209     196                                                         289    0.36    0.44  1.0000
  -2  -8 -27    3823     328                                                        3759   -0.31   -0.01  1.0000
  -2  -8 -26    1515     272                                                        1690    0.58    0.47  1.0000
  -2   8  26    1618     239                                                        1871    0.36    1.09  1.0000
  -2   8  25    2243     277                                                        2640   -0.29   -0.83  1.0000
  -2   8  24    2906     296                                                        2792   -0.07    0.97  1.0000
  -2   8  23    1947     289                                                        1928   -0.88   -0.86  1.0000
  -2   8  22    2715     322                                                        2630   -0.74    0.75  1.0000
  -2   8  21    4864     389                                                        4792   -1.26   -0.59  1.0000
  -2   8  20     643     272                                                         741   -1.41    0.72  1.0000
  -2   8  19    5102     417                                                        5540   -1.30   -0.23  1.0000
  -2   8  18    1729     347                                                        2624   -1.88    1.00  1.0000
  -2   8  17    1318     312                                                        1276   -0.99    0.07  1.0000
  -2   8  16    1302     303                                                        1166   -2.05    1.38  1.0000
  -2   8  15    2521     358                                                        2617   -0.47    0.30  1.0000
  -2   8  14    6525     440                                                        5776   -1.98    1.65  1.0000
  -2   8  13   14177     613                                                       13702    0.03    0.46  1.0000
  -2   8  12    1514     342                                                        1510   -1.78    1.73  1.0000
  -2   8  11    8487     534                                                        8898    0.37    0.48  1.0000
  -2   8  10    1214     320                                                         619   -1.54    1.74  1.0000
  -2   8   9     938     332                                                         805    0.49    0.23  1.0000
  -2   8   8    3345     437                                                        4415   -1.33    1.73  1.0000
  -2   8   7    1710     371                                                        1838    0.43   -0.21  1.0000
  -2   8   6    4544     467                                                        5272   -1.14    1.60  1.0000
  -2   8   5    3568     421                                                        3208    0.29   -0.62  1.0000
  -2   8   4    2470     392                                                        2312   -0.95    1.21  1.0000
  -2   8   3     595     349                                                         776    0.10   -0.77  1.0000
  -2   8   2    3769     444                                                        3985   -0.77    0.57  1.0000
  -2   8   1    2794     417                                                        2696   -0.19   -0.61  1.0000
  -2   8   0   16664     704                                                       15850   -0.68   -0.18  1.0000
   2   8   1    5009     542                                                        5589    0.88    0.03  1.0000
  -2   8  -1    5181     500                                                        5572   -0.58   -0.30  1.0000
   2   8   2    2541     446                                                        2888   -0.62   -1.41  1.0000
  -2   8  -2    2694     425                                                        2847   -0.84   -0.84  1.0000
   2   8   3    1379     399                                                        1552    1.25    0.14  1.0000
  -2   8  -3    1687     393                                                        1469   -0.95    0.02  1.0000
   2   8   4    3776     458                                                        3271   -0.51   -1.58  1.0000
  -2   8  -4    2928     436                                                        2836   -1.25   -1.28  1.0000
   2   8   5    2763     429                                                        2514    1.31   -0.01  1.0000
  -2   8  -5    1942     419                                                        2082   -1.05    0.25  1.0000
   2   8   6    2815     463                                                        3271   -0.67   -1.37  1.0000
  -2   8  -6    2625     451                                                        3035   -1.68   -1.48  1.0000
   2   8   7    2153     419                                                        2078    0.97   -0.47  1.0000
  -2   8  -7    2051     414                                                        1908   -0.79    0.36  1.0000
   2   8   8    5770     562                                                        6799   -1.00   -1.02  1.0000
  -2   8  -8    5270     577                                                        6859   -1.82   -1.49  1.0000
   2   8   9    1534     387                                                        1437    0.36   -1.06  1.0000
  -2   8  -9    2393     438                                                        2244   -0.34    0.35  1.0000
   2   8  10    2148     389                                                        1648   -1.27   -0.73  1.0000
  -2   8 -10    3176     434                                                        2200   -1.57   -1.43  1.0000
   2   8  11    9162     633                                                       10439   -0.28   -1.42  1.0000
  -2   8 -11    9410     649                                                        9593    0.05    0.24  1.0000
   2   8  12    2274     416                                                        2069   -1.27   -0.54  1.0000
  -2   8 -12    2064     429                                                        2116   -1.17   -1.38  1.0000
   2   8  13   16637     722                                                       15024   -0.71   -1.30  1.0000
  -2   8 -13   12588     705                                                       12563    0.20    0.04  1.0000
   2   8  14    4229     468                                                        4221   -1.03   -0.35  1.0000
  -2   8 -14    3865     452                                                        3253   -0.93   -1.38  1.0000
   2   8  15    3346     455                                                        3653   -0.81   -0.69  1.0000
  -2   8 -15    2660     412                                                        2526    0.19   -0.24  1.0000
   2   8  16    1372     385                                                        1165   -0.67   -0.13  1.0000
  -2   8 -16     485     330                                                         498   -0.95   -1.37  1.0000
   2   8  17    1885     394                                                        1776   -0.64    0.13  1.0000
  -2   8 -17    1156     337                                                         999    0.14   -0.58  1.0000
  -2   8 -18    2730     412                                                        3559   -1.07   -1.32  1.0000
   2  -8 -19    7211     475                                                        7735   -1.30    0.23  1.0000
  -2   8 -19    6638     489                                                        7216    0.10   -0.85  1.0000
   2  -8 -20     830     282                                                         948   -1.41   -0.72  1.0000
   2  -8 -21    5918     431                                                        5843   -1.26    0.59  1.0000
   2  -8 -22    3091     349                                                        3002   -0.74   -0.75  1.0000
   2  -8 -23    2030     310                                                        2011   -0.88    0.86  1.0000
   2  -8 -24    3867     358                                                        3738   -0.07   -0.97  1.0000
   2  -8 -25    3074     341                                                        3536   -0.29    0.83  1.0000
   2  -8 -26    1853     291                                                        2124    0.36   -1.09  1.0000
   2  -8 -27    4392     338                                                        4143    0.27    0.52  1.0000
   2  -8 -28     738     232                                                        1021    0.50   -0.93  1.0000
   2  -8 -29     763     208                                                         701    0.64    0.17  1.0000
   2  -8 -30    1896     230                                                        1627    0.43   -0.58  1.0000
   2  -8 -31     269     166                                                         314    0.76    0.01  1.0000
   2  -8 -32    1100     173                                                        1221    0.29   -0.32  1.0000
  -2  -9 -28     782     149                                                         711    0.38    0.11  1.0000
  -2  -9 -27       9     140                                                          11   -0.11    0.18  1.0000
  -2  -9 -26     531     182                                                         572    0.19    0.17  1.0000
  -2  -9 -25     578     191                                                         606   -0.34   -0.09  1.0000
  -2   9  24     193     158                                                         220    0.25   -0.48  1.0000
  -2  -9 -24       1     201                                                        -186   -0.22    0.15  1.0000
  -2   9  23    1428     210                                                        1345    0.30   -0.03  1.0000
  -2   9  22    1453     213                                                        1260    0.16   -0.57  1.0000
  -2   9  21    1477     248                                                        1553    0.30   -0.11  1.0000
  -2   9  20    1837     272                                                        2028   -0.05   -0.60  1.0000
  -2   9  19       2     226                                                         -17    0.27   -0.16  1.0000
  -2   9  18    1928     286                                                        1778   -0.19   -0.51  1.0000
  -2   9  17    1350     281                                                        1292    0.20   -0.17  1.0000
  -2   9  16     241     263                                                         295   -0.20   -0.31  1.0000
  -2   9  15    2378     333                                                        2427    0.17   -0.16  1.0000
  -2   9  14    2115     325                                                        2124   -0.14   -0.07  1.0000
  -2   9  13    1594     320                                                        1556    0.17   -0.12  1.0000
  -2   9  12    1910     339                                                        1948   -0.05    0.08  1.0000
  -2   9  11    2372     353                                                        2313    0.13   -0.08  1.0000
  -2   9  10    2223     359                                                        2232    0.11    0.11  1.0000
  -2   9   9    4707     440                                                        4712    0.01    0.00  1.0000
  -2   9   8    1164     357                                                        1237    0.41    0.08  1.0000
  -2   9   7    1304     361                                                        1340   -0.18    0.13  1.0000
  -2   9   6    1980     389                                                        1780    0.77    0.13  1.0000
  -2   9   5    1285     366                                                        1237   -0.30    0.34  1.0000
  -2   9   4    4137     450                                                        4148    1.05    0.28  1.0000
  -2   9   3     486     358                                                         540   -0.29    0.62  1.0000
  -2   9   2     567     361                                                         609    1.17    0.40  1.0000
  -2   9   1    4776     479                                                        4750   -0.19    0.91  1.0000
  -2   9   0      14     349                                                          47    1.18    0.32  1.0000
  -2   9  -1    4026     470                                                        4092   -0.11    1.07  1.0000
   2   9   2     894     348                                                         847    0.07   -0.16  1.0000
  -2   9  -2     876     386                                                         821    1.13    0.03  1.0000
   2   9   3      34     332                                                          69    0.20    1.12  1.0000
  -2   9  -3     216     357                                                         223   -0.09    1.00  1.0000
   2   9   4    4098     478                                                        4080    0.32    0.12  1.0000
  -2   9  -4    3644     469                                                        3643    1.03   -0.29  1.0000
   2   9   5     788     361                                                         922   -0.06    1.33  1.0000
  -2   9  -5     951     391                                                         997   -0.13    0.78  1.0000
   2   9   6     963     370                                                        1115    0.56    0.28  1.0000
  -2   9  -6    1280     403                                                        1161    0.84   -0.41  1.0000
   2   9   7    2044     392                                                        1777   -0.38    1.14  1.0000
  -2   9  -7    1306     400                                                        1335   -0.19    0.61  1.0000
   2   9   8    1248     380                                                        1227    0.81    0.19  1.0000
  -2   9  -8     580     364                                                         696    0.58   -0.31  1.0000
   2   9   9    5238     501                                                        5608   -0.56    0.68  1.0000
  -2   9  -9    5140     516                                                        5114   -0.22    0.64  1.0000
  -2   9 -10     772     361                                                         811    0.33   -0.17  1.0000
   2   9  10    1481     379                                                        1370    1.02   -0.12  1.0000
  -2   9 -11    1532     382                                                        1544   -0.22    0.78  1.0000
   2   9  11    2910     403                                                        2673   -0.50    0.23  1.0000
   2   9  12    1884     368                                                        1723    1.01   -0.47  1.0000
  -2   9 -12    1132     360                                                        1124    0.20   -0.11  1.0000
  -2   9 -13    1407     348                                                        1328   -0.18    0.83  1.0000
   2   9  13    2283     383                                                        2168   -0.28    0.00  1.0000
   2   9  14    2373     389                                                        2718    0.66   -0.67  1.0000
  -2   9 -14    1911     364                                                        1902    0.24   -0.12  1.0000
  -2   9 -15    2386     351                                                        2385   -0.13    0.69  1.0000
   2  -9 -16       3     220                                                         -43   -0.20    0.31  1.0000
  -2   9 -16     356     262                                                         322    0.36   -0.05  1.0000
   2  -9 -17    1922     276                                                        1852    0.20    0.17  1.0000
  -2   9 -17    1932     304                                                        1959   -0.17    0.44  1.0000
   2  -9 -18    1754     265                                                        1611   -0.19    0.51  1.0000
   2  -9 -19       2     206                                                          -4    0.27    0.16  1.0000
   2  -9 -20    2179     283                                                        2387   -0.05    0.60  1.0000
   2  -9 -21    1841     257                                                        1926    0.30    0.11  1.0000
   2  -9 -22    1895     239                                                        1674    0.16    0.57  1.0000
   2  -9 -23    1378     218                                                        1296    0.30    0.03  1.0000
   2  -9 -24     247     172                                                         278    0.25    0.48  1.0000
   2  -9 -25    1818     207                                                        1890    0.29   -0.05  1.0000
   2  -9 -26     588     161                                                         672    0.10    0.36  1.0000
  -2 -10 -22       4     128                                                         -81    0.28    0.31  1.0000
  -2 -10 -21    1007     174                                                        1108   -0.15    0.49  1.0000
  -2  10  21    1100     151                                                        1004   -0.39   -0.18  1.0000
  -2  10  20     285     141                                                         353    0.06    0.42  1.0000
  -2 -10 -20      68     148                                                          78    0.46    0.11  1.0000
  -2  10  19     993     180                                                         981   -0.47   -0.25  1.0000
  -2  10  18     550     172                                                         466    0.14    0.41  1.0000
  -2  10  17     678     200                                                         749   -0.45   -0.31  1.0000
  -2  10  16    1187     224                                                        1271    0.28    0.36  1.0000
  -2  10  15     529     210                                                         440   -0.37   -0.44  1.0000
  -2  10  14     624     229                                                         635    0.47    0.30  1.0000
  -2  10  13    1050     252                                                        1271   -0.26   -0.72  1.0000
  -2  10  12     306     232                                                         249    0.64    0.27  1.0000
  -2  10  11     845     252                                                         610   -0.17   -1.02  1.0000
  -2  10  10     400     256                                                         535    0.72    0.27  1.0000
  -2  10   9    1050     288                                                        1400   -0.16   -1.16  1.0000
  -2  10   8    1960     301                                                        1666    0.70    0.31  1.0000
  -2  10   7     310     279                                                         500   -0.34   -1.04  1.0000
  -2  10   6    1907     328                                                        2012    0.57    0.41  1.0000
  -2  10   5    2516     338                                                        2147   -0.71   -0.76  1.0000
  -2  10   4      99     282                                                         168    0.40    0.57  1.0000
  -2  10   3     652     316                                                         822   -1.14   -0.47  1.0000
  -2  10   2    1463     338                                                        1519    0.25    0.71  1.0000
  -2  10   1     562     338                                                         862   -1.35   -0.24  1.0000
  -2  10   0    2642     399                                                        2815    0.19    0.74  1.0000
  -2  10  -1     956     338                                                         799   -1.19   -0.08  1.0000
  -2  10  -2    3226     399                                                        2961    0.28    0.63  1.0000
  -2  10  -3    2172     370                                                        2004   -0.75    0.04  1.0000
  -2  10  -4     582     324                                                         659    0.49    0.45  1.0000
  -2  10  -5    2748     397                                                        2848   -0.28    0.06  1.0000
  -2  10  -6    1961     370                                                        2274    0.70    0.30  1.0000
  -2  10  -7     205     289                                                         209    0.02   -0.04  1.0000
  -2  10  -8    1924     331                                                        1694    0.76    0.21  1.0000
  -2  10  -9    1980     330                                                        2057    0.17   -0.20  1.0000
  -2  10 -10     329     260                                                         388    0.61    0.13  1.0000
  -2  10 -11    1012     269                                                         911    0.26   -0.29  1.0000
  -2  10 -12     331     227                                                         275    0.38    0.05  1.0000
  -2  10 -13     822     234                                                         918    0.33   -0.21  1.0000
  -2  10 -14     884     215                                                         864    0.23   -0.04  1.0000
  -2  11  11     454     149                                                         465    0.34    0.41  1.0000
  -2  11  10     585     163                                                         524    0.51   -0.09  1.0000
  -2  11   9     430     175                                                         490    0.22    0.30  1.0000
  -2  11   8     526     195                                                         638    0.56   -0.12  1.0000
  -2  11   7     153     175                                                         146   -0.07    0.12  1.0000
  -2  11   6     794     203                                                         712    0.39   -0.23  1.0000
  -2  11   5     613     205                                                         670   -0.41   -0.02  1.0000
  -2  11   4       4     186                                                         -18    0.12   -0.40  1.0000
  -2  11   3     723     219                                                         639   -0.67   -0.03  1.0000
  -2  11   2     425     204                                                         339   -0.11   -0.54  1.0000
  -2  11   1     343     221                                                         475   -0.72    0.06  1.0000
  -2  11   0     283     211                                                         362   -0.28   -0.51  1.0000
  -2  11  -1     541     214                                                         497   -0.61    0.20  1.0000
  -2  11  -2     543     218                                                         545   -0.37   -0.28  1.0000
  -2  11  -3     736     211                                                         681   -0.48    0.32  1.0000
  -2  11  -4     107     191                                                          87   -0.34    0.02  1.0000
  -2  11  -5     145     188                                                         203   -0.46    0.40  1.0000
  -2  11  -6     224     174                                                         248   -0.13    0.22  1.0000
  -3   0  -1    6815     397                                                        6681   -0.40   -0.57  1.0000
  -3   0   1    7277     373                                                        6733   -0.99    1.93  1.0000
  -3   0  -2   60616    1181                                                       58362    1.16    1.64  1.0000
  -3   0   2   56162     955                                                       54748   -0.59    1.17  1.0000
  -3   0   3   28022     583                                                       22382   -1.27    3.77  1.0000
  -3   0  -3   31818     860                                                       27043    0.15   -3.13  1.0000
  -3   0  -4   11578     640                                                       13824    2.27    0.96  1.0000
  -3   0   4   10616     403                                                       12005   -1.45   -0.06  1.0000
  -3   0  -5    5900     543                                                        9853    0.15   -5.00  1.0000
  -3   0   5    5571     343                                                        9086   -1.34    4.83  1.0000
  -3   0   6     164     113                                                         525   -2.53   -1.00  1.0000
  -3   0   7   64469     851                                                       77774   -1.51    5.30  1.0000
  -3   0  -8     787     255                                                        2348    4.62    0.14  1.0000
  -3   0   8     657     144                                                        1775   -3.86   -1.02  1.0000
  -3   0  -9  131013    1529                                                      112687   -1.24   -5.67  1.0000
  -3   0 -10    9964     584                                                       15953    5.84   -0.04  1.0000
  -3   0 -11     201     241                                                        1326   -1.58   -5.14  1.0000
  -3   0 -12   18957     557                                                       11116    7.10   -0.40  1.0000
  -3   0 -13   30792    1046                                                       38697   -1.26   -4.57  1.0000
  -3   0 -14   26396    1103                                                       39918    8.18   -0.80  1.0000
  -3   0 -15   59547    1300                                                       51032   -0.46   -3.96  1.0000
  -3   0 -16   64351    1345                                                       45714    8.77   -0.75  1.0000
  -3   0 -17  117344    2288                                                      127218    0.41   -3.18  1.0000
  -3   0 -18    7277     873                                                       15577    8.69   -0.01  1.0000
  -3   0 -19    2316     390                                                        1683    1.04   -2.14  1.0000
  -3   0 -20   11215    1025                                                       20080    7.99    1.06  1.0000
  -3   0 -21   44404    1462                                                       42823    1.23   -0.96  1.0000
  -3   0 -22    5628     435                                                        2286    6.83    1.65  1.0000
   3   0 -22    7028     375                                                        2604   -7.45    0.18  1.0000
  -3   0 -23   20116    1023                                                       19653    0.92    0.17  1.0000
   3   0 -23   23191     905                                                       22257   -0.77    0.89  1.0000
  -3   0 -24     483     461                                                        2185    5.42    1.24  1.0000
   3   0 -24     475     382                                                        2318   -5.79   -0.21  1.0000
   3   0 -25    3501     447                                                        4108   -0.60    1.50  1.0000
  -3   0 -25    3375     569                                                        3971    0.34    1.05  1.0000
   3   0 -26      98     309                                                         736   -4.00   -0.36  1.0000
  -3   0 -26     110     408                                                         793    4.01    0.03  1.0000
   3   0 -27     472     289                                                         263   -0.33    1.63  1.0000
  -3   0 -27    1241     404                                                         903   -0.15    1.46  1.0000
  -3   0 -28      43     370                                                         186    2.88   -1.28  1.0000
   3   0 -28     113     331                                                           2   -2.53   -0.48  1.0000
  -3   0 -29     250     410                                                         399   -0.24    1.36  1.0000
   3   0 -29      41     375                                                        -421   -0.08    1.40  1.0000
  -3   0 -30    1012     499                                                        2042    2.20   -2.03  1.0000
   3   0 -30     673     348                                                        1163   -1.65   -0.72  1.0000
   3   0 -31   24376     961                                                       25752    0.09    0.96  1.0000
   3   0 -32     599     330                                                         428   -1.28   -0.92  1.0000
   3   0 -33   15310     756                                                       14755    0.15    0.48  1.0000
   3   0 -34    1434     364                                                        1110   -1.16   -0.91  1.0000
   3   0 -35     685     352                                                         646    0.09    0.21  1.0000
   3   0  36    1192     403                                                        1792    1.36    1.25  1.0000
   3   0 -36     729     358                                                        1063   -1.07   -0.74  1.0000
   3   0  37     525     321                                                         585    0.30   -0.16  1.0000
   3   0 -37     376     324                                                         423   -0.02    0.29  1.0000
   3   0  38    1331     319                                                         992    1.01    0.83  1.0000
   3   0 -38     991     335                                                         716   -0.97   -0.62  1.0000
   3   0 -39    4951     455                                                        4587   -0.05    0.62  1.0000
   3   0 -40    2164     371                                                        2526   -0.84   -0.60  1.0000
   3   0 -41    9734     560                                                       10592    0.04    0.95  1.0000
   3   0 -42      15     255                                                         -27   -0.63   -0.57  1.0000
   3   0 -43      92     227                                                          26    0.14    1.10  1.0000
   3   0 -44     198     203                                                         177   -0.31   -0.41  1.0000
   3   0 -45      25     186                                                        -160    0.15    1.09  1.0000
   3   1 -46     256     146                                                         279    0.11    0.34  1.0000
   3   1 -42     381     253                                                         390    0.03    0.04  1.0000
   3   1 -41      16     294                                                        -312   -0.68   -0.53  1.0000
   3   1 -40       1     311                                                        -191    0.23   -0.02  1.0000
   3   1 -39    2219     401                                                        2469   -0.80   -0.36  1.0000
   3   1 -38     335     343                                                         380    0.55    0.16  1.0000
   3   1 -37    5707     534                                                        5340   -0.59   -0.05  1.0000
   3   1 -36    3726     472                                                        3516    0.86    0.52  1.0000
   3   1 -35    5155     541                                                        5203   -0.09    0.39  1.0000
   3   1 -34     605     371                                                         362    1.03    0.90  1.0000
   3   1 -33    2895     483                                                        3033    0.40    1.02  1.0000
   3   1 -32     286     393                                                         583    1.00    1.26  1.0000
   3   1 -31    2739     466                                                        2613    0.56    1.86  1.0000
   3   1 -30    2086     409                                                        1514    0.75    1.60  1.0000
   3   1 -29   17290     907                                                       18255    0.34    2.83  1.0000
   3   1 -28   10777     732                                                       11287    0.24    1.88  1.0000
   3   1 -27   14937     754                                                       12850   -0.20    3.76  1.0000
  -3  -1 -26    5471     685                                                        7060    2.38   -1.88  1.0000
   3   1 -26    7277     605                                                        7371   -0.50    1.90  1.0000
  -3  -1 -25    3634     617                                                        5487   -1.09    4.81  1.0000
   3   1 -25    4345     561                                                        6221   -1.01    4.51  1.0000
  -3  -1 -24       0     340                                                         220    2.46   -1.98  1.0000
   3   1 -24     205     275                                                         219   -1.35    1.52  1.0000
  -3  -1 -23    3798     665                                                        7150   -1.35    5.17  1.0000
   3   1 -23    3398     568                                                        6767   -1.99    5.04  1.0000
  -3  -1 -22    4285     473                                                        3166    2.40   -1.80  1.0000
   3   1 -22    3806     401                                                        2929   -2.17    0.73  1.0000
   3   1 -21   36812    1089                                                       33121   -2.68    5.37  1.0000
  -3  -1 -21   42017    1343                                                       39950   -1.66    5.46  1.0000
  -3  -1 -20   11970     824                                                       14739    2.42   -1.13  1.0000
  -3  -1 -19   63453    1696                                                       70011   -1.73    5.69  1.0000
  -3  -1 -18   19467     849                                                       17917    2.64    0.07  1.0000
  -3  -1 -17   37397    1083                                                       31825   -1.13    5.76  1.0000
  -3  -1 -16    3560     404                                                        3462    2.99    1.66  1.0000
  -3  -1 -15   28125     938                                                       24280    0.18    5.61  1.0000
  -3  -1 -14   10925     680                                                       12776    3.23    3.33  1.0000
  -3  -1 -13  128365    2006                                                      128829    1.69    5.28  1.0000
  -3  -1 -12    8230     572                                                       10221    3.09    4.68  1.0000
  -3  -1 -11  102392    1733                                                      114183    2.70    4.88  1.0000
  -3   1  11   97041    1409                                                      111640    2.20    6.13  1.0000
  -3  -1 -10    5480     370                                                        5187    2.40    5.47  1.0000
  -3   1  10    4994     322                                                        5207    1.63    6.14  1.0000
  -3   1   9   25122     579                                                       18980    2.80    6.55  1.0000
  -3  -1  -9   24550     639                                                       19885    3.01    4.54  1.0000
  -3   1   8   17448     629                                                       22029    0.98    6.60  1.0000
  -3  -1  -8   17698     636                                                       21927    1.29    5.88  1.0000
  -3   1   7   42555     780                                                       32596    2.60    6.40  1.0000
  -3  -1  -7   39825     724                                                       32206    3.03    4.30  1.0000
  -3  -1  -6   19675     478                                                       15879    0.18    6.37  1.0000
  -3   1   6   22087     572                                                       16371    0.02    7.29  1.0000
  -3  -1  -5  115177    1261                                                      123242    3.37    3.99  1.0000
  -3   1   5  125752    1598                                                      132453    1.69    5.52  1.0000
  -3  -1  -4   35321     698                                                       40305   -0.45    7.31  1.0000
  -3   1   4   34620     925                                                       42073   -0.89    7.97  1.0000
  -3   1   3   51285    1083                                                       53634    0.76    3.91  1.0000
  -3  -1  -2   13119     459                                                       10223   -0.39    8.57  1.0000
  -3   1   2   12502     483                                                        9285   -1.26    8.53  1.0000
  -3  -1  -1    8767     520                                                       13387    4.54    1.73  1.0000
  -3   1   1    9289     533                                                       10795    0.57    1.76  1.0000
  -3   1   0    3475     510                                                        9817   -0.76    8.94  1.0000
  -3  -1   0    4437     453                                                       12045    0.21    9.55  1.0000
[truncated: 398,019 more chars]
